# Supplementary material for: A benzotriazole-mediated route to protected marine-derived hetero-2,5-diketopiperazines containing proline
Source: Royal Society of Chemistry journal article supplement (doi:10.1039/c5ob00023h), 2015-01-01

## **Supporting Information**

### **A Benzotriazole-Mediated Route to Protected Marine-Derived Hetero-2,5-Diketopiperazines Containing Proline**

Olivier Nsengiyumva,<sup>a</sup> Sadra Hamedzadeh,<sup>a</sup> James McDaniel,<sup>a</sup> Jocelyn Macho,<sup>a</sup> Grant Simpson,<sup>a</sup>  
Siva S. Panda,<sup>a</sup> Khanh Ha,<sup>a</sup> Iryna Lebedyeva,<sup>a</sup> Hassan M. Faidallah,<sup>b</sup> Manal Metgen Al-  
Mohammadi,<sup>b</sup> C. Dennis Hall,<sup>a,\*</sup> and Alan R. Katritzky,<sup>a,b</sup>

<sup>a</sup>*Center for Heterocyclic Compounds, Department of Chemistry, University of Florida,*

*Gainesville, FL 32611-7200, USA*

<sup>b</sup>*Chemistry Department, Faculty of Science, King Abdulaziz University, Jeddah 21589, Saudi*

*Arabia*

*E-mail: [charlesdennishall@gmail.com](mailto:charlesdennishall@gmail.com)*

## Experimental Section

Melting points were determined on a capillary point apparatus equipped with a digital thermometer.  $^1\text{H}$  NMR and  $^{13}\text{C}$  NMR spectra were recorded in  $\text{CDCl}_3$ ,  $\text{DMSO}-d_6$ ,  $\text{acetone}-d_6$ , or  $\text{CD}_3\text{OD}$  using a 300 or 500 MHz spectrometer (with TMS as an internal standard). The following abbreviations are used to describe spin multiplicity: s = singlet, d = doublet, t = triplet, q = quartet, m = multiplet, br s = broad singlet, dd = doublet of doublets, ddd = doublet of doublets of doublets, and dt = doublet of triplets. HPLC–MS analyses were performed on a reverse phase gradient using 0.2% acetic acid in  $\text{H}_2\text{O}$ /methanol as mobile phases; wavelength = 254 nm; mass spectrometry was done with electrospray ionization (ESI), matrix-assisted laser desorption/ionisation-time of flight (MALDI-TOF) or atmospheric-pressure chemical ionization (APCI). Ether refers to diethyl ether.

### General procedure for the preparation of benzotriazolides **2a-d** and **7a,b**

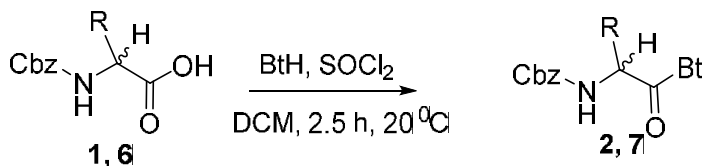

A stirred solution of 1*H*-benzotriazole (BtH) (4 equiv.) in dry tetrahydrofuran (THF) (10 mL/1 g of BtH) was treated at  $20^\circ\text{C}$  with thionyl chloride ( $\text{SOCl}_2$ ) (1.1 equiv.). After 20 minutes, a solution of Cbz-protected amino acid **1** (1 equiv.) or **6** (0.5 equiv) in dry THF (10 mL/1 g) was added slowly and the resulting solution was then stirred for 2.5 h at  $20^\circ\text{C}$ . Upon completion, the mixture was filtered, and THF was removed under reduced pressure. The residue was dissolved by dichloromethane ( $\text{CH}_2\text{Cl}_2$  50 mL/1 g of BtH) and washed successively with aq.  $\text{Na}_2\text{CO}_3$  (10%,  $3 \times 1$  mL/1 mL  $\text{CH}_2\text{Cl}_2$ ) HCl (4N,  $1 \times 1$  mL/1 mL  $\text{CH}_2\text{Cl}_2$ ), and brine (1 mL/1 mL

CH<sub>2</sub>Cl<sub>2</sub>). The organic layer was dried over magnesium sulfate (MgSO<sub>4</sub>), filtered and evaporated to give the crude product. The solid was recrystallized from CH<sub>2</sub>Cl<sub>2</sub>/hexanes to yield benzotriazolides **2** or **7**.

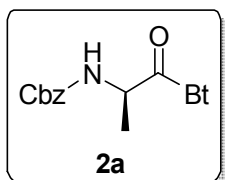

**Cbz-D-Ala-Bt (2a).** White solid, 2.64 g, 8.15 mmol, 91% yield; mp 113.0–115.0 °C (114.0–115.0). <sup>1</sup>H NMR (CDCl<sub>3</sub>, 300 MHz): δ 8.25 (d, *J* = 8.2 Hz, 1H), 8.13 (dt, *J* = 8.3, 1.0 Hz, 1H), 7.67 (td, *J* = 8.3, 1.0 Hz, 1H), 7.52 (td, *J* = 8.3, 1.1 Hz, 1H), 7.22 – 7.43 (m, 5H), 5.81 (dq, *J* = 7.3, 5.1 Hz, 1H), 5.68 (d, *J* = 4.4 Hz, 1H), 5.19 - 5.02 (m, 2H), 1.69 (d, *J* = 7.1 Hz, 3H). <sup>13</sup>C NMR (CDCl<sub>3</sub>, 75 MHz): δ 172.5, 155.8, 146.2, 131.3, 130.9, 128.7, 128.4, 128.3, 126.7, 120.5, 114.5, 67.4, 50.8, 19.3. Anal. Calcd for C<sub>17</sub>H<sub>16</sub>N<sub>4</sub>O<sub>3</sub>: C 62.95, H 4.97, N 17.27. Found: C 62.94, H 4.92, N 17.30. HRMS (ESI): calcd for C<sub>17</sub>H<sub>16</sub>N<sub>4</sub>O<sub>3</sub>Na [M + Na]<sup>+</sup> 347.1114, found 347.1116

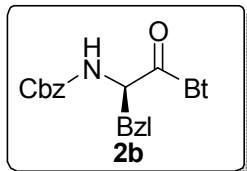

**Cbz-D-Phe-Bt (2b).** White solid, 2.60 g, 6.48 mmol, 97% yield; mp 145.0–147.0 °C (148.0–150.0). <sup>1</sup>H NMR (CDCl<sub>3</sub>, 300 MHz): δ 8.31 (d, *J* = 8.2 Hz, 1H), 8.23 (d, *J* = 8.2 Hz, 1H), 7.75 (td, *J* = 7.1, 1.1 Hz, 1H), 7.61 (td, *J* = 7.1, 1.1 Hz, 1H), 7.48 – 7.19 (m, 10H), 6.27-6.13 (m, 1H), 5.81 (m, *J* = 5.7 Hz, 1H), 5.18 (s, 2H), 3.57 (dd, *J* = 13.9, 5.1 Hz, 1H), 3.31 (dd, *J* = 14.0, 7.9 Hz, 1H). <sup>13</sup>C NMR (CDCl<sub>3</sub>, 75 MHz): δ 171.0, 155.9, 146.1, 136.2, 135.2, 131.1, 130.9, 129.4, 128.8, 128.6, 128.3, 128.2, 127.5, 126.7, 120.5, 114.4, 67.3, 55.8, 38.9. Anal. Calcd for C<sub>23</sub>H<sub>20</sub>N<sub>4</sub>O<sub>3</sub>: C 68.99, H 5.03, N 13.99. Found: C 68.96, H 4.90, N 13.99.

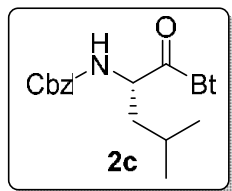

**Cbz-L-Leu-Bt (2c).** Sticky oil, 2.65 g, 7.24 mmol, 96% yield. <sup>1</sup>H NMR (CDCl<sub>3</sub>, 300 MHz): δ 8.24 (d, *J* = 8.2 Hz, 1H), 8.12 (d, *J* = 8.1 Hz, 1H), 7.65 (t, *J* = 6.7 Hz, 1H), 7.51 (t, *J* = 6.7 Hz, 1H), 7.40 – 7.27 (m, 5H), 5.84

(dd,  $J = 10.1, 3.1$  Hz, 1H), 5.61 (d,  $J = 8.0$  Hz, 1H), 5.17 – 5.03 (m, 2H), 1.96 – 1.81 (m, 2H), 1.79 – 1.70 (m, 1H), 1.10 (d,  $J = 5.4$  Hz, 3H), 0.96 (d,  $J = 5.8$  Hz, 3H).  $^{13}\text{C}$  NMR ( $\text{CDCl}_3$ , 75 MHz):  $\delta$  172.6, 156.3, 146.1, 136.2, 131.3, 130.8, 128.7, 128.3, 126.6, 120.4, 114.5, 67.4, 53.6, 42.0, 25.3, 23.4, 21.4. HRMS (ESI): calcd for  $\text{C}_{20}\text{H}_{22}\text{N}_4\text{O}_3\text{Na}$   $[\text{M} + \text{Na}]^+$  389.1584, found 389.1583

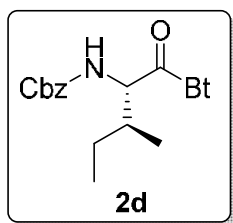

**Cbz-L-Ile-Bt (2d).** Sticky oil, 2.65 g, 7.24 mmol, 96% yield.  $^1\text{H}$  NMR ( $\text{CDCl}_3$ , 300 MHz):  $\delta$  8.26 (d,  $J = 8.2$  Hz, 1H), 8.12 (d,  $J = 8.3$  Hz, 1H), 7.65 (td,  $J = 8.2, 1.0$  Hz, 1H), 7.52 (td,  $J = 7.2, 1.1$  Hz, 1H), 7.43 – 7.25 (m, 5H), 5.85 – 5.65 (m, 2H), 5.17 – 5.08 (m, 2H), 2.29 – 2.19 (m, 1H), 1.66 –

1.46 (m, 1H), 1.30 – 1.13 (m, 1H), 1.08 (d,  $J = 6.8$  Hz, 3H), 0.88 (t,  $J = 7.4$  Hz, 3H).  $^{13}\text{C}$  NMR ( $\text{CDCl}_3$ , 75 MHz):  $\delta$  171.8, 156.4, 146.1, 136.2, 131.1, 130.8, 128.6, 128.3, 126.6, 120.5, 114.5, 67.4, 59.3, 38.3, 24.3, 16.1, 11.4. HRMS (ESI): calcd for  $\text{C}_{20}\text{H}_{22}\text{N}_4\text{O}_3\text{Na}$   $[\text{M} + \text{Na}]^+$  389.1584, found 389.1587

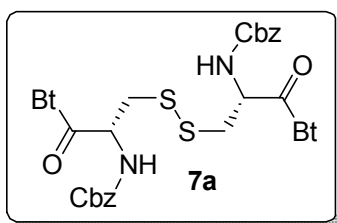

**Bis-Cbz-L-Cys-Bt (7a).** White solid, 2.54 g, 3.58 mmol, 91% yield; mp  $^{\circ}\text{C}$ .  $^1\text{H}$  NMR ( $\text{CDCl}_3$ , 300 MHz):  $\delta$  8.21 (d,  $J = 8.3$  Hz, 2H), 8.07 (d,  $J = 8.3$  Hz, 2H), 7.67 (t,  $J = 7.7$  Hz, 2H), 7.52 (t,  $J = 7.7$  Hz, 2H), 7.41 – 7.25 (m, 10H), 6.11 – 6.00 (m, 2H), 5.92 (d,  $J =$

8.6 Hz, 2H), 5.12 (br s, 4H), 3.45 (dd,  $J = 14.4, 3.0$  Hz, 2H), 3.32 (dd,  $J = 15.0, 6.7$  Hz, 2H).  $^{13}\text{C}$  NMR ( $\text{CDCl}_3$ , 75 MHz):  $\delta$  169.5, 155.9, 146.1, 136.1, 131.2, 128.7, 128.4, 126.9, 120.6, 114.5, 67.7, 54.3, 40.9. Anal. Calcd for  $\text{C}_{34}\text{H}_{30}\text{N}_8\text{O}_6\text{S}_2$ : HRMS (ESI): calcd for  $\text{C}_{34}\text{H}_{30}\text{N}_8\text{O}_6\text{S}_2\text{Na}$   $[\text{M} + \text{Na}]^+$  733.1621, found 733.1628

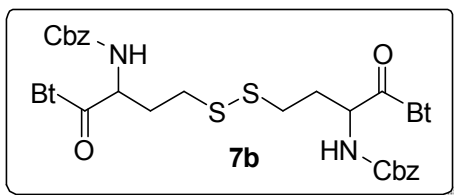

**Bis-Cbz-Homo-D,L-Cys-Bt (7b).** White solid, 2.42 g, 3.28 mmol, 88% yield.  $^1\text{H}$  NMR ( $\text{CDCl}_3$ , 300 MHz):  $\delta$  8.30 – 8.20 (m, 2H), 8.18 – 8.05 (m, 2H), 7.67 (t,  $J = 7.5$  Hz, 2H), 7.58 – 7.46 (m, 2H), 7.46 – 7.24 (m, 10H), 6.03

(d,  $J = 9.1$  Hz, 2H), 5.98 – 5.81 (m, 2H), 5.12 (s, 4H), 2.98 – 2.78 (m, 4H), 2.66 – 2.44 (m, 2H), 2.24 (dddd,  $J = 14.2, 7.0, 7.0, 7.0$  Hz, 2H).  $^{13}\text{C}$  NMR ( $\text{CDCl}_3$ , 75 MHz):  $\delta$  171.3, 171.2, 156.3, 146.2, 131.3, 131.1, 128.7, 128.4, 126.8, 120.7, 114.5, 67.70, 54.3, 35.0, 33.2. Anal. Calcd for  $\text{C}_{36}\text{H}_{34}\text{N}_8\text{O}_6\text{S}_2$ : HRMS (ESI): calcd for  $\text{C}_{36}\text{H}_{34}\text{N}_8\text{O}_6\text{S}_2\text{Na}$   $[\text{M} + \text{Na}]^+$  761.1934, found 761.1939

### General procedure for the preparation of dipeptides 3a-g, 8a,b

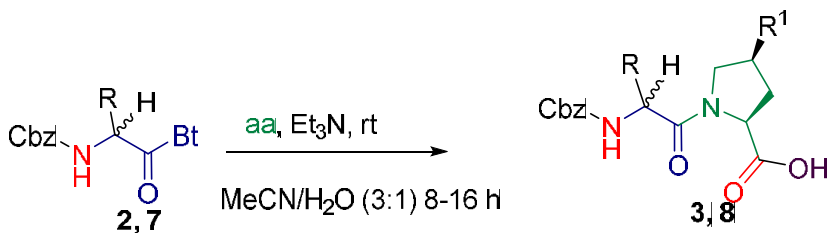

Benzotriazolides **2** or **7** (1 equiv.) were each suspended in acetonitrile/water (3:1) (25 mL/1 g) and a solution of amino acid (D- or L-Pro, or trans-4-hydroxy-L-Pro-benzyl ester), (1 equiv.) in water (5 mL/1 g of amino acid) containing triethylamine (1.0–1.1 equiv for **2** and 2.0–2.2 equiv for **7**.) was added slowly. The mixtures were stirred at 20 °C for 16-24 h until TLC revealed consumption of the starting materials. The solvent was removed under reduced pressure and the residue was dissolved in ethyl acetate. The solution was washed with 4N HCl (3 × 1.5 mL/1 mL of ethyl acetate) and brine (1 mL/1 mL of ethyl acetate). Recrystallization from ethyl acetate/hexanes yielded dipeptides **3** or **8**

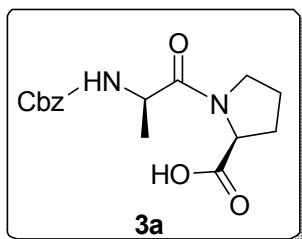

**Cbz-D-Ala-L-Pro-OH (3a).** Sticky oil, 0.96 g, 3.01 mmol, 65% yield.

$^1\text{H}$  NMR ( $\text{CDCl}_3$ , 300 MHz):  $\delta$  7.79 (s, 1H), 7.37 – 7.15 (m, 5H), 6.25 (d,  $J = 8.0$  Hz, 1H), 5.14 – 4.89 (m, 2H), 4.56 – 4.37 (m, 2H), 3.64 (dt,  $J = 9.6, 6.5$  Hz, 1H), 3.51 (dt,  $J = 10.3, 6.5$  Hz, 1H), 2.26 – 2.02 (m,

1H), 2.02 – 1.71 (m, 3H), 1.28 (d,  $J = 7.1$  Hz, 3H).  $^{13}\text{C}$  NMR ( $\text{CDCl}_3$ , 75 MHz):  $\delta$  175.8, 174.6, 173.4, 172.2, 156.3, 155.9, 136.3, 128.5, 128.4, 128.1, 128.0, 127.9, 127.8, 66.8, 59.6, 59.4, 49.5, 48.4, 47.1, 31.1, 28.9, 24.6, 22.4, 20.7, 18.1. HRMS (ESI): calcd for  $\text{C}_{16}\text{H}_{19}\text{N}_2\text{O}_5$  [ $\text{M} - \text{H}$ ] $^-$  319.1288, found 319.1293

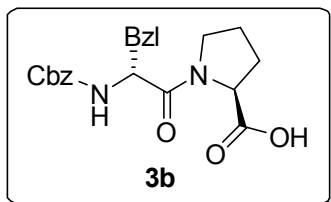

**Cbz-D-Phe-L-Pro-OH (3b).** Sticky oil, 1.40 g, 3.52 mmol, 92% yield.

$^1\text{H}$  NMR ( $\text{CDCl}_3$ , 300 MHz):  $\delta$   $^1\text{H}$  NMR (300 MHz, Chloroform-*d*)  $\delta$  11.07 (s, 1H), 7.39 – 7.01 (m, 10H), 6.18 (d,  $J = 8.5$  Hz, 1H), 5.14 – 4.83 (m, 3H), 4.72 (dd,  $J = 9.0, 6.1$  Hz, 1H),

4.35 – 4.22 (m, 1H), 3.63 – 3.46 (m, 1H), 3.25 – 2.77 (m, 2H), 2.72 – 2.55 (m, 1H), 2.05 – 1.88 (m, 1H), 1.88 – 1.66 (m, 2H).  $^{13}\text{C}$  NMR ( $\text{CDCl}_3$ , 75 MHz):  $\delta$  174.7, 174.3, 172.4, 171.4, 156.5, 155.9, 136.8, 136.3, 136.0, 129.5, 128.5, 128.4, 128.1, 128.0, 127.9, 127.6, 127.1, 127.0, 126.7, 125.9, 66.9, 66.8, 59.7, 59.3, 54.2, 53.6, 47.2, 47.1, 39.7, 37.8, 31.1, 28.6, 24.3, 22.5. HRMS (ESI): calcd for  $\text{C}_{22}\text{H}_{23}\text{N}_2\text{O}_5$  [ $\text{M} - \text{H}$ ] $^-$  395.1601, found 395.1605

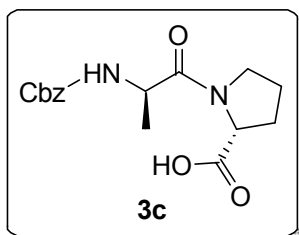

**Cbz-D-Ala-D-Pro-OH (3c).** Sticky oil, 1.11 g, 3.47 mmol, 75% yield.

$^1\text{H}$  NMR ( $\text{CDCl}_3$ , 300 MHz):  $\delta$  7.82 (br s, 1H), 7.46 – 7.22 (m, 5H), 6.28 (d,  $J = 8.0$  Hz, 1H), 5.12 – 4.96 (m, 2H), 4.58 – 4.44 (m, 2H), 3.70 – 3.62 (m, 1H), 3.61 – 3.45 (m, 1H), 2.27 – 2.05 (m, 1H),

2.06 – 1.76 (m, 3H), 1.32 (d,  $J = 7.1$  Hz, 3H).  $^{13}\text{C}$  NMR ( $\text{CDCl}_3$ , 75 MHz):  $\delta$  175.9, 174.5, 172.5, 156.1, 155.9, 136.4, 128.5, 128.1, 128.0, 127.9, 66.8, 59.0, 49.5, 48.3, 47.0, 28.7, 24.7, 18.3, 17.5. HRMS (ESI): calcd for  $\text{C}_{16}\text{H}_{19}\text{N}_2\text{O}_5$  [ $\text{M} - \text{H}$ ] $^-$  319.1288, found 319.1295

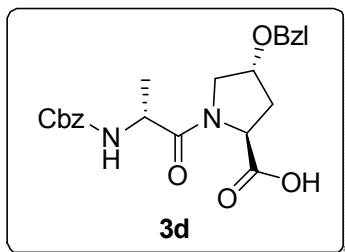

**Cbz-D-Ala-L-Hyp(OBzl)-OH (3d).** Sticky oil, 1.26 g, 2.96 mmol, 64% yield.  $^1\text{H}$  NMR ( $\text{CDCl}_3$ , 300 MHz):  $\delta$  10.81 (s, 1H), 7.47 – 7.18 (m, 10H), 6.19 (d,  $J = 8.3$  Hz, 1H), 5.23 – 4.99 (m, 3H), 4.63 – 4.46 (m, 2H), 4.41 (t,  $J = 7.4$  Hz, 1H), 4.33 – 4.22 (m,

1H), 3.83 (dd,  $J = 11.2, 4.6$  Hz, 1H), 3.68 (d,  $J = 11.4$  Hz, 1H), 2.42 (ddd,  $J = 12.6, 8.5, 3.6$  Hz, 1H), 2.18 (ddd,  $J = 13.0, 7.3, 5.0$  Hz, 1H), 1.42 (d,  $J = 7.2$  Hz, 3H).  $^{13}\text{C}$  NMR ( $\text{CDCl}_3$ , 75 MHz):  $\delta$  172.5, 171.6, 170.2, 156.0, 155.8, 146.1, 146.0, 137.5, 136.6, 131.2, 130.8, 130.7, 128.7, 128.6, 128.3, 128.2, 128.1, 127.7, 126.6, 126.5, 77.8, 71.4, 67.3, 66.9, 58.7, 52.9, 50.7, 48.5, 35.2, 18.8, 18.6. HRMS (ESI): calcd for  $\text{C}_{23}\text{H}_{25}\text{N}_2\text{O}_6$  [ $\text{M} - \text{H}$ ] $^-$  425.1707, found 425.1712

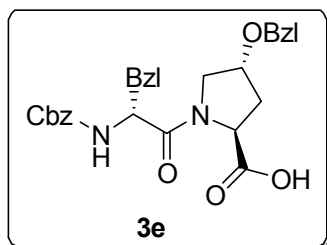

**Cbz-D-Phe-L-Hyp(OBzl)-OH (3e).** Sticky oil, 1.41 g, 2.81 mmol, 75% yield.  $^1\text{H}$  NMR ( $\text{CDCl}_3$ , 300 MHz):  $\delta$  10.72 (s, 1H), 7.45 – 7.12 (m, 15H), 6.28 (d,  $J = 8.9$  Hz, 1H), 5.21 – 4.89 (m, 4H), 4.87 – 4.77 (m, 1H), 4.77 – 4.66 (m, 1H), 4.60 – 4.42 (m, 1H), 4.29 – 4.12 (m,

1H), 3.85 (dd,  $J = 11.0, 5.1$  Hz, 1H), 3.26 (dd,  $J = 14.3, 4.8$  Hz, 1H), 3.21 (dd,  $J = 11.3, 3.6$  Hz, 1H), 3.10 (dd,  $J = 19.7, 7.0$  Hz, 1H), 3.04 – 2.79 (m, 1H).  $^{13}\text{C}$  NMR ( $\text{CDCl}_3$ , 75 MHz):  $\delta$  173.2, 172.0, 167.7, 164.6, 152.1, 137.6, 135.9, 134.9, 134.8, 130.1, 129.5, 129.1, 128.9, 128.8, 128.7, 128.6, 128.5, 128.3, 128.2, 128.1, 127.9, 127.7, 127.4, 76.2, 74.5, 71.6, 70.8, 69.5, 67.1, 62.7, 57.6, 54.2, 51.7, 39.1, 38.6, 35.5, 33.9, 29.9, 28.3. HRMS (ESI): calcd for  $\text{C}_{29}\text{H}_{29}\text{N}_2\text{O}_6$  [ $\text{M} - \text{H}$ ] $^-$  501.2020, found 501.2017

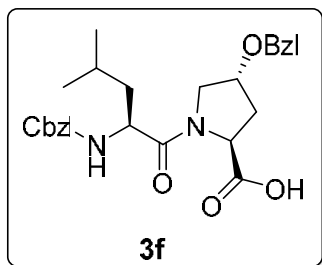

**Cbz-L-Leu-L-Hyp(OBzl)-OH (3f).** Sticky oil, 1.30 g, 2.78 mmol, 68% yield.  $^1\text{H}$  NMR ( $\text{CDCl}_3$ , 300 MHz):  $\delta$  8.62 (s, 1H), 7.37 – 7.16 (m, 10H), 6.03 (d,  $J = 9.0$  Hz, 1H), 5.14 – 5.03 (m, 3H), 4.58 – 4.44 (m, 2H), 4.38 (ddd,  $J = 13.6, 7.4, 3.1$  Hz, 1H), 4.28 – 4.10 (m, 1H), 3.85 (dd,  $J = 11.2, 4.6$  Hz, 1H), 3.63 (dd,  $J = 11.1, 1.1$  Hz, 1H), 2.35 (ddd,  $J = 12.8, 8.3, 3.9$  Hz, 1H), 2.16 (dt,  $J = 13.0, 6.2$  Hz, 1H), 1.76 – 1.57 (m, 2H), 1.57 – 1.34 (m, 1H), 0.98 – 0.71 (m, 6H).  $^{13}\text{C}$  NMR ( $\text{CDCl}_3$ , 75 MHz):  $\delta$  176.8, 174.6, 172.8, 156.6, 156.4, 137.4, 136.4, 136.3, 128.6, 128.5, 128.2, 128.1, 127.9, 127.6, 126.1, 71.4, 67.1, 58.3, 52.5, 52.4, 51.1, 41.6, 41.5, 34.4, 24.8, 24.6, 23.4, 23.0, 21.9, 21.8. HRMS (ESI): calcd for  $\text{C}_{26}\text{H}_{31}\text{N}_2\text{O}_6$  [ $\text{M} - \text{H}$ ] $^-$  467.2176, found 467.2177

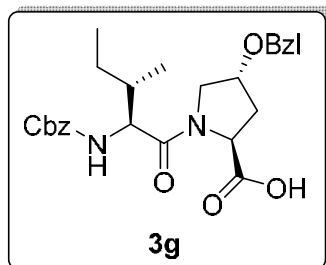

**Cbz-L-Ile-L-Hyp(OBzl)-OH (3g).** Sticky oil, 1.36 g, 2.91 mmol, 71% yield.  $^1\text{H}$  NMR (500 MHz, Methanol- $d_4$ )  $\delta$  7.39 – 7.22 (m, 10H), 5.14 – 5.02 (m, 4H), 4.68 – 4.54 (m, 1H), 4.52 – 4.45 (m, 1H), 4.34 – 4.25 (m, 1H), 4.13 (d,  $J = 5.6$  Hz, 1H), 3.73 – 3.66 (m, 1H), 1.96 – 1.77 (m, 1H), 1.68 – 1.55 (m, 1H), 1.49 (dq,  $J = 15.0, 7.5, 4.5$  Hz, 1H), 1.30 – 1.13 (m, 2H), 1.02 – 0.91 (m, 6H).  $^{13}\text{C}$  NMR ( $\text{CDCl}_3$ , 75 MHz):  $\delta$  176.5, 156.4, 139.7, 136.3, 128.7, 128.4, 128.3, 128.1, 127.9, 76.7, 71.2, 67.3, 67.1, 58.4, 58.3, 57.1, 52.5, 38.0, 37.6, 35.1, 25.0, 24.5, 15.6, 15.3, 11.8, 11.1. HRMS (ESI): calcd for  $\text{C}_{26}\text{H}_{31}\text{N}_2\text{O}_6$  [ $\text{M} - \text{H}$ ] $^-$  467.2176, found 467.2179

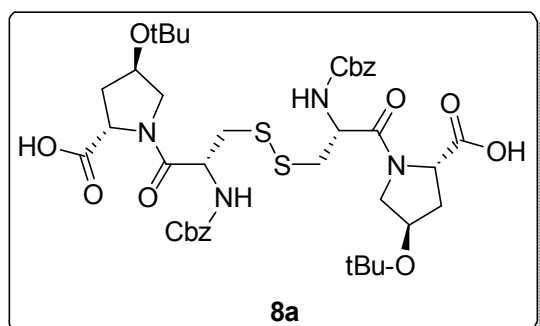

**Bis-Cbz-L-Cys-L-Hyp(O-*t*Bu)-OH (8a).** Sticky oil, 1.47 g, 1.73 mmol, 82% yield.  $^1\text{H}$  NMR ( $\text{CD}_3\text{OD}$ , 300 MHz):  $\delta$  7.42 – 7.21 (m, 10H), 5.09



(br s, 4H), 5.15 – 5.03 (m, 4H), 4.80 (dd, 2H), 4.54 – 4.32 (m, 4H), 3.92 (dd,  $J = 10.7, 5.5$  Hz, 2H), 3.66 (dd, 2H), 3.17 (dd,  $J = 14.1, 4.8$  Hz, 2H), 2.89 (dd,  $J = 14.3, 9.2$  Hz, 2H), 2.25 – 1.98 (m, 4H), 1.19 (br s, 18H).  $^{13}\text{C}$  NMR ( $\text{CD}_3\text{OD}$ , 75 MHz):  $\delta$  171.5, 158.5, 138.1, 130.0, 129.6, 129.4, 129.1, 129.0, 128.9, 75.6, 71.1, 68.4, 68.0, 59.6, 55.5, 53.5, 41.0, 38.2, 29.1, 28.7.

HRMS (ESI): calcd for  $\text{C}_{40}\text{H}_{53}\text{N}_4\text{O}_{12}\text{S}_2$  [ $\text{M} - \text{H}$ ] $^-$  845.3095, found 845.3091

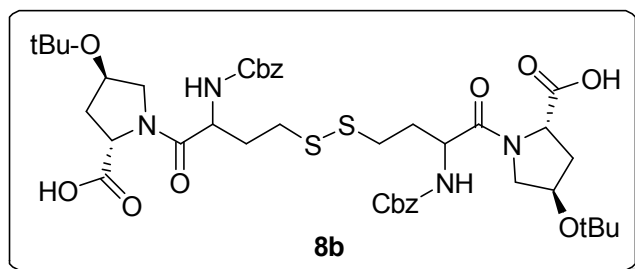

**Bis-Cbz-Homo-D,L-Cys-L-Hyp(O-*t*Bu)-**

**OH (8b).** White solid, 0.24 g, 0.65 mmol, 77% yield; mp 79.0–83.0 °C.  $^1\text{H}$  NMR ( $\text{CD}_3\text{OD}$ , 300 MHz):  $\delta$  7.38 – 7.26 (m,

10H), 5.18 – 5.04 (m, 4H), 4.66 – 4.58 (m, 2H), 4.49 (t,  $J = 6.7$  Hz, 2H), 4.46 – 4.29 (m, 2H), 3.92 – 3.82 (m, 2H), 3.74 – 3.62 (m, 2H), 2.87 – 2.63 (m, 4H), 2.23 – 2.13 (m, 4H), 2.13 – 2.05 (m, 2H), 2.05 – 1.91 (m, 2H), 1.33 – 1.11 (m, 18H).  $^{13}\text{C}$  NMR ( $\text{CD}_3\text{OD}$ , 75 MHz):  $\delta$  175.5, 172.6, 158.5, 138.3, 129.6, 129.2, 129.1, 129.0, 110.2, 75.7, 71.2, 69.3, 67.9, 67.8, 59.5, 59.3, 55.7, 54.2, 52.6, 38.4, 38.3, 35.6, 35.0, 32.5, 28.74, 28.71. HRMS (ESI): calcd for  $\text{C}_{42}\text{H}_{57}\text{N}_4\text{O}_{12}\text{S}_2$  [ $\text{M} - \text{H}$ ] $^-$  873.3408, found 873.3401

**General procedure for the preparation of dipeptidoyl bentratriazolides 4a-g, 9a,b**

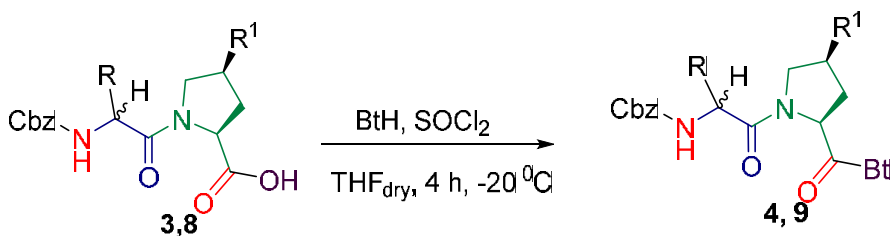

A stirred solution of BtH (4 equiv.) in dry tetrahydrofuran (THF) (15 mL/1 g) was treated at -20 °C with  $\text{SOCl}_2$  (1 equiv.). After 20 minutes, the solution of BtH and  $\text{SOCl}_2$  was cooled down

on ice and salt (NaCl) for 5mins and a solution of **3** (1 equiv.) or **8** (0.5 equiv.) in dry THF (20 mL/1 g of dipeptide) was added drop-wise and the resulting solutions were then stirred for 4 h at -20 °C. THF was removed under reduced pressure and the residue was dissolved ethyl acetate (85 mL/1 g BtH) and washed successively with Na<sub>2</sub>CO<sub>3</sub> 10 wt.-% in water (3 × 1 mL/1 mL of ethyl acetate), HCl (4N, 1 × 1 mL/1 mL of CH<sub>2</sub>Cl<sub>2</sub>), and brine (1 × 30 mL/1 mL of CH<sub>2</sub>Cl<sub>2</sub>). The organic layer was dried over magnesium sulfate, filtered and evaporated. The crude product was then recrystallized from CH<sub>2</sub>Cl<sub>2</sub>/hexanes to yield dipeptidoyl bentratriazolides **4** or **9**

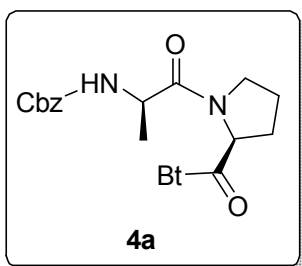

**Cbz-D-Ala-L-Pro-Bt (4a).** Sticky oil, 0.92 g, 2.19 mmol, 70% yield.

<sup>1</sup>H NMR (CDCl<sub>3</sub>, 500 MHz): δ 8.26 (d, *J* = 8.8 Hz, 1H), 8.12 (d, *J* = 8.2 Hz, 1H), 7.64 (t, *J* = 8.4 Hz, 1H), 7.51 (t, *J* = 8.0 Hz, 1H), 7.45 – 7.21 (m, 5H), 5.93 (d, *J* = 9.0 Hz, 1H), 5.75 (d, *J* = 7.9 Hz, 1H), 5.21 – 5.02 (m, 2H), 4.73 – 4.61 (m, 1H), 4.17 – 3.88 (m, 1H), 3.75 – 3.52 (m, 1H), 2.65 – 2.48 (m, 1H), 2.31 – 2.08 (m, 3H), 1.40 (d, *J* = 6.4 Hz, 3H). <sup>13</sup>C NMR (CDCl<sub>3</sub>, 75 MHz): δ 171.8, 171.4, 170.1, 167.4, 165.9, 155.6, 146.1, 136.5, 131.3, 130.8, 130.6, 130.5, 128.8, 128.5, 128.0, 126.6, 126.5, 126.2, 120.3, 114.6, 114.5, 69.3, 66.8, 60.5, 59.8, 48.6, 47.5, 45.6, 38.3, 29.7, 25.0, 23.3, 21.1, 19.0, 18.7 (Compound was partially hydrolyzed). HRMS (ESI): calcd for C<sub>22</sub>H<sub>23</sub>N<sub>5</sub>O<sub>4</sub>Na [M + Na]<sup>+</sup> 444.1642, found 444.1649

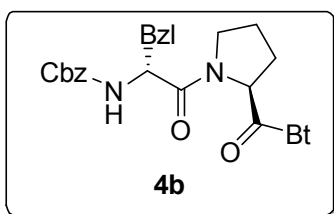

**Cbz-D-Phe-L-Pro-Bt (4b).** Sticky oil, 0.73 g, 1.46 mmol, 53%

yield. <sup>1</sup>H NMR (CDCl<sub>3</sub>, 300 MHz): δ 8.15 (ddd, *J* = 8.3, 1.1, 1.1 Hz, 1H), 8.02 (ddd, *J* = 8.3, 1.0, 1.0 Hz, 1H), 7.54 (ddd, *J* = 8.3, 7.1, 1.1 Hz, 1H), 7.41 (ddd, *J* = 8.2, 7.1, 1.1 Hz, 1H), 7.35 – 7.09 (m, 10H), 5.70 (dd, *J* = 8.9, 4.6 Hz, 1H), 5.65 (d, *J* = 8.8 Hz, 1H), 5.11 – 4.95 (m, 2H), 4.73 (ddd, *J* = 9.0, 8.9, 5.4 Hz, 1H), 3.62 (ddd, *J* = 9.5, 7.2, 5.3 Hz, 1H), 3.03 (dd, *J* = 13.0, 5.5 Hz,

1H), 2.90 (dd,  $J = 12.7, 9.4$  Hz, 1H), 2.74 (ddd,  $J = 9.9, 6.9, 6.9$  Hz, 1H), 2.30 – 2.10 (m, 1H), 2.06 – 1.69 (m, 2H), 1.66 – 1.46 (m, 1H).  $^{13}\text{C}$  NMR ( $\text{CDCl}_3$ , 75 MHz):  $\delta$  170.2, 170.0, 155.7, 146.1, 136.5, 136.2, 131.3, 130.9, 130.6, 129.6, 129.4, 128.8, 128.7, 128.6, 128.2, 128.1, 127.3, 126.5, 120.5, 120.3, 114.6, 114.4, 67.3, 67.0, 59.5, 54.2, 47.4, 40.3, 29.7, 24.8. HRMS (ESI): calcd for  $\text{C}_{28}\text{H}_{27}\text{N}_5\text{O}_4\text{Na}$   $[\text{M} + \text{Na}]^+$  520.1955, found 520.1957

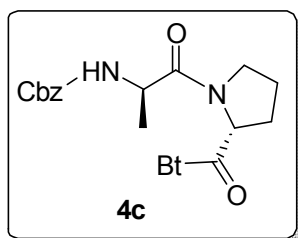

**Cbz-D-Ala-D-Pro-Bt (4c).** Sticky oil, 1.00 g, 2.37 mmol, 76% yield.

$^1\text{H}$  NMR ( $\text{CDCl}_3$ , 300 MHz):  $\delta$  8.17 (d,  $J = 8.2$  Hz, 1H), 8.04 (d,  $J = 8.3$  Hz, 1H), 7.61 – 7.49 (m, 1H), 7.48 – 7.37 (m, 1H), 7.36 – 7.16 (m, 5H), 6.01 (d,  $J = 8.1$  Hz, 1H), 5.91 (dd,  $J = 7.8, 3.9$  Hz, 1H), 5.19 – 4.93 (m, 2H), 4.62 (dq,  $J = 7.0, 6.9$  Hz, 1H), 3.95 – 3.78 (m, 1H), 3.78 – 3.63 (m, 1H), 2.64 – 2.40 (m, 1H), 2.21 – 2.01 (m, 3H), 1.41 (d,  $J = 6.8$  Hz, 3H).  $^{13}\text{C}$  NMR ( $\text{CDCl}_3$ , 75 MHz):  $\delta$  173.8, 172.2, 171.5, 170.0, 155.7, 145.8, 136.3, 131.0, 130.5, 130.4, 130.2, 128.5, 128.3, 128.0, 127.9, 127.7, 126.3, 126.2, 126.0, 120.1, 120.0, 119.9, 114.7, 114.2, 66.9, 66.6, 59.6, 50.5, 48.3, 47.2, 29.5, 25.1, 23.0, 20.5, 18.4, 18.0. HRMS (ESI): calcd for  $\text{C}_{22}\text{H}_{23}\text{N}_5\text{O}_4\text{Na}$   $[\text{M} + \text{Na}]^+$  444.1642, found 444.1645

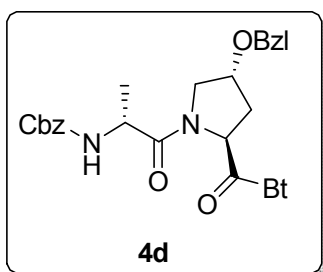

**Cbz-D-Ala-L-Hyp(OBzl)-Bt (4d).** Sticky oil, 1.14 g, 2.16 mmol,

92% yield.  $^1\text{H}$  NMR ( $\text{CDCl}_3$ , 300 MHz):  $\delta$  8.27 (d,  $J = 8.2$  Hz, 1H), 8.14 (ddd,  $J = 7.7, 2.6$  Hz, 1H), 7.66 (td,  $J = 9.5, 8.5, 5.8$  Hz, 1H), 7.59 – 7.47 (m, 1H), 7.46 – 7.26 (m, 10H), 6.36 – 6.06 (m, 1H), 5.97 (d,  $J = 8.0$  Hz, 1H), 5.92 – 5.72 (m, 1H), 5.31 – 5.04 (m, 2H), 4.79 – 4.51 (m, 2H), 4.50 – 4.38 (m, 1H), 4.28 – 4.00 (m, 1H), 3.92 (d,  $J = 10.6$  Hz, 1H), 2.92 – 2.71 (m, 1H), 2.40 – 2.24 (m, 1H), 1.69 (d,  $J = 6.3$  Hz, 2H), 1.44 (d,  $J = 6.2$  Hz, 1H).  $^{13}\text{C}$  NMR ( $\text{CDCl}_3$ , 75 MHz):  $\delta$  176.2, 174.6, 172.6, 156.3, 156.2, 138.7, 137.4, 136.2, 128.7, 128.6, 128.3,

128.1, 128.0, 127.7, 126.2, 115.0, 71.4, 67.1, 58.6, 52.6, 49.8, 48.7, 34.5, 18.5, 18.1. HRMS (ESI): calcd for  $C_{29}H_{29}N_5O_5Na$   $[M + Na]^+$  550.2060, found 550.2062

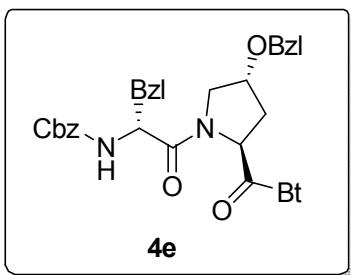

**Cbz-D-Phe-L-Hyp(OBzl)-Bt (4e).** Sticky oil, 1.08 g, 1.79 mmol,

90% yield.  $^1H$  NMR ( $CDCl_3$ , 300 MHz):  $\delta$  8.37 – 8.22 (m, 1H),

8.21 – 8.08 (m, 1H), 7.77 – 7.64 (m, 1H), 7.63 – 7.47 (m, 1H),

7.46 – 7.08 (m, 15H), 6.24 – 6.08 (m, 1H), 6.08 – 5.93 (m, 1H),

5.92 – 5.74 (m, 1H), 5.24 – 4.96 (m, 2H), 4.66 – 4.26 (m, 2H),

4.25 – 3.91 (m, 1H), 3.48 (t,  $J = 17.3$  Hz, 1H), 3.34 – 3.16 (m, 1H), 3.16 – 2.87 (m, 2H), 2.37 –

2.14 (m, 1H), 2.13 – 1.95 (m, 1H).  $^{13}C$  NMR ( $CDCl_3$ , 75 MHz):  $\delta$  171.6, 171.0, 170.7, 169.9,

156.0, 146.1, 138.9, 137.5, 136.4, 135.8, 135.2, 131.2, 131.1, 130.9, 130.7, 129.5, 129.4, 128.8,

128.7, 128.6, 128.3, 128.2, 128.1, 128.0, 127.7, 127.5, 127.3, 126.7, 126.5, 125.9, 120.5, 120.3,

115.1, 114.4, 76.3, 71.5, 67.4, 67.0, 60.6, 58.6, 58.4, 55.9, 54.1, 52.7, 39.0, 38.9, 35.1, 28.2, 14.3.

HRMS (ESI): calcd for  $C_{35}H_{33}N_5O_5Na$   $[M + Na]^+$  626.2373, found 626.2368

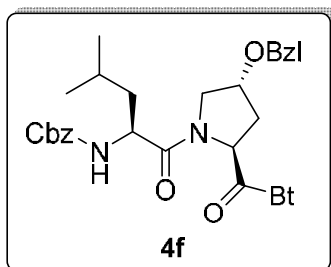

**Cbz-L-Leu-L-Hyp(OBzl)-Bt (4f).** Sticky oil, 0.91 g, 1.60 mmol,

75% yield.  $^1H$  NMR ( $CDCl_3$ , 300 MHz):  $\delta$  8.23 (dd,  $J = 7.7$ , 3.6

Hz, 1H), 8.16 – 8.02 (m, 1H), 7.62 (td,  $J = 10.6$ , 9.5, 5.3 Hz, 1H),

7.49 (t,  $J = 8.1$  Hz, 1H), 7.41 – 7.24 (m, 10H), 6.09 – 5.98 (m,

1H), 5.97 – 5.55 (m, 2H), 5.19 – 5.00 (m, 2H), 4.74 – 4.44 (m, 2H), 4.44 – 4.32 (m, 1H), 4.08

(dd,  $J = 11.1$ , 4.4 Hz, 1H), 3.88 (d,  $J = 11.3$  Hz, 1H), 2.77 (ddd,  $J = 12.5$ , 8.4, 3.3 Hz, 1H), 2.41 –

2.15 (m, 1H), 1.93 – 1.80 (m, 1H), 1.79 – 1.65 (m, 1H), 1.55 (dt,  $J = 8.8$ , 4.3 Hz, 1H), 1.05 –

0.80 (m, 6H).  $^{13}C$  NMR ( $CDCl_3$ , 75 MHz):  $\delta$  172.6, 171.7, 170.0, 156.2, 146.1, 137.4, 136.5,

131.2, 130.7, 130.5, 128.6, 128.5, 128.2, 128.1, 127.9, 127.5, 126.5, 126.4, 120.3, 120.2, 114.5, 114.4, 71.4, 67.3, 66.9, 58.6, 53.5, 52.7, 51.0, 42.2, 41.8, 35.2, 25.2, 24.6, 23.4, 23.2, 22.0, 21.3.

HRMS (ESI): calcd for  $C_{32}H_{35}N_5O_5Na$   $[M + Na]^+$  592.2530, found 592.2535

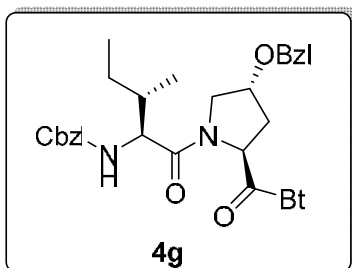

**Cbz-L-Ile-L-Hyp(OBzl)-Bt (4g).** Sticky oil, 0.97 g, 1.71 mmol, 80% yield.  $^1H$  NMR ( $CDCl_3$ , 300 MHz):  $\delta$  8.27 – 8.14 (m, 1H), 8.05 (dd,  $J = 8.3, 3.5$  Hz, 1H), 7.58 (t,  $J = 7.7$  Hz, 1H), 7.45 (t, 1H), 7.38 – 7.16 (m, 10H), 5.98 (d,  $J = 9.2$  Hz, 1H), 5.86 – 5.68 (m, 2H), 5.18 – 4.93 (m, 4H), 4.66 – 4.41 (m, 1H), 4.40 – 4.26

(m, 1H), 3.94 – 3.79 (m, 1H), 2.34 – 1.99 (m, 2H), 1.95 – 1.68 (m, 1H), 1.66 – 1.34 (m, 1H), 1.32 – 1.10 (m, 1H), 1.02 (d,  $J = 6.7$  Hz, 3H), 0.93 – 0.74 (m, 3H).  $^{13}C$  NMR ( $CDCl_3$ , 75 MHz):  $\delta$  171.7, 170.3, 156.4, 145.9, 137.5, 136.3, 130.9, 130.6, 130.4, 128.4, 128.1, 128.0, 127.8, 127.7, 126.4, 120.2, 114.3, 76.9, 70.9, 67.2, 66.8, 59.1, 58.8, 56.8, 52.6, 38.1, 37.6, 35.7, 24.3, 24.1, 15.9, 15.3, 11.2, 11.0. HRMS (ESI): calcd for  $C_{32}H_{35}N_5O_5Na$   $[M + Na]^+$  592.2530, found 592.2531

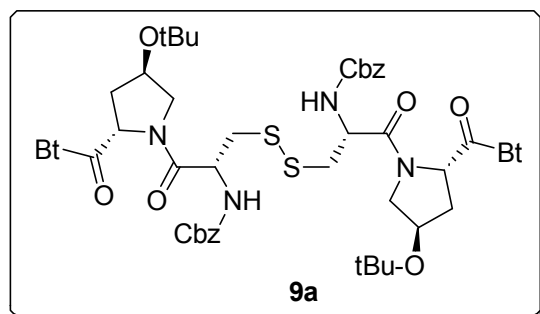

**Bis-Cbz-L-Cys-L-Hyp(O-tBu)-Bt (9a).** White solid, 0.84 g, 0.80 mmol, 68% yield; mp 74.0–80.0 °C.  $^1H$  NMR ( $CDCl_3$ , 300 MHz):  $\delta$  8.25 (d,  $J = 8.0$  Hz, 2H), 8.12 (d,  $J = 8.4$  Hz, 2H), 7.71 – 7.57 (m, 2H), 7.56 – 7.46 (m, 2H), 7.45 – 7.21 (m, 10H),

6.12 – 5.92 (m, 2H), 5.87 (d,  $J = 8.9$  Hz, 2H), 5.20 – 5.03 (m, 4H), 5.03 – 4.82 (m, 2H), 4.73 – 4.19 (m, 2H), 4.18 – 3.86 (m, 2H), 3.75 (t,  $J = 12.9$  Hz, 2H), 3.41 – 2.71 (m, 4H), 2.60 – 2.40 (m, 2H), 2.37 – 2.19 (m, 2H), 1.19 (s, 18H).  $^{13}C$  NMR ( $CDCl_3$ , 75 MHz):  $\delta$  170.4, 169.4, 166.7,

156.1, 152.5, 146.2, 136.3, 131.3, 130.7, 128.8, 128.7, 128.3, 128.2, 128.1, 127.7, 126.6, 120.4, 114.7, 74.8, 74.6, 69.9, 69.4, 67.6, 67.3, 67.1, 58.9, 58.8, 55.0, 54.0, 52.2, 42.1, 41.4, 39.3, 38.5, 37.8, 29.9, 28.4. HRMS (ESI): calcd for  $C_{52}H_{60}N_{10}O_{10}S_2Na$   $[M + Na]^+$  1071.3827, found 1071.3825

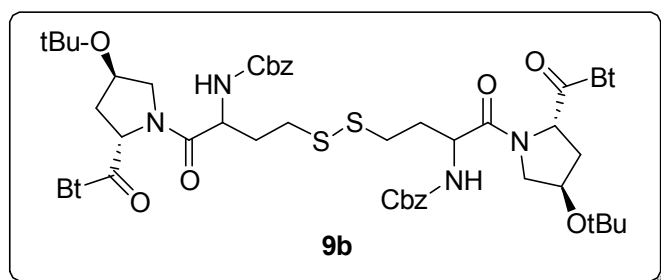

**Bis-Cbz-D,L-Homo-Cys-L-Hyp(O-tBu)-Bt (9b).** White solid, 0.94 g, 0.87 mmol, 76% yield; mp 77.0–82.0 °C.  $^1H$  NMR ( $CDCl_3$ , 300 MHz):  $\delta$  8.31 – 8.19

(m, 2H), 8.18 – 8.05 (m, 2H), 7.74 – 7.57 (m, 2H), 7.57 – 7.44 (m, 2H), 7.40 – 7.27 (m, 10H), 6.13 – 5.95 (m, 2H), 5.93 – 5.58 (m, 2H), 5.19 – 5.00 (m, 4H), 4.86 – 4.71 (m, 2H), 4.55 – 4.40 (m, 2H), 4.15 – 3.89 (m, 2H), 3.79 – 3.56 (m, 2H), 2.88 – 2.65 (m, 4H), 2.62 – 2.43 (m, 2H), 2.34 – 2.21 (m, 6H), 1.25 – 1.12 (m, 18H).  $^{13}C$  NMR ( $CDCl_3$ , 75 MHz):  $\delta$  170.5, 170.4, 156.3, 146.3, 136.4, 131.3, 130.8, 128.9, 128.7, 128.4, 128.3, 128.2, 126.6, 126.3, 120.5, 114.7, 74.9, 70.0, 69.7, 67.2, 58.6, 54.7, 51.5, 37.6, 32.5, 29.9, 28.4, 28.3. HRMS (ESI): calcd for  $C_{54}H_{64}N_{10}O_{10}S_2Na$   $[M + Na]^+$  1099.4140, found 1099.4135

### General procedure for the synthesis of DKPs 5a-g and bis-DKPs 10a,b

A solution of dipeptidoyl benzotriazolide **4** or **9** (1mmol ) and triethylamine (1.5mmol for **4** and 3 mmol for **9**) or DIPEA (1.5mmol for **4** and 3 mmol for **9**) in dry acetonitrile, using a 10mL microwave tube (80% filled) was subjected to microwave activation (100°C, 70 W) for 2-3h. The solvent was removed under reduced pressure and the residue was dissolved in ethyl acetate. The solution was washed with 4N HCl (3 × 1.5 mL/1 mL of ethyl acetate) and brine (1 mL/1 mL of ethyl acetate). Recrystallization from ethyl acetate/hexanes and direct purification

by column chromatography (hexanes/ethyl acetate gradient) gave the corresponding DKP product.

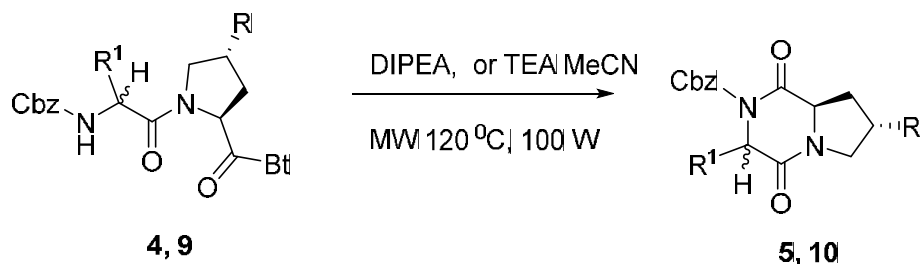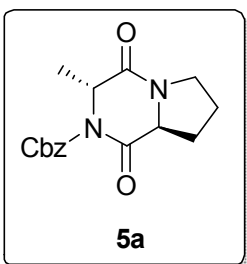

**Cyclo-[Cbz-D-Ala-L-Pro] (5a).** Sticky oil, 173 mg, 0.57 mmol, 69%

yield.  $^1\text{H}$  NMR ( $\text{CDCl}_3$ , 300 MHz):  $\delta$  7.46 – 7.32 (m, 5H), 5.31 (s, 2H), 4.87 (q,  $J = 7.2$  Hz, 1H), 4.21 (dd,  $J = 9.3, 7.1$  Hz, 1H), 3.64 – 3.52 (m, 2H), 2.44 (dtd,  $J = 13.2, 6.9, 2.9$  Hz, 1H), 2.19 (dddd,  $J = 12.8, 11.1, 9.3,$

7.1 Hz, 1H), 2.11 – 1.85 (m, 2H), 1.54 (d,  $J = 7.2$  Hz, 3H).  $^{13}\text{C}$  NMR ( $\text{CDCl}_3$ , 75 MHz):  $\delta$  167.5, 166.0, 152.0, 134.8, 128.8, 128.4, 69.4, 59.5, 57.7, 45.7, 29.3, 22.8, 17.4. HRMS (ESI): calcd for  $\text{C}_{16}\text{H}_{18}\text{N}_2\text{O}_4\text{Na}$   $[\text{M} + \text{Na}]^+$  325.1158, found 325.1163

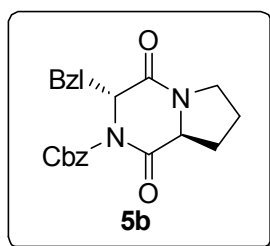

**Cyclo-[Cbz-D-Phe-L-Pro] (5b).** Sticky oil, 141 mg, 0.37 mmol, 53%

yield.  $^1\text{H}$  NMR ( $\text{CDCl}_3$ , 300 MHz):  $\delta$  7.39 – 6.97 (m, 10H), 5.25 – 5.09 (m, 2H), 5.00 (dd,  $J = 5.0, 5.0$  Hz, 1H), 3.44 (ddd,  $J = 12.2, 8.9, 7.2$  Hz, 1H), 3.30 (ddd,  $J = 12.0, 9.2, 2.8$  Hz, 1H), 3.23 – 3.03 (m, 2H), 2.54 (dd,

$J = 9.6, 6.5$  Hz, 1H), 2.12 – 1.86 (m, 1H), 1.86 – 1.64 (m, 2H), 1.63 – 1.42 (m, 1H).  $^{13}\text{C}$  NMR ( $\text{CDCl}_3$ , 75 MHz):  $\delta$  167.3, 164.2, 152.0, 135.0, 134.7, 130.1, 128.8, 128.7, 128.6, 128.4, 128.3, 128.1, 127.9, 127.7, 69.2, 67.7, 62.5, 58.8, 45.1, 38.4, 29.7, 29.3, 28.1, 25.6, 22.0. HRMS (ESI): calcd for  $\text{C}_{22}\text{H}_{22}\text{N}_2\text{O}_4\text{Na}$   $[\text{M} + \text{Na}]^+$  401.1471, found 401.1473

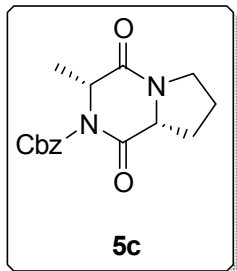

**Cyclo-[Cbz-D-Ala-D-Pro] (5c).** Sticky oil, 198 mg, 0.66 mmol, 79% yield.

$^1\text{H}$  NMR ( $\text{CDCl}_3$ , 500 MHz):  $\delta$  7.47 – 7.27 (m, 5H), 5.29 (s, 2H), 4.86 (q,  $J$  = 7.2 Hz, 1H), 4.19 (dd,  $J$  = 9.3, 7.0 Hz, 1H), 3.66 – 3.44 (m, 2H), 2.42 (ddd,  $J$  = 13.4, 6.9, 2.9 Hz, 1H), 2.26 – 2.09 (m, 1H), 2.09 – 1.96 (m, 1H), 1.96 – 1.82 (m, 1H), 1.52 (d,  $J$  = 7.2 Hz, 3H).  $^{13}\text{C}$  NMR ( $\text{CDCl}_3$ , 125 MHz):

$\delta$  167.6, 163.9, 152.1, 134.7, 128.9, 128.7, 128.6, 128.5, 69.6, 67.3, 57.9, 53.6, 45.8, 33.5, 29.9, 22.8, 20.1, 19.9. HRMS (ESI): calcd for  $\text{C}_{16}\text{H}_{18}\text{N}_2\text{O}_4\text{Na}$   $[\text{M} + \text{Na}]^+$  325.1158, found 325.1159

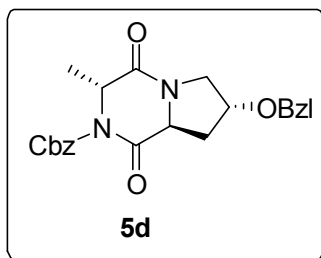

**Cyclo-[Cbz-D-Ala-L-Hyp(OBzl)] (5d).** Sticky oil, 190 mg, 0.46

mmol, 70% yield.  $^1\text{H}$  NMR ( $\text{CDCl}_3$ , 500 MHz):  $\delta$  7.47 – 7.22 (m, 10H), 5.30 (s, 2H), 5.21 – 5.03 (m, 1H), 4.89 (dd,  $J$  = 7.0, 6.6 Hz, 1H), 4.54 (s, 2H), 4.26 – 4.18 (m, 1H), 3.71 (dd,  $J$  = 14.5, 13.9 Hz, 1H), 2.66 (dd,  $J$  = 13.7, 6.3 Hz, 1H), 2.20 – 2.09 (m, 2H), 1.55 (d,  $J$

= 6.9 Hz, 3H).  $^{13}\text{C}$  NMR ( $\text{CDCl}_3$ , 125 MHz):  $\delta$  167.6, 166.1, 151.9, 137.3, 134.8, 128.8, 128.7, 128.6, 128.4, 128.2, 127.9, 75.0, 71.2, 69.4, 67.3, 58.1, 57.6, 51.7, 35.5, 18.7, 17.5. HRMS (ESI): calcd for  $\text{C}_{23}\text{H}_{24}\text{N}_2\text{O}_5\text{Na}$   $[\text{M} + \text{Na}]^+$  431.1577, found 431.1573

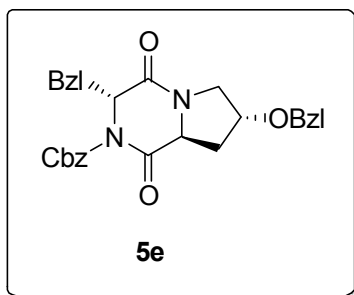

**Cyclo-[Cbz-D-Phe-L-Hyp(OBzl)] (5e).** Sticky oil, 140 mg, 0.29

mmol, 50% yield.  $^1\text{H}$  NMR ( $\text{CDCl}_3$ , 300 MHz):  $\delta$  7.45 – 7.06 (m, 15H), 5.35 – 5.20 (m, 1H), 5.18 – 4.95 (m, 2H), 4.53 – 4.29 (m, 2H), 3.81 – 3.53 (m, 1H), 3.34 – 3.16 (m, 1H), 3.09 (dd,  $J$  = 10.5, 4.5 Hz, 1H), 3.01 (dd,  $J$  = 11.2, 5.6 Hz, 1H), 2.35 (dd,  $J$  = 13.6,

6.0 Hz, 1H), 2.34 – 2.20 (m, 1H), 2.16 – 1.97 (m, 1H), 1.84 (ddd,  $J$  = 13.5, 11.3, 4.4 Hz, 1H).  $^{13}\text{C}$  NMR ( $\text{CDCl}_3$ , 75 MHz):  $\delta$  167.7, 164.6, 155.9, 152.2, 137.5, 135.8, 134.9, 130.1, 129.5, 129.1, 128.9, 128.8, 128.7, 128.6, 128.3, 128.2, 128.1, 127.9, 127.8, 127.4, 76.2, 74.5, 71.6, 70.8, 69.5,



67.2, 62.7, 58.5, 57.6, 51.7, 39.1, 38.6, 35.5, 28.3. HRMS (ESI): calcd for  $C_{29}H_{28}N_2O_5Na$   $[M + Na]^+$  507.1890, found 507.1885

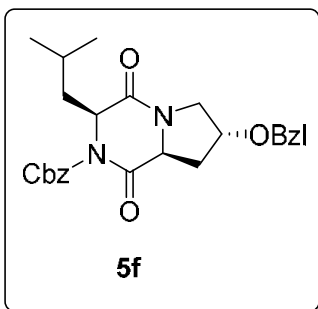

**Cyclo-[Cbz-L-Leu-L-Hyp(OBzl)] (5f).** Sticky oil, 210 mg, 0.47 mmol, 76% yield.  $^1H$  NMR ( $CDCl_3$ , 500 MHz):  $\delta$  7.46 – 7.12 (m, 10H), 5.34 – 5.21 (m, 2H), 5.22 – 5.02 (m, 1H), 4.88 (dd,  $J = 7.7, 7.7$  Hz, 1H), 4.58 – 4.48 (m, 2H), 4.46 – 4.33 (m, 1H), 4.25 – 4.12 (m, 1H), 3.82 – 3.59 (m, 1H), 2.66 (dd,  $J = 13.6, 6.6$  Hz, 1H), 2.18 – 2.00 (m, 1H), 1.79 – 1.67 (m, 1H), 1.67 – 1.56 (m, 1H), 1.30 – 1.17 (m, 1H), 0.97 (d,  $J = 5.6$  Hz, 3H), 0.93 (d,  $J = 5.7$  Hz, 3H).  $^{13}C$  NMR ( $CDCl_3$ , 125 MHz):  $\delta$  168.2, 165.5, 152.1, 137.4, 134.8, 128.8, 128.6, 128.3, 127.9, 75.1, 71.2, 69.5, 61.5, 60.0, 58.3, 52.7, 51.7, 42.0, 41.9, 41.3, 35.8, 24.9, 23.5, 23.0, 22.0. HRMS (ESI): calcd for  $C_{26}H_{30}N_2O_5Na$   $[M + Na]^+$  473.2046, found 473.2047

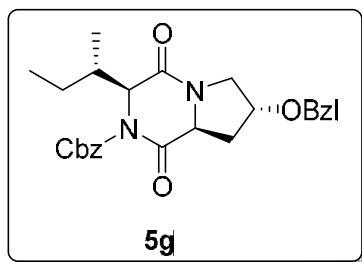

**Cyclo-[Cbz-L-Ile-L-Hyp(OBzl)] (5g).** Sticky oil, 227 mg, 0.50 mmol, 82% yield.  $^1H$  NMR ( $CDCl_3$ , 300 MHz):  $\delta$  7.46 – 7.19 (m, 10H), 5.44 – 5.22 (m, 1H), 5.21 – 4.99 (m, 3H), 4.55 – 4.45 (m, 1H), 4.45 – 4.27 (m, 2H), 4.17 – 4.04 (m, 1H), 3.45 – 3.30 (m, 1H), 2.12 – 1.99 (m, 1H), 1.98 – 1.69 (m, 1H), 1.64 – 1.35 (m, 2H), 1.35 – 1.06 (m, 3H), 1.05 – 0.71 (m, 4H).  $^{13}C$  NMR ( $CDCl_3$ , 75 MHz):  $\delta$  176.7, 176.2, 167.7, 166.3, 156.4, 152.6, 137.4, 136.3, 134.9, 128.7, 128.6, 128.3, 128.2, 128.0, 127.9, 74.3, 70.8, 69.4, 67.2, 65.4, 60.6, 58.2, 57.2, 51.5, 38.0, 37.6, 34.4, 29.8, 26.4, 25.7, 25.0, 20.9, 15.6, 14.5, 11.9, 11.3. HRMS (ESI): calcd for  $C_{26}H_{30}N_2O_5Na$   $[M + Na]^+$  473.2046, found 473.2049

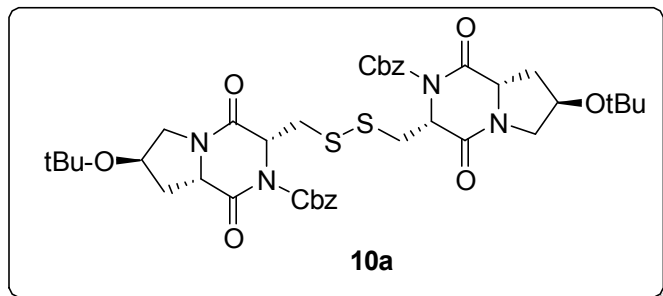

**Cyclo-[Bis-Cbz-L-Cys-L-Hyp(O-tBu)]**

**(10a).** Sticky oil, 227 mg, 0.28 mmol, 84% yield.  $^1\text{H}$  NMR ( $\text{CD}_3\text{OD}$ , 300 MHz):  $\delta$  7.51 – 7.22 (m, 10H), 5.48 (dd,  $J = 4.0$ , 2.0 Hz, 2H), 5.34 (s, 4H), 4.59 (dd,  $J =$

5.5, 4.1 Hz, 2H), 3.78 (dd,  $J = 11.6$ , 5.6 Hz, 2H), 3.59 (dd,  $J = 11.8$ , 4.1 Hz, 2H), 3.47 (dd,  $J = 14.3$ , 4.5 Hz, 2H), 3.35 (dd,  $J = 4.2$ , 0.9 Hz, 2H), 2.88 (dd,  $J = 14.2$ , 5.2, 1.0 Hz, 2H), 2.33 (dd,  $J = 14.2$ , 5.8 Hz, 2H), 2.23 – 2.20 (m, 2H), 1.21 (s, 18H).  $^{13}\text{C}$  NMR ( $\text{CD}_3\text{OD}$ , 75 MHz):  $\delta$  168.6, 167.3, 166.3, 164.7, 152.5, 136.7, 136.6, 131.6, 130.1, 130.0, 129.7, 129.6, 129.4, 127.2, 75.9, 71.6, 70.6, 69.2, 60.1, 59.2, 57.0, 55.5, 52.7, 39.8, 38.6, 34.0, 32.4, 28.7. HRMS (ESI): calcd for  $\text{C}_{40}\text{H}_{50}\text{N}_4\text{O}_{10}\text{S}_2\text{Na}$   $[\text{M} + \text{Na}]^+$  833.2860, found 833.2862

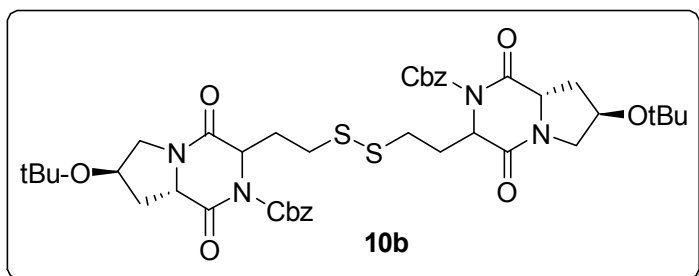

**Cyclo-[Bis-Cbz-Homo-D,L-Cys-L-**

**Hyp(O-tBu)] (10b).** Sticky oil, 240 mg, 0.29 mmol, 88% yield.  $^1\text{H}$  NMR ( $\text{CD}_3\text{OD}$ , 500 MHz):  $\delta$  7.49 – 7.25 (m,

10H), 5.35 – 5.24 (m, 4H), 4.98 – 4.87 (m, 2H), 4.72 – 4.50 (m, 2H), 4.48 – 4.33 (m, 2H), 3.80 – 3.69 (m, 2H), 3.60 – 3.38 (m, 2H), 2.83 – 2.65 (m, 4H), 2.53 – 2.43 (m, 2H), 2.34 – 2.18 (m, 4H), 2.17 – 1.95 (m, 2H), 1.25 – 1.16 (m, 18H).  $^{13}\text{C}$  NMR ( $\text{CD}_3\text{OD}$ , 75 MHz):  $\delta$  172.1, 169.6, 169.0, 166.7, 153.5, 136.7, 136.6, 130.0, 129.8, 129.7, 129.6, 129.4, 129.2, 129.0, 121.2, 76.0, 75.6, 71.2, 70.4, 69.4, 68.9, 68.7, 67.7, 61.4, 60.2, 59.6, 59.0, 55.5, 53.9, 53.4, 44.8, 39.0, 37.8, 35.4, 35.3, 32.3, 30.9, 28.7, 28.6. HRMS (ESI): calcd for  $\text{C}_{42}\text{H}_{54}\text{N}_4\text{O}_{10}\text{S}_2\text{Na}$   $[\text{M} + \text{Na}]^+$  861.3173, found 861.3175

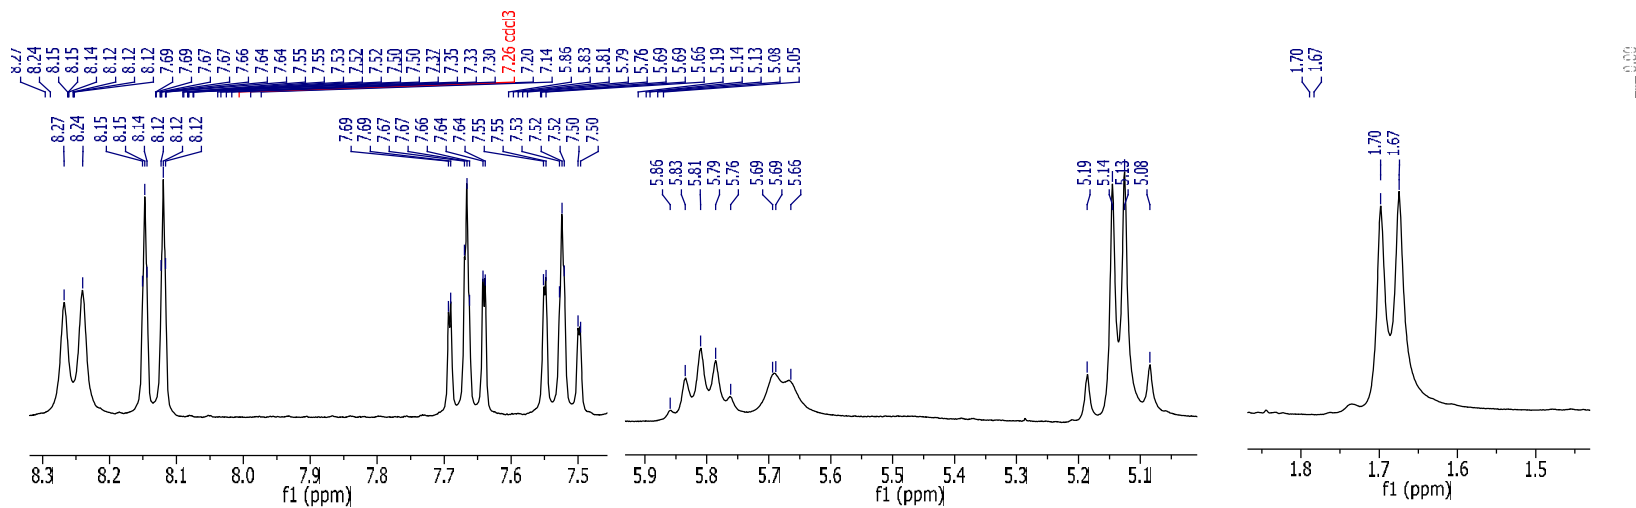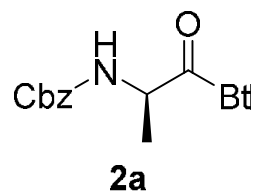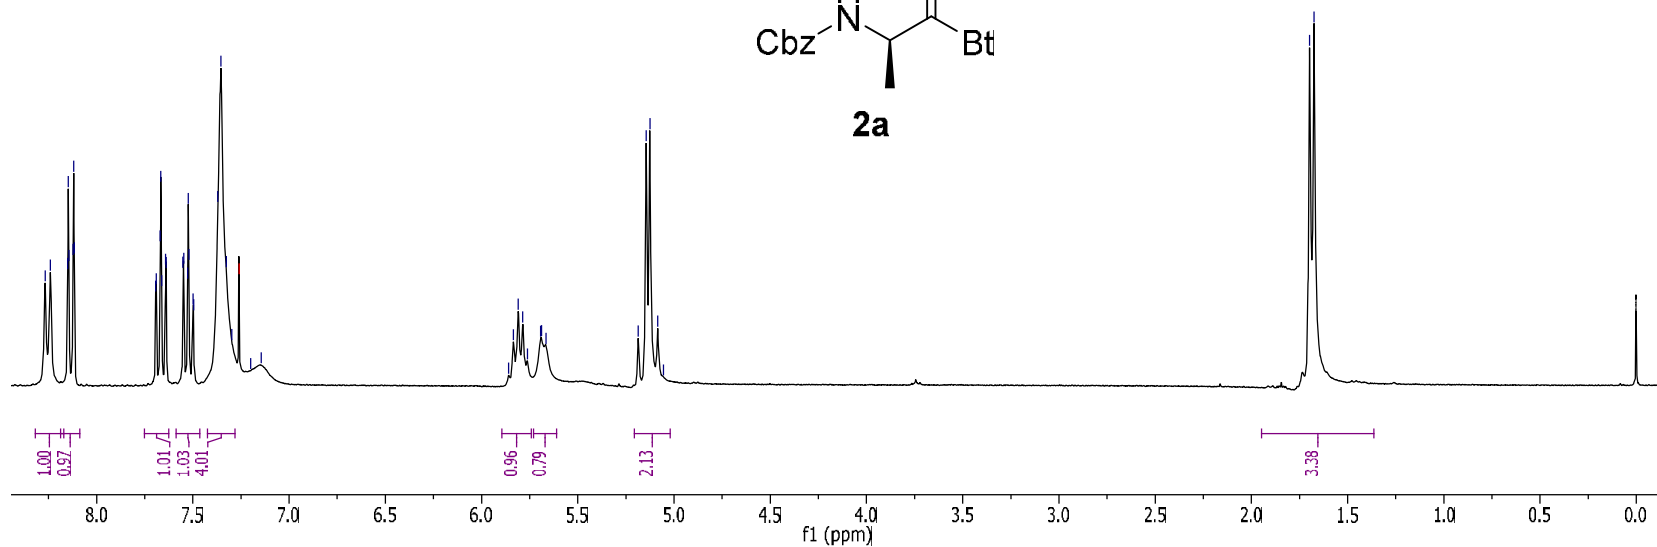

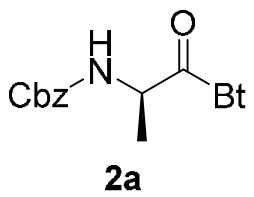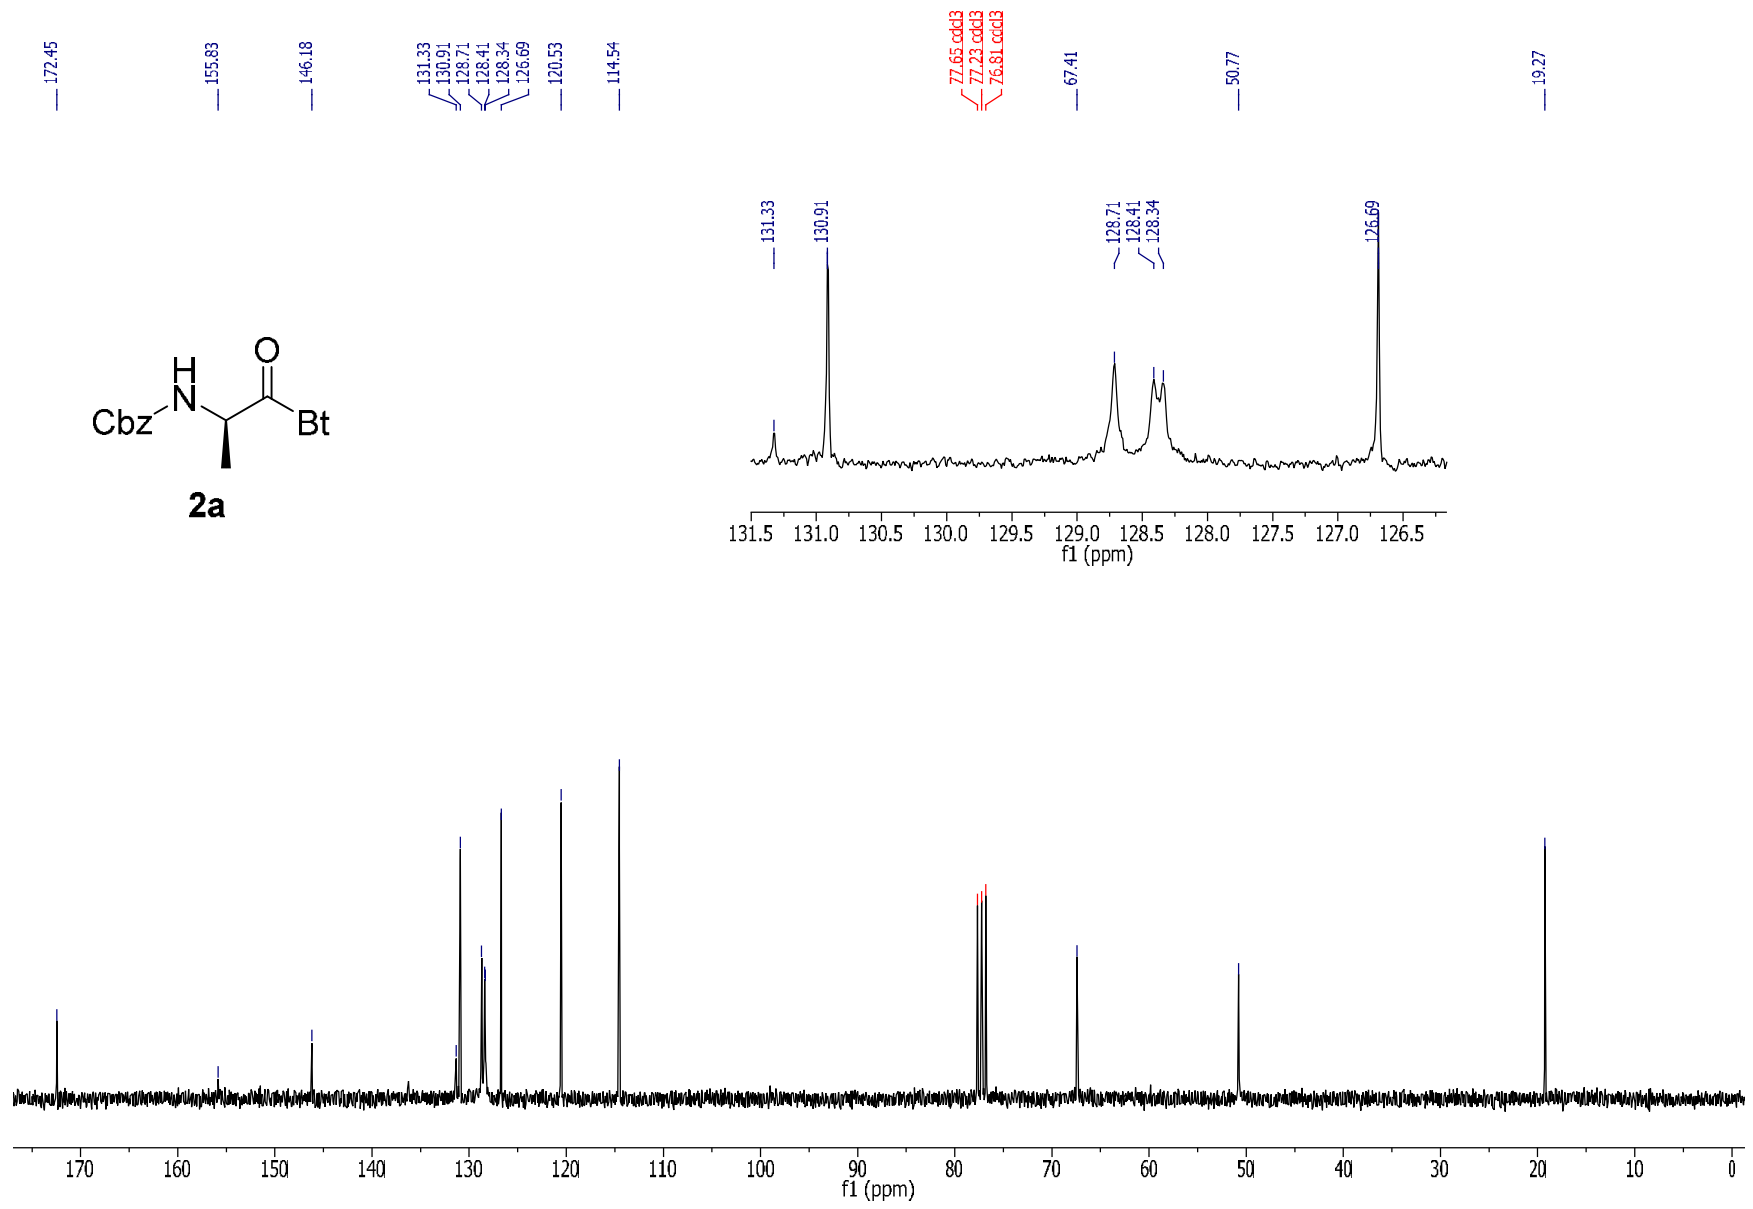

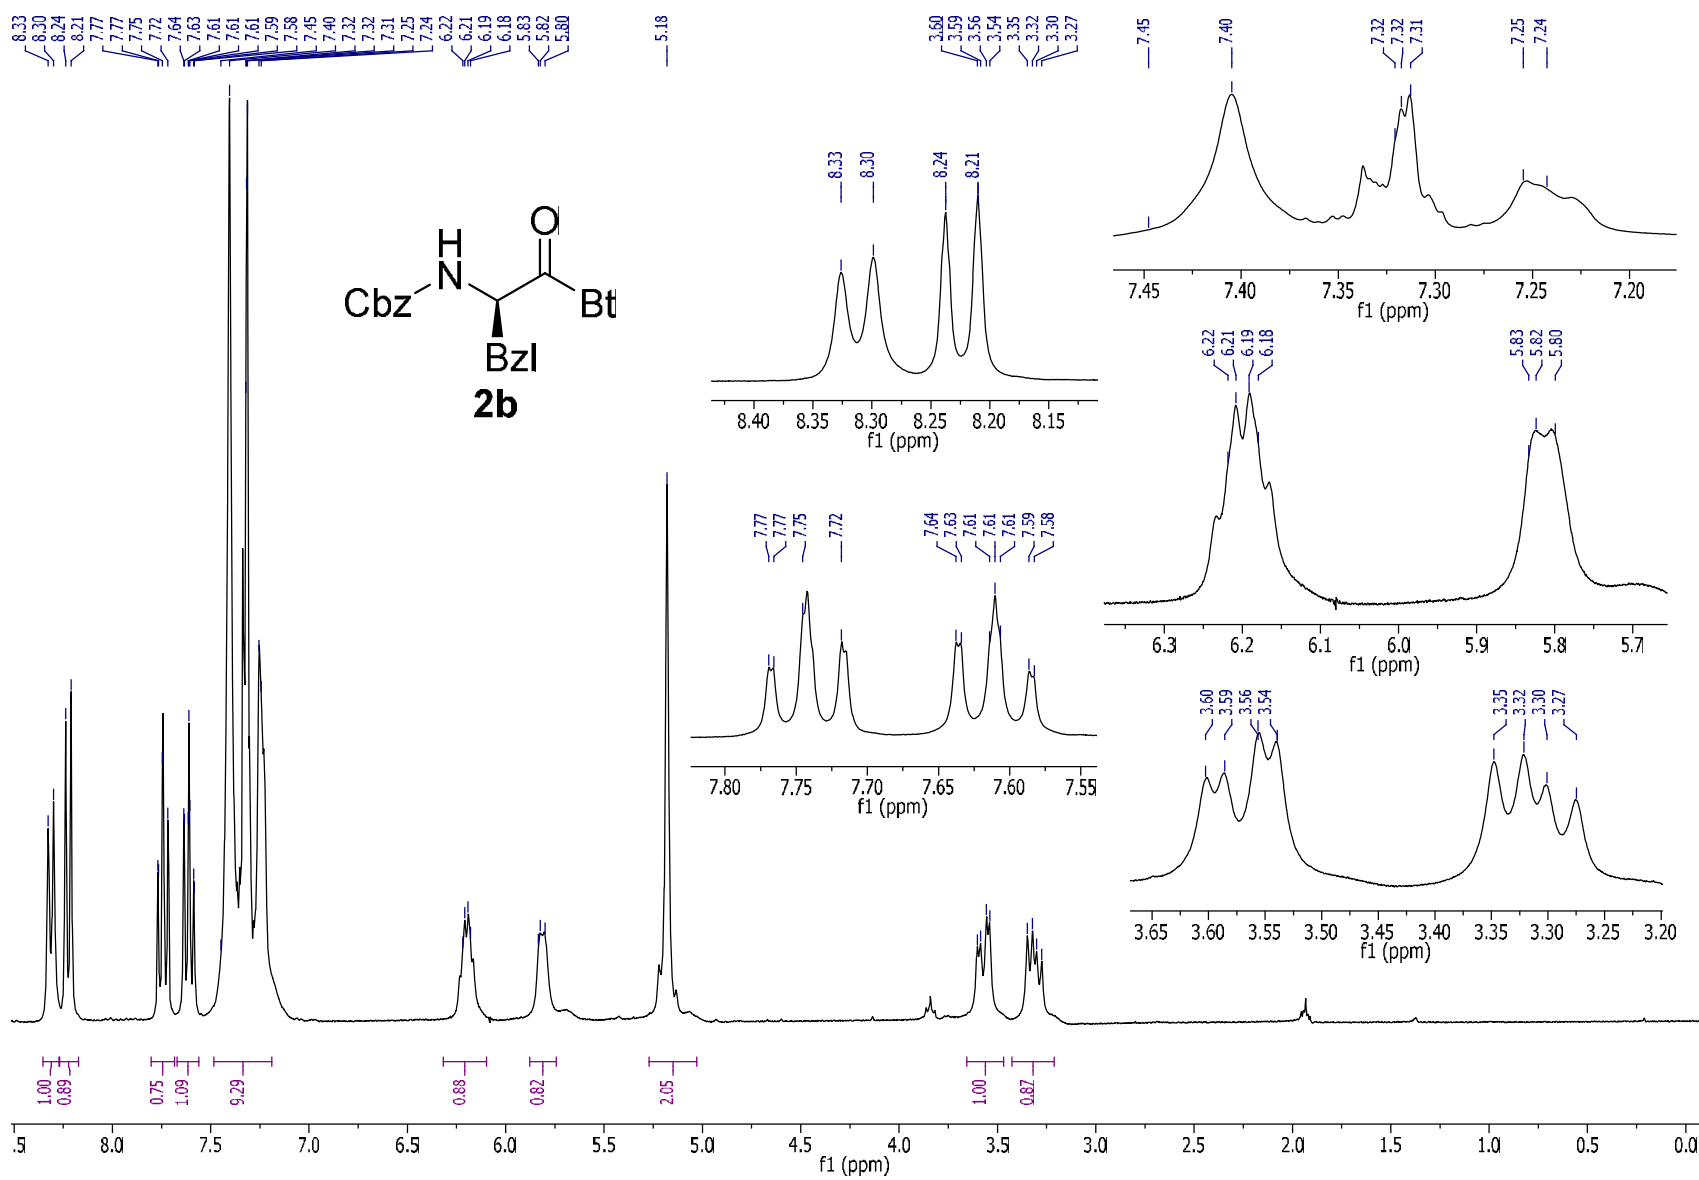

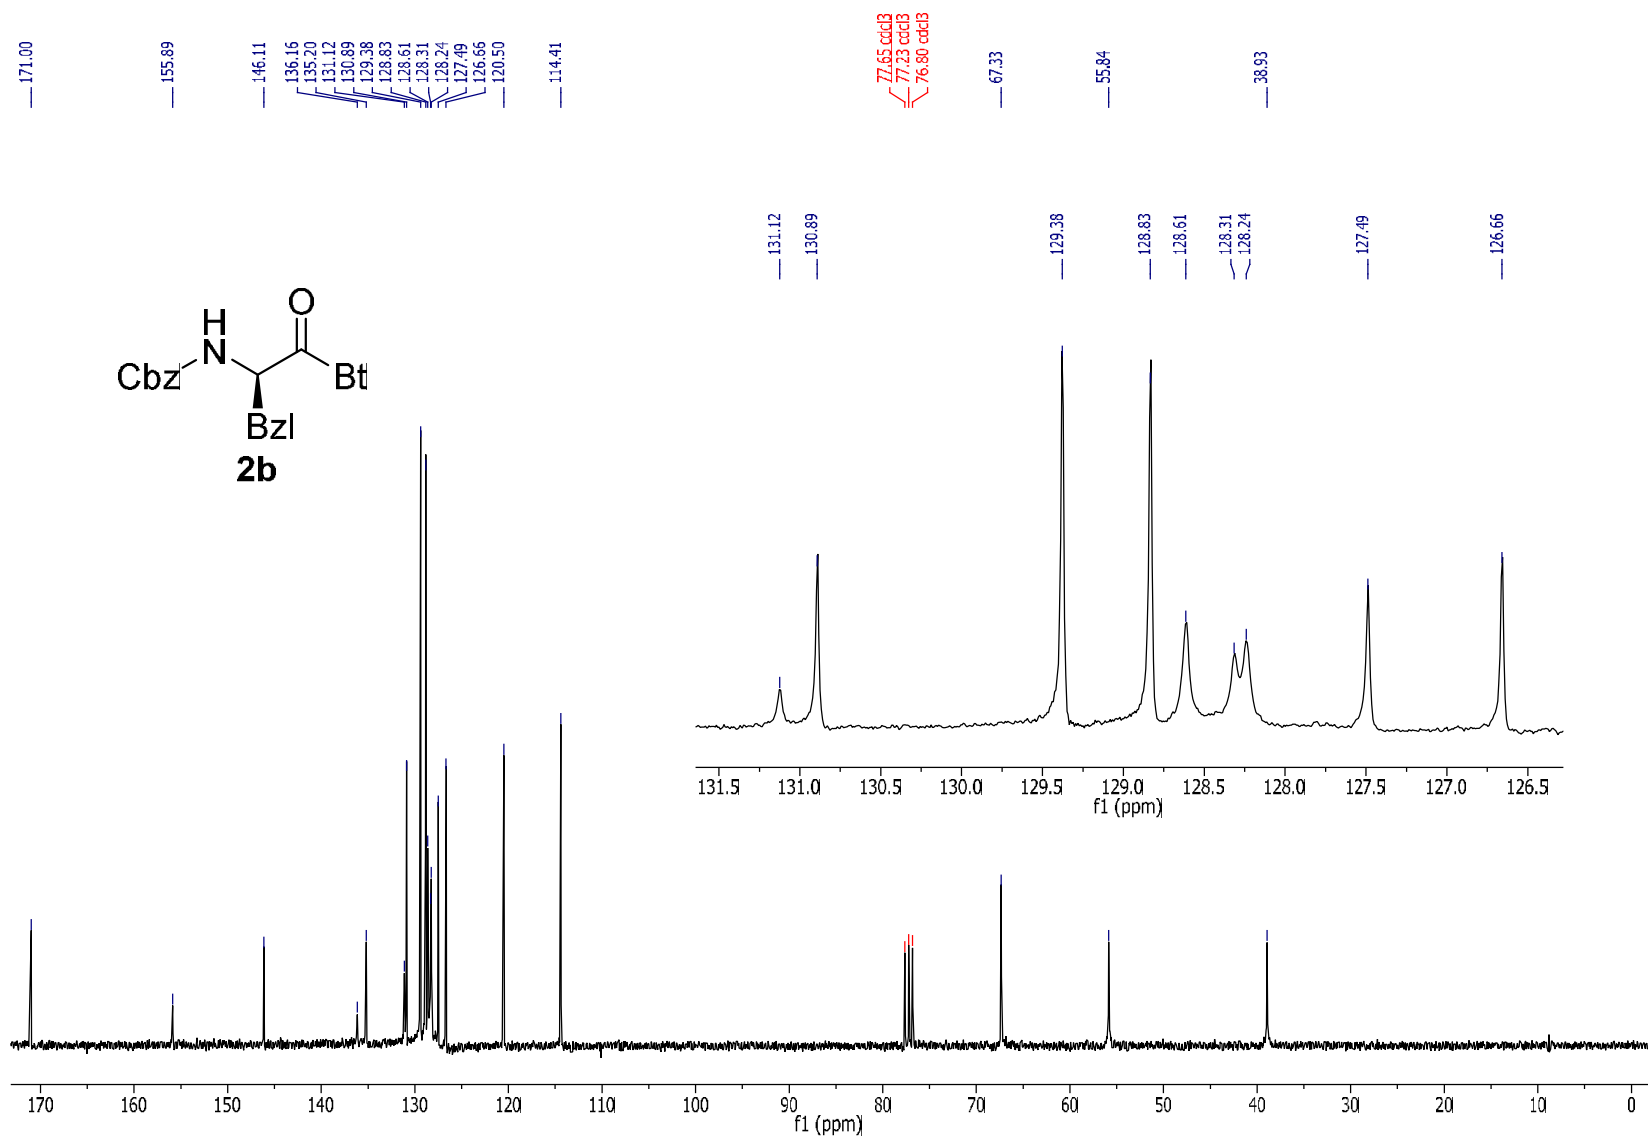

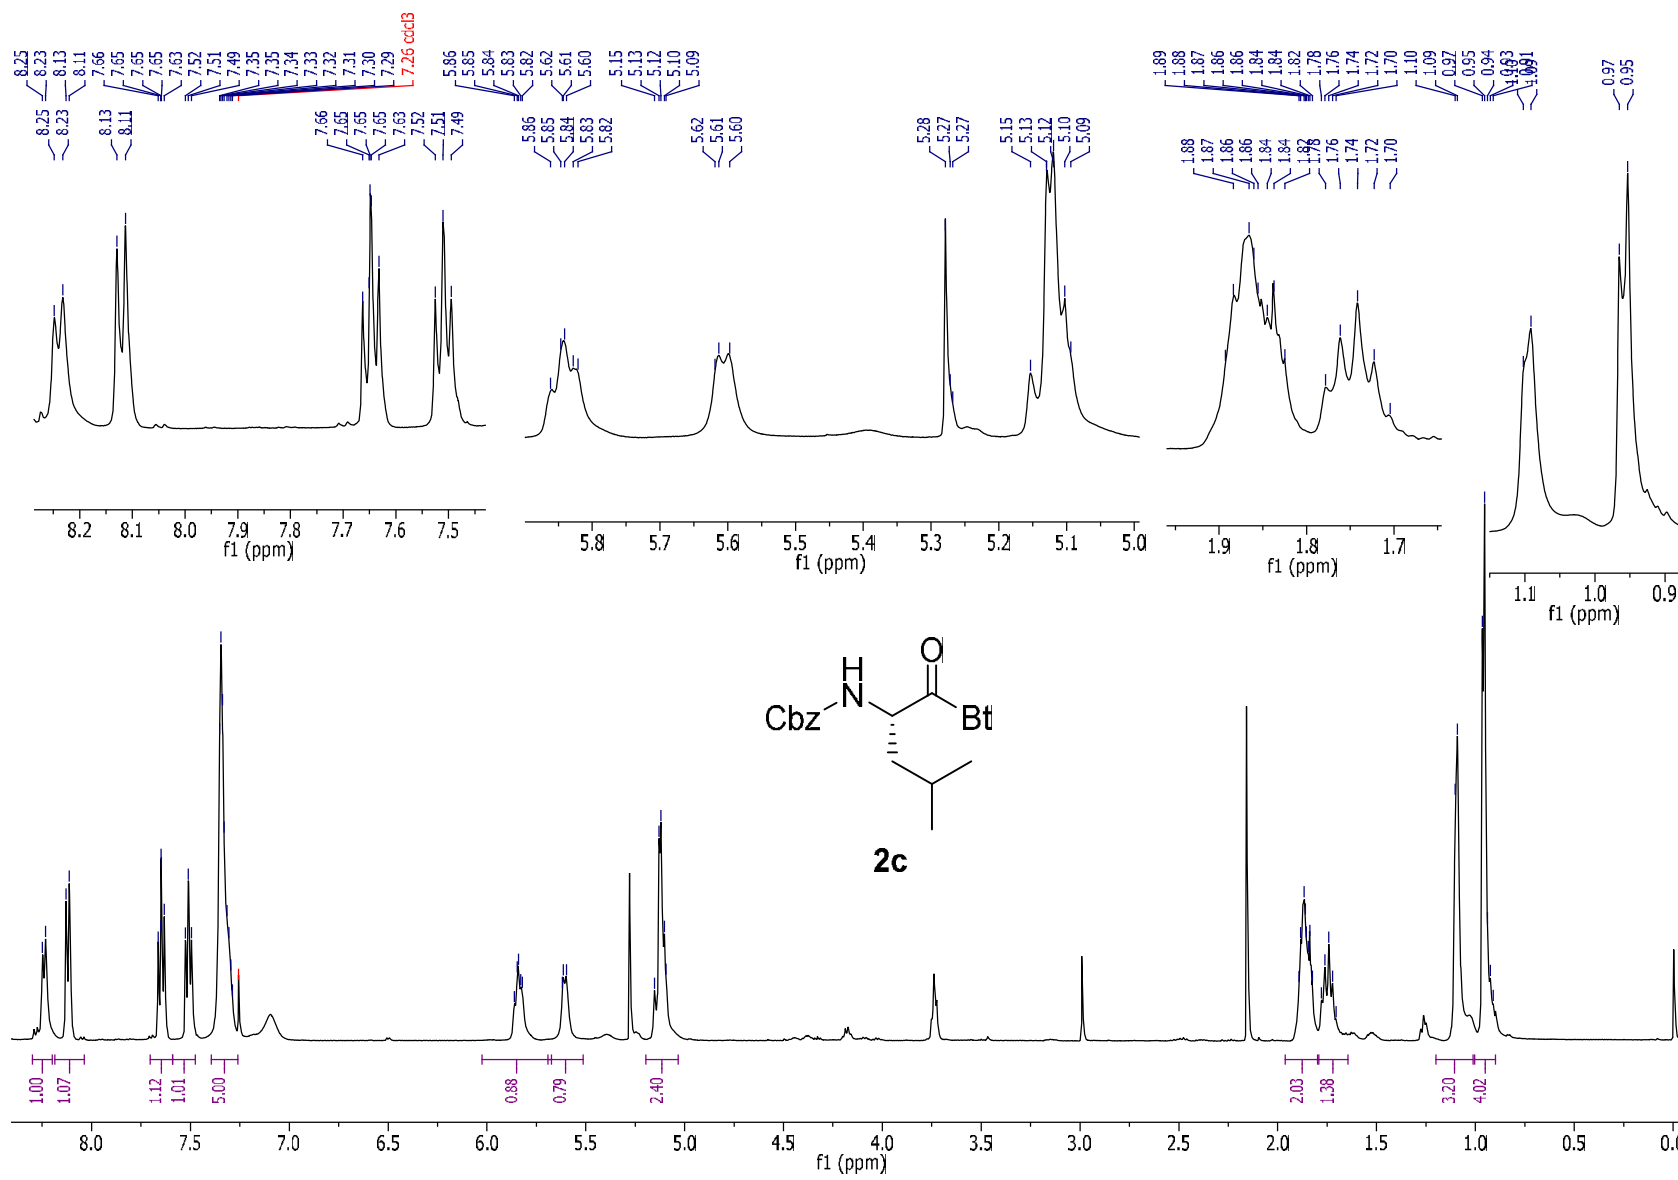

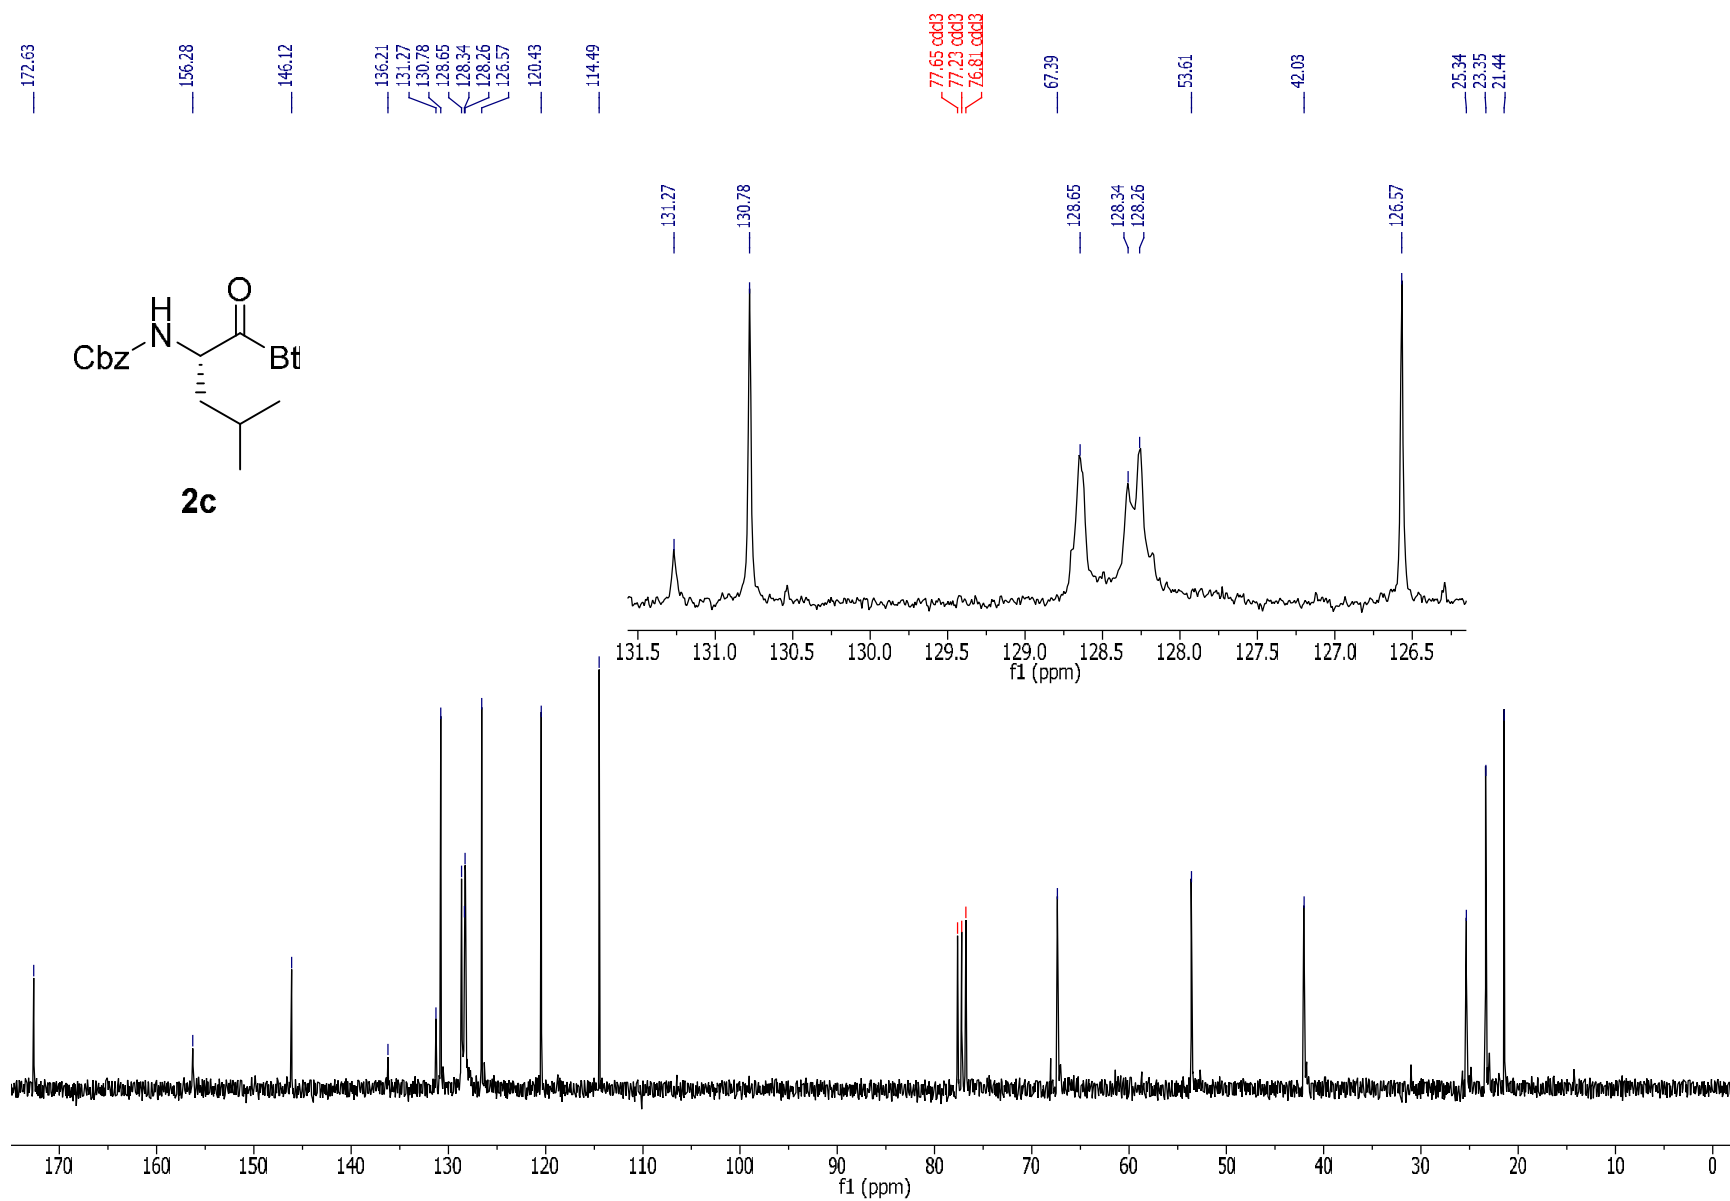



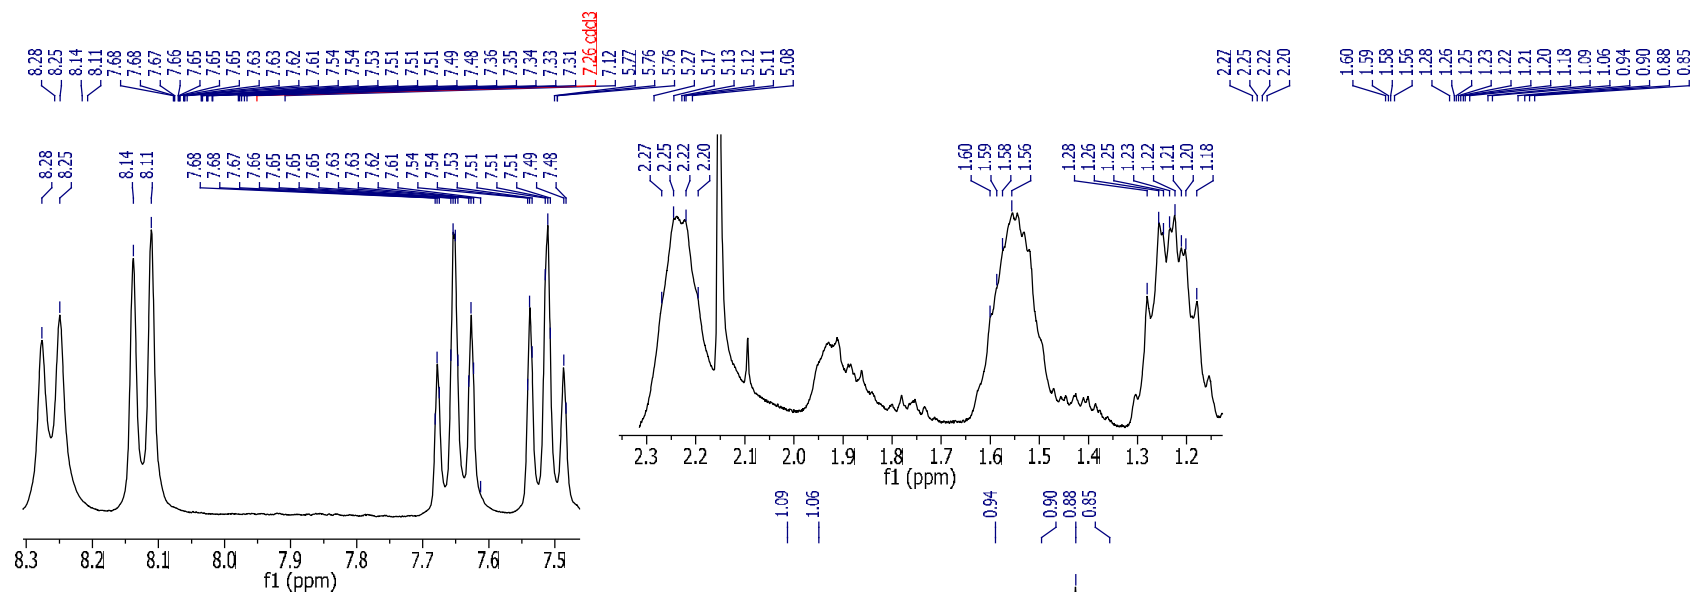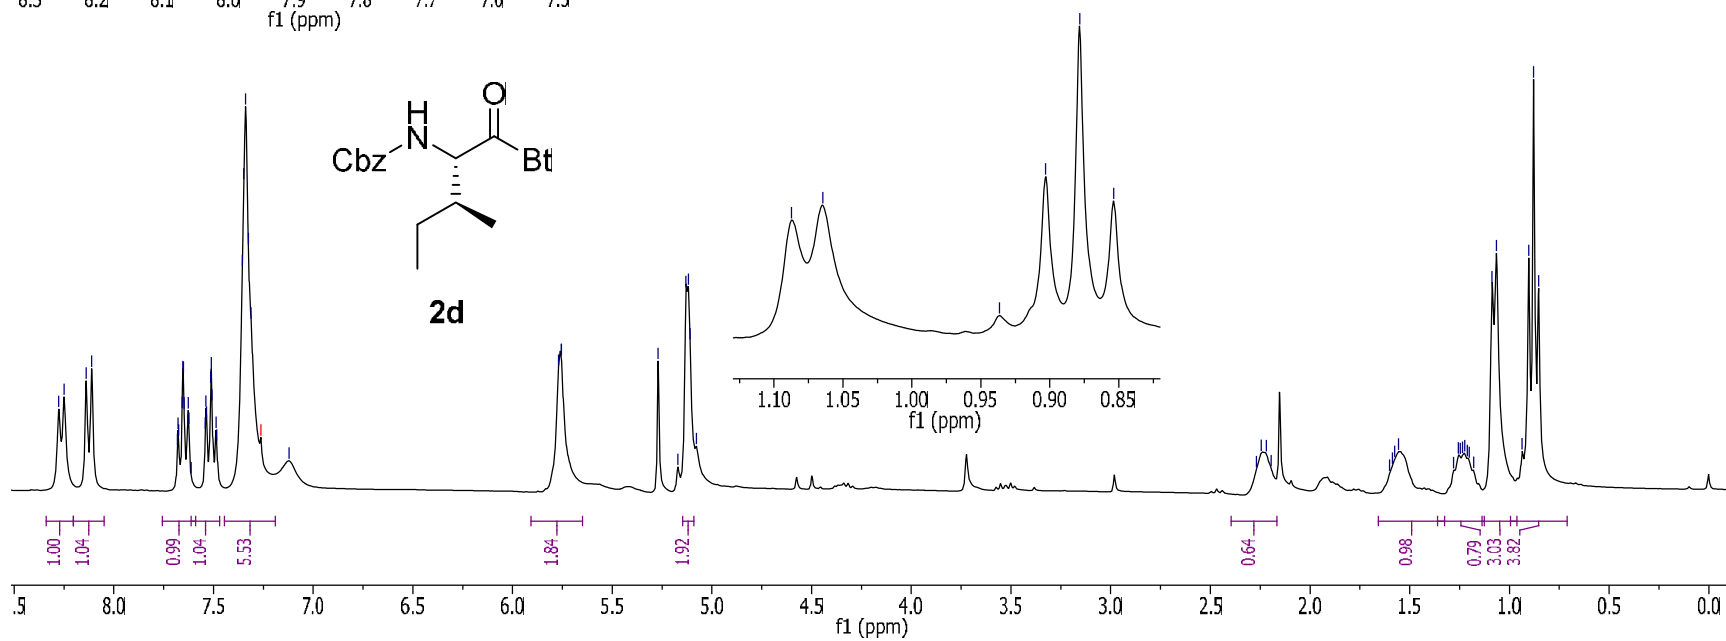

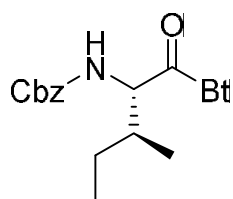

**2d**

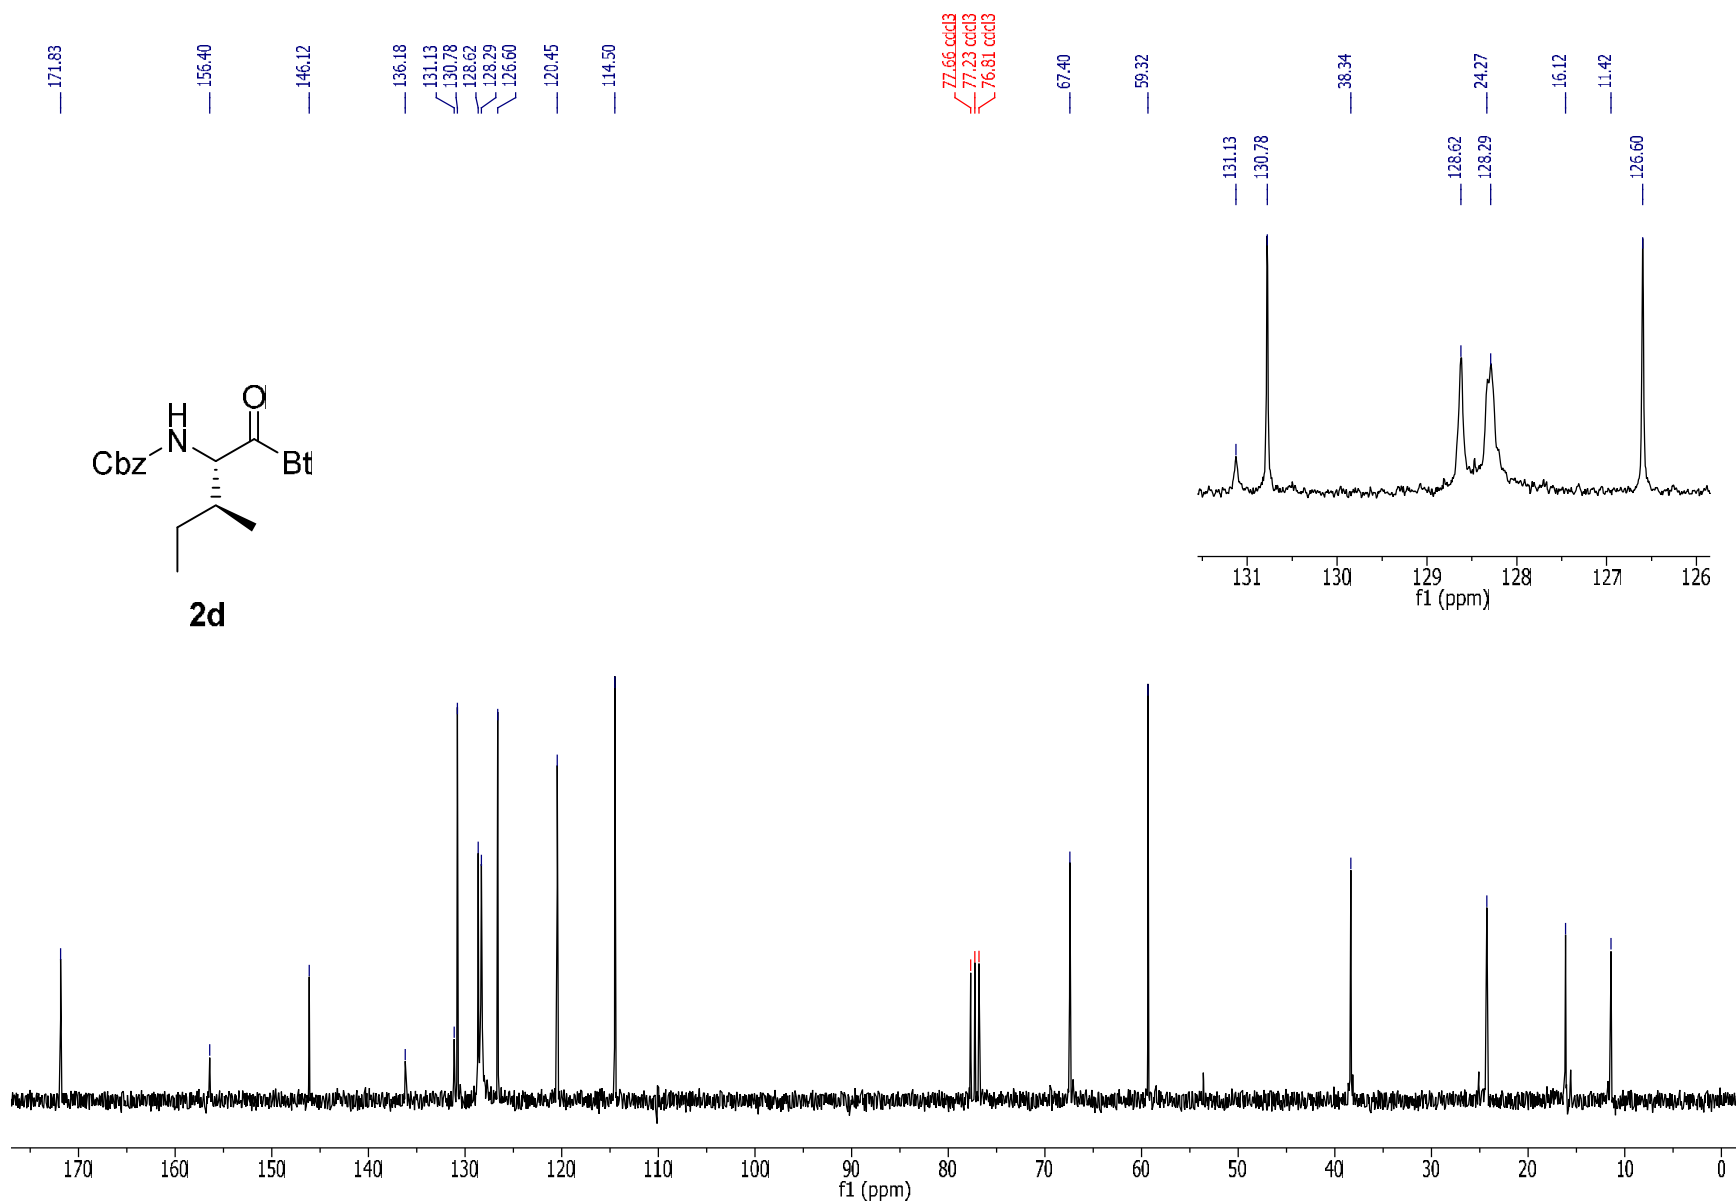

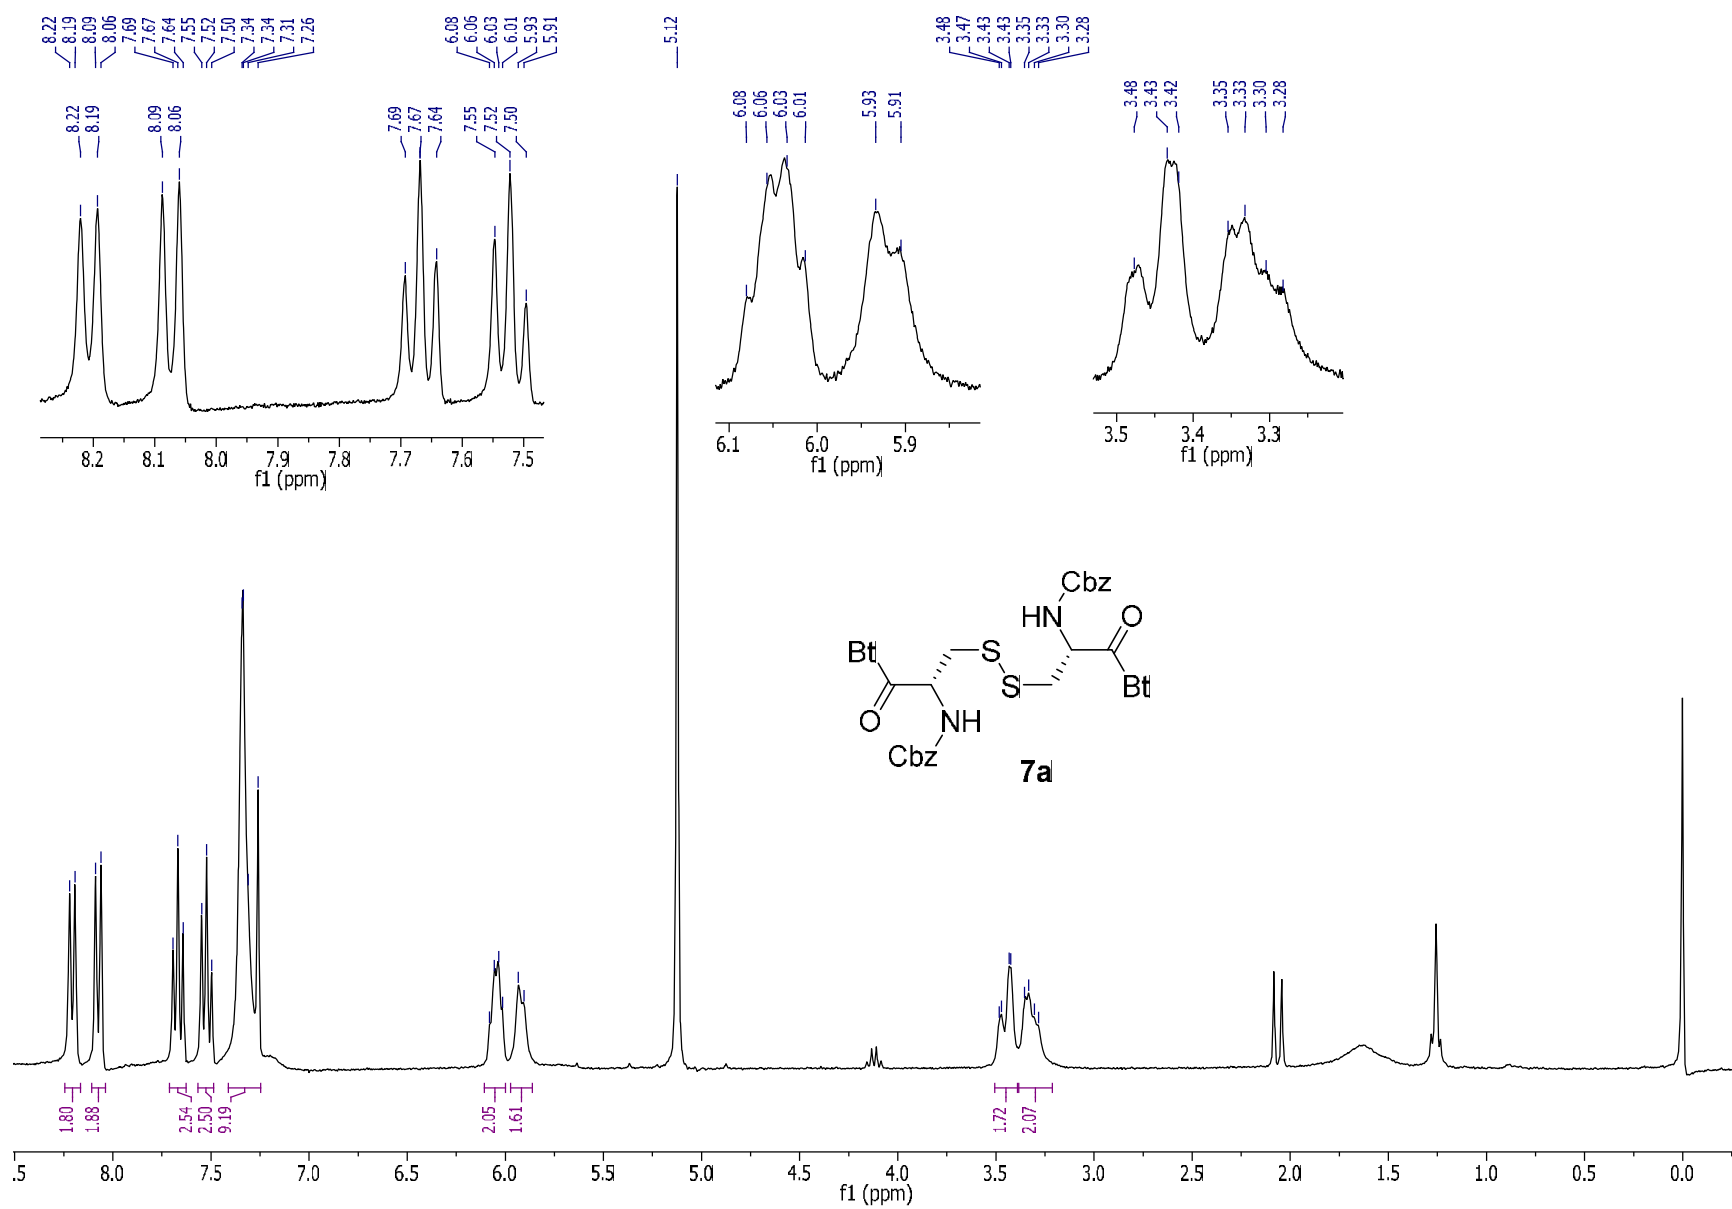

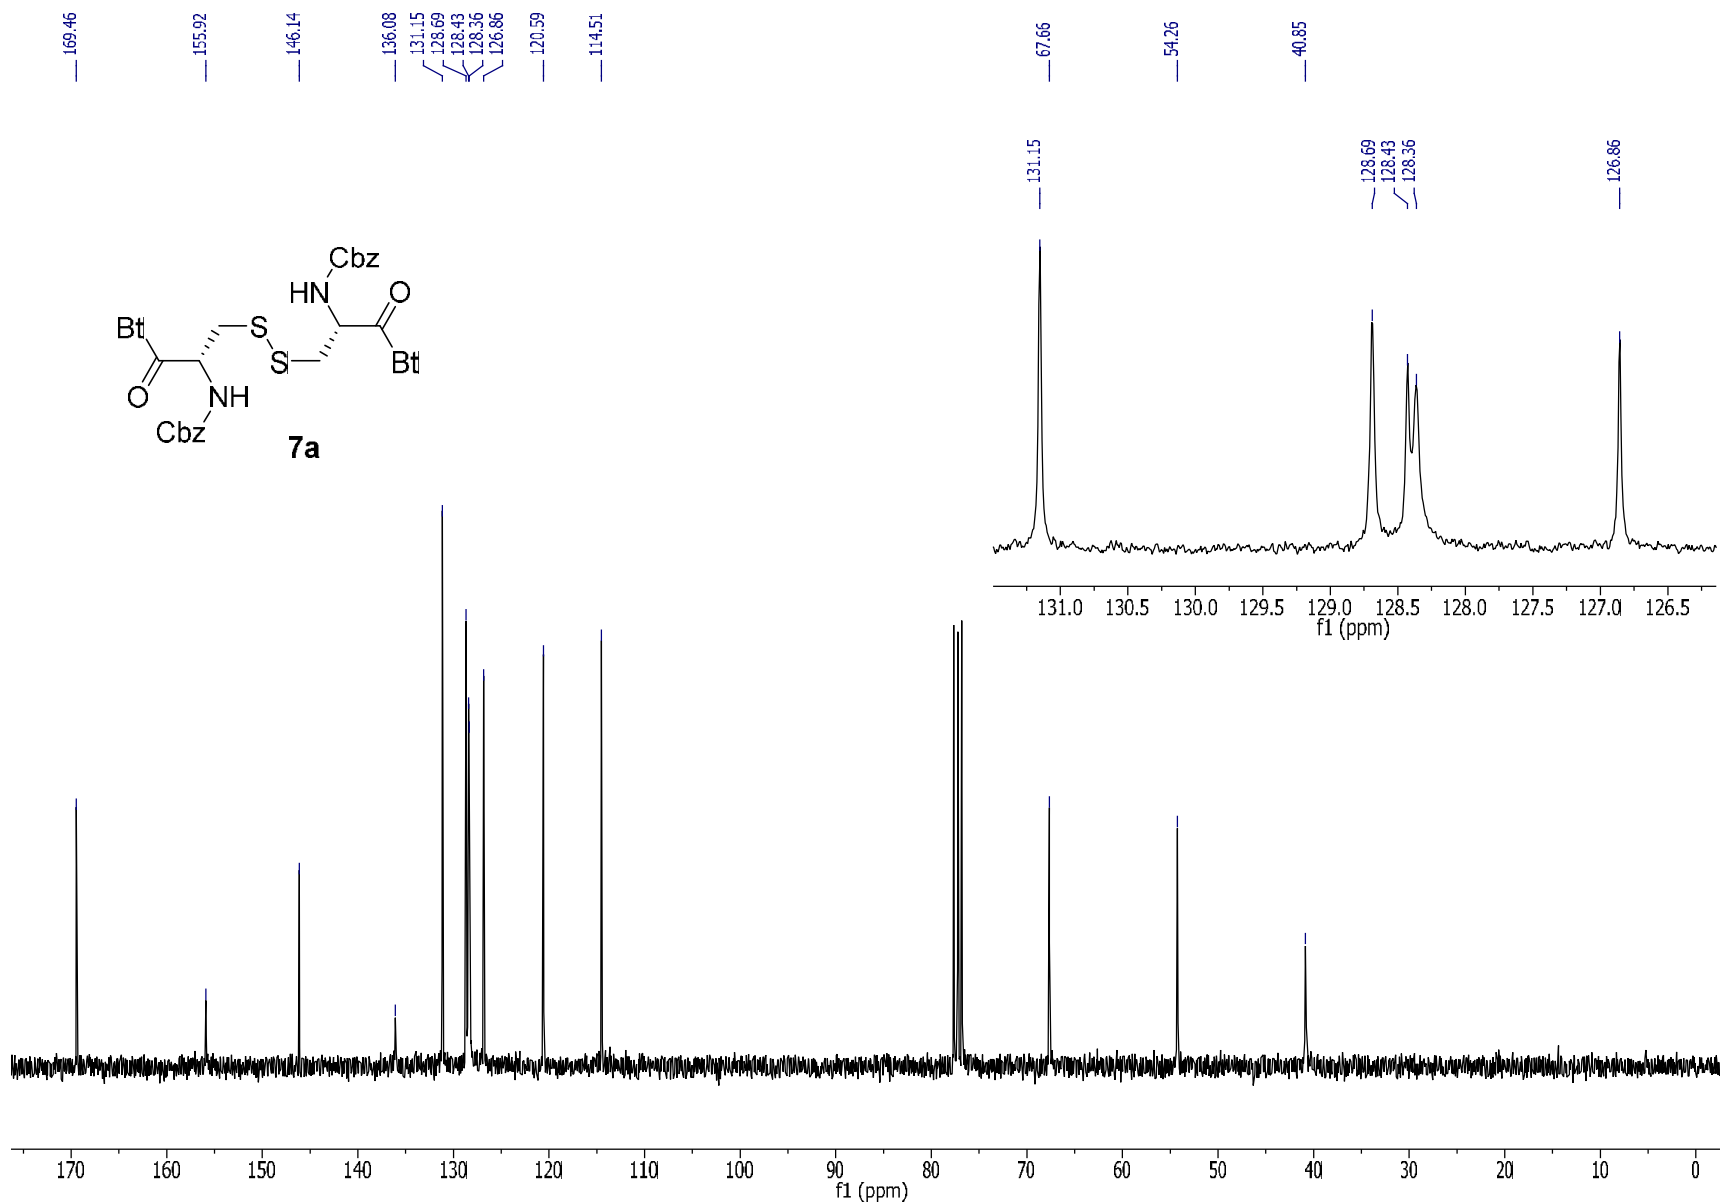

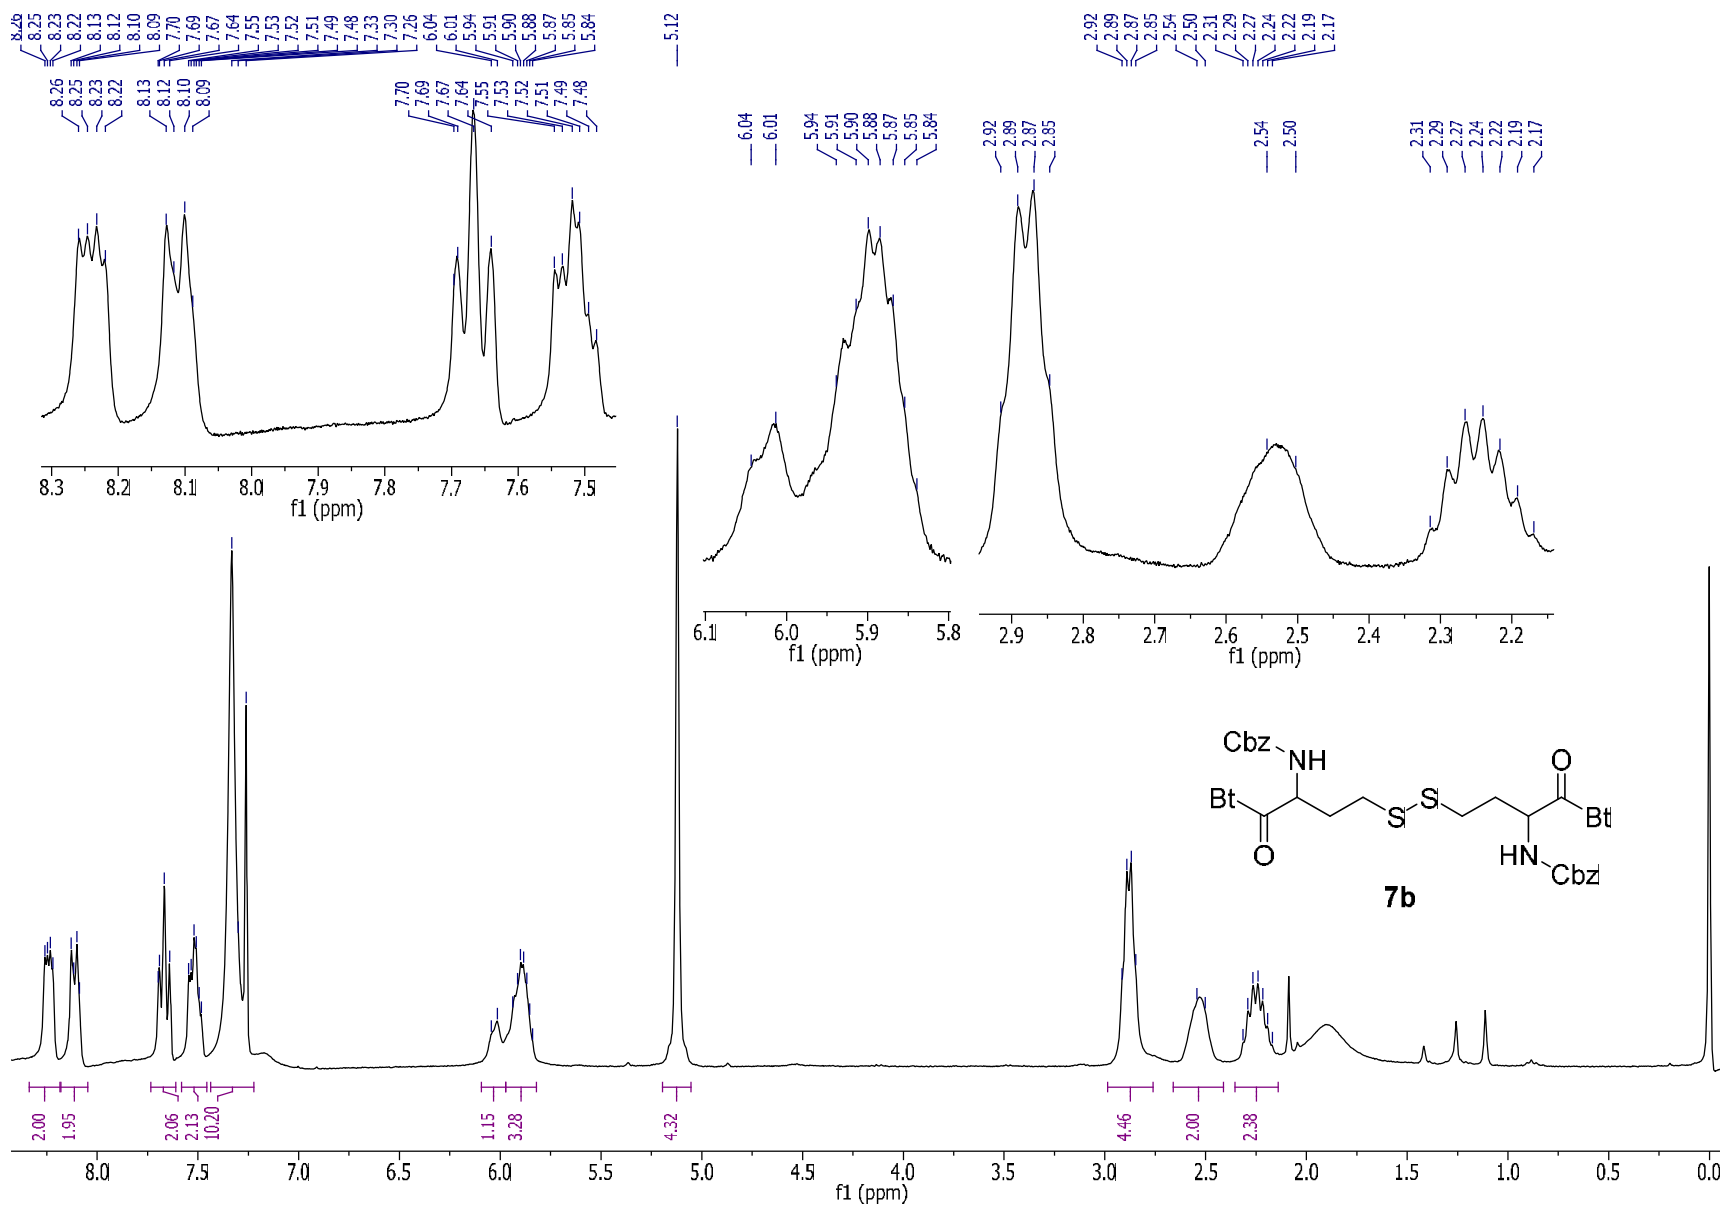

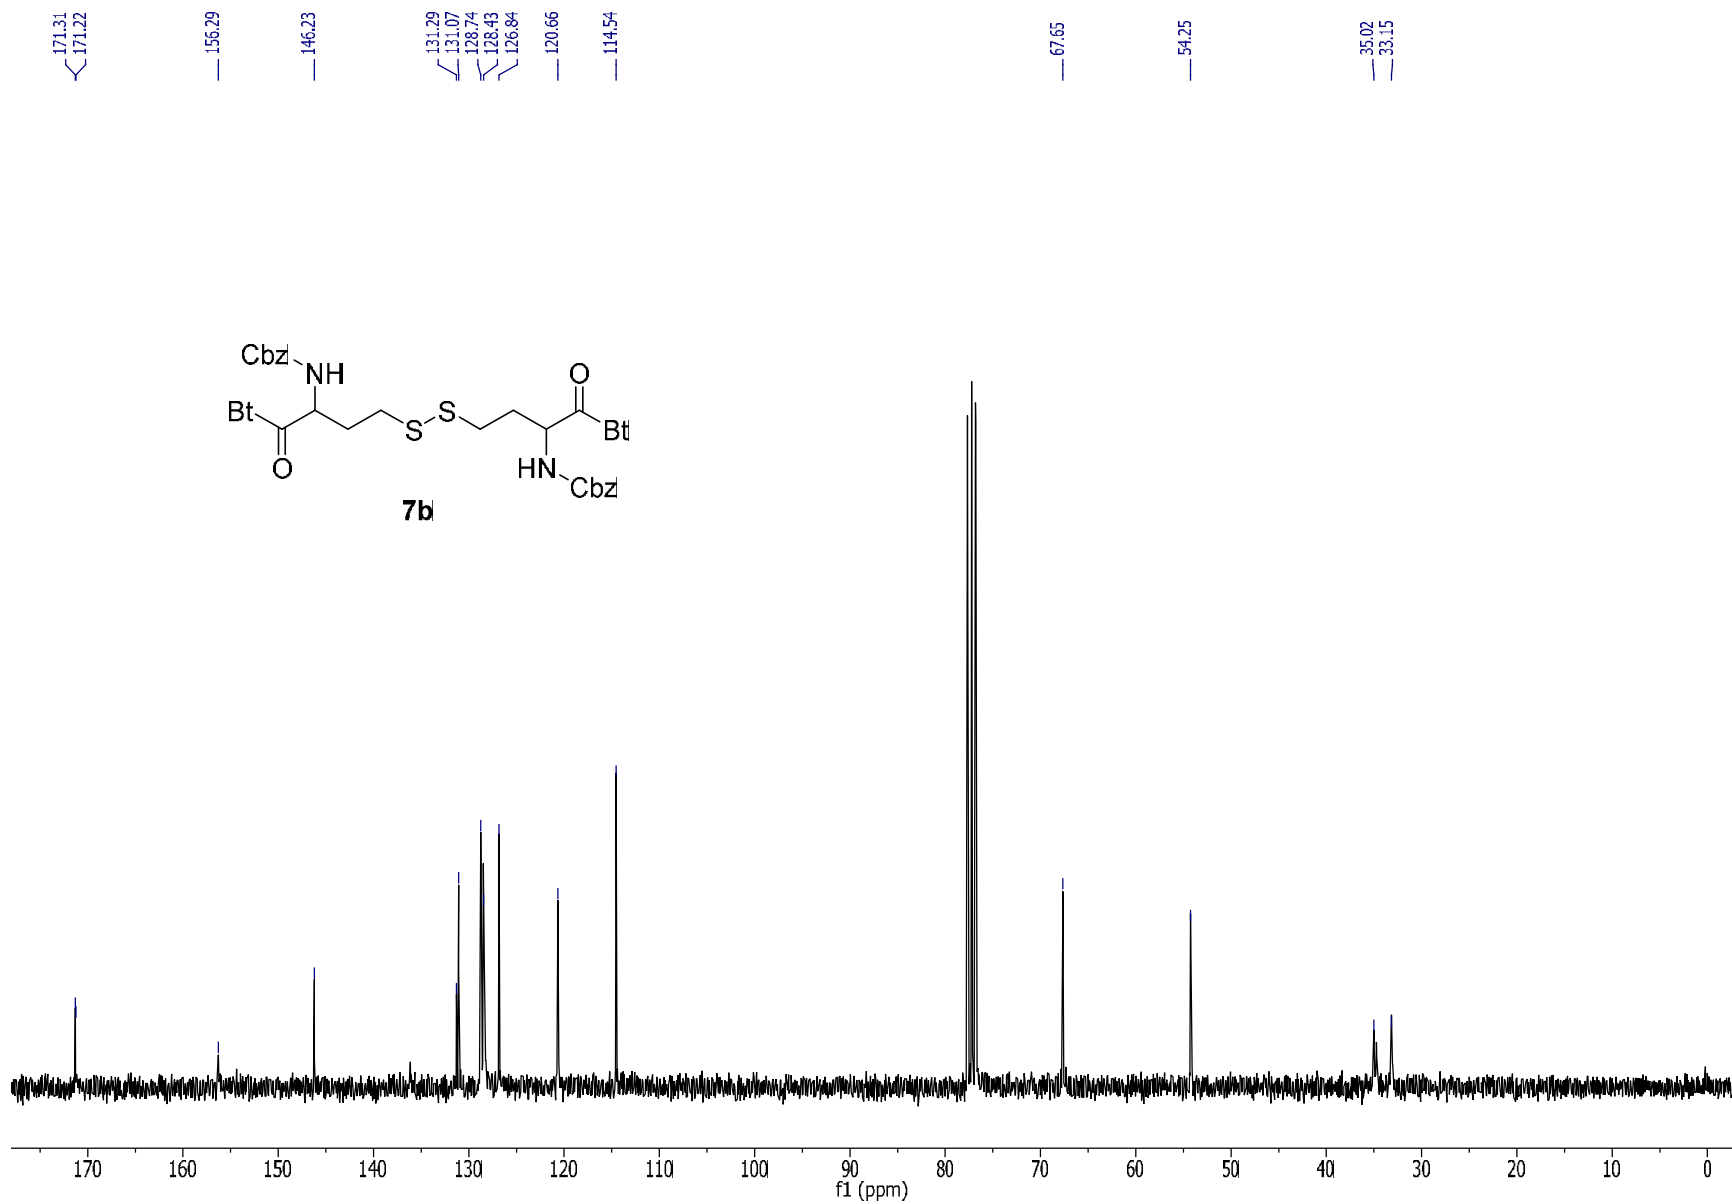

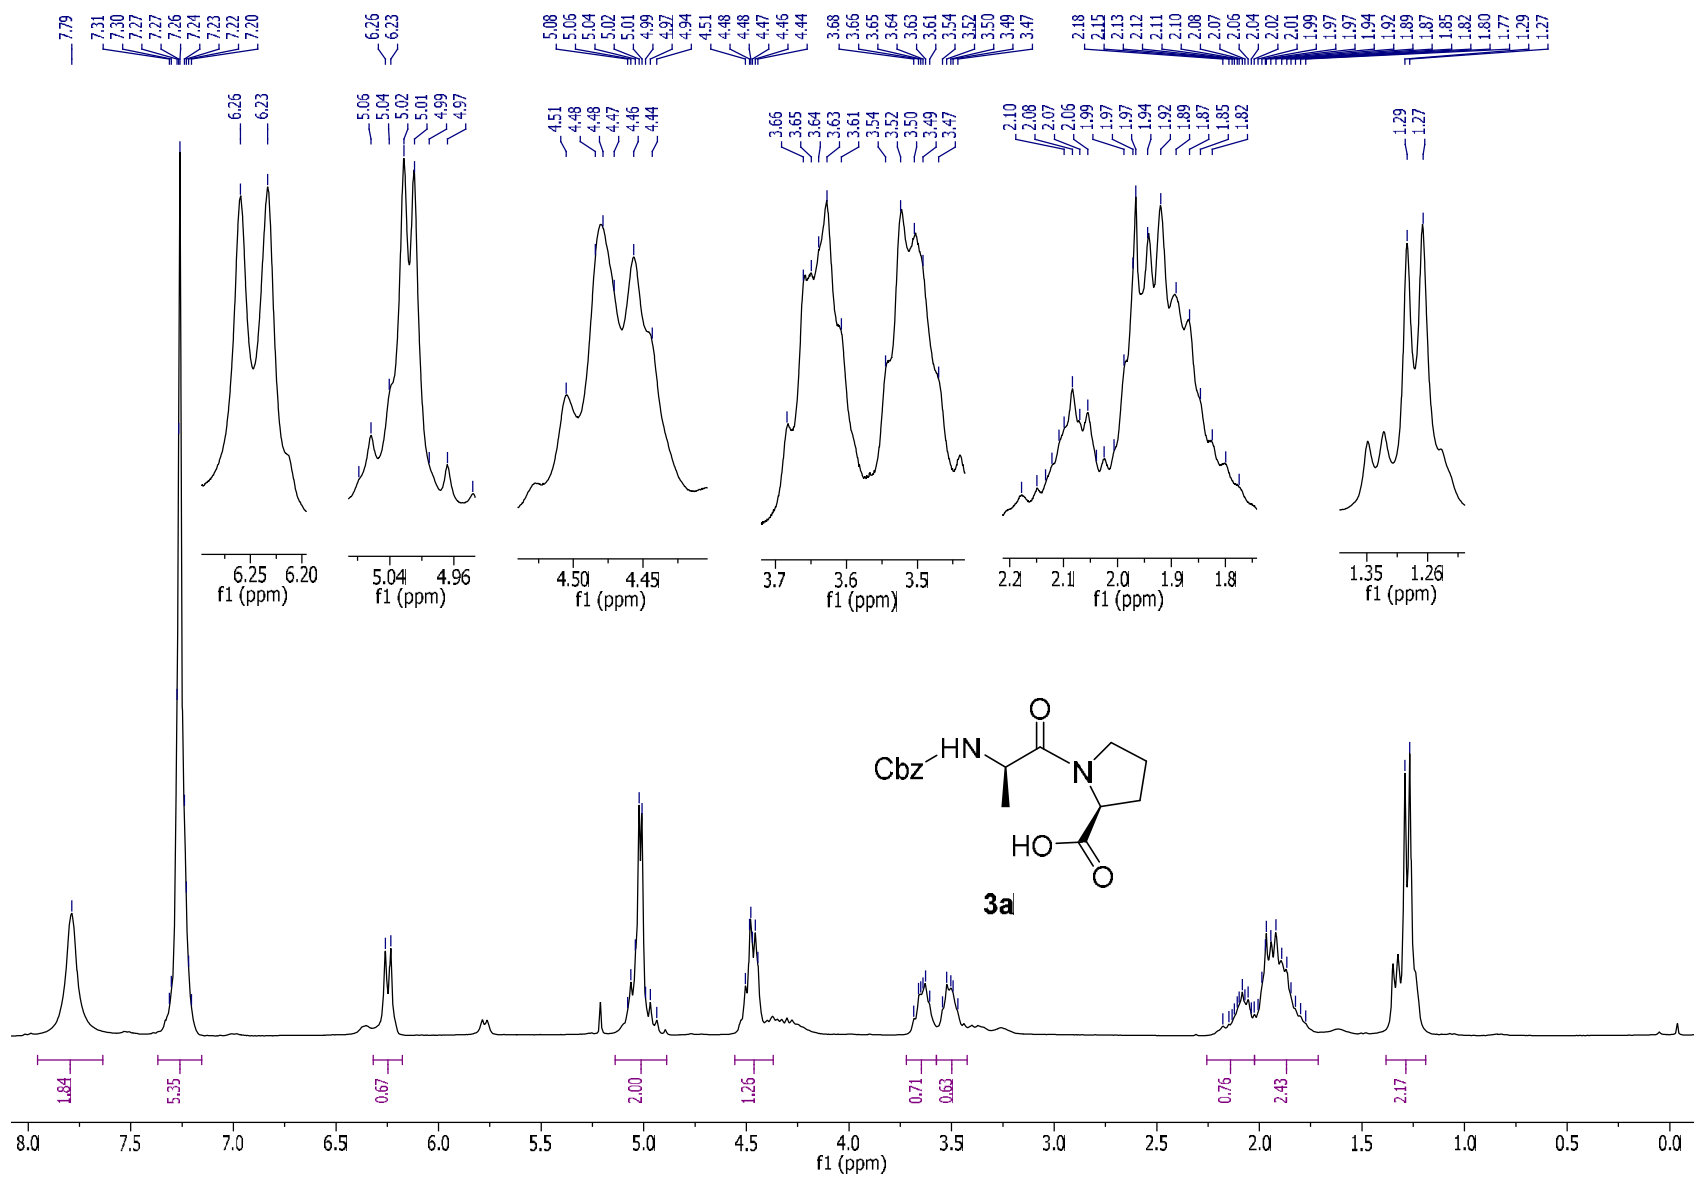

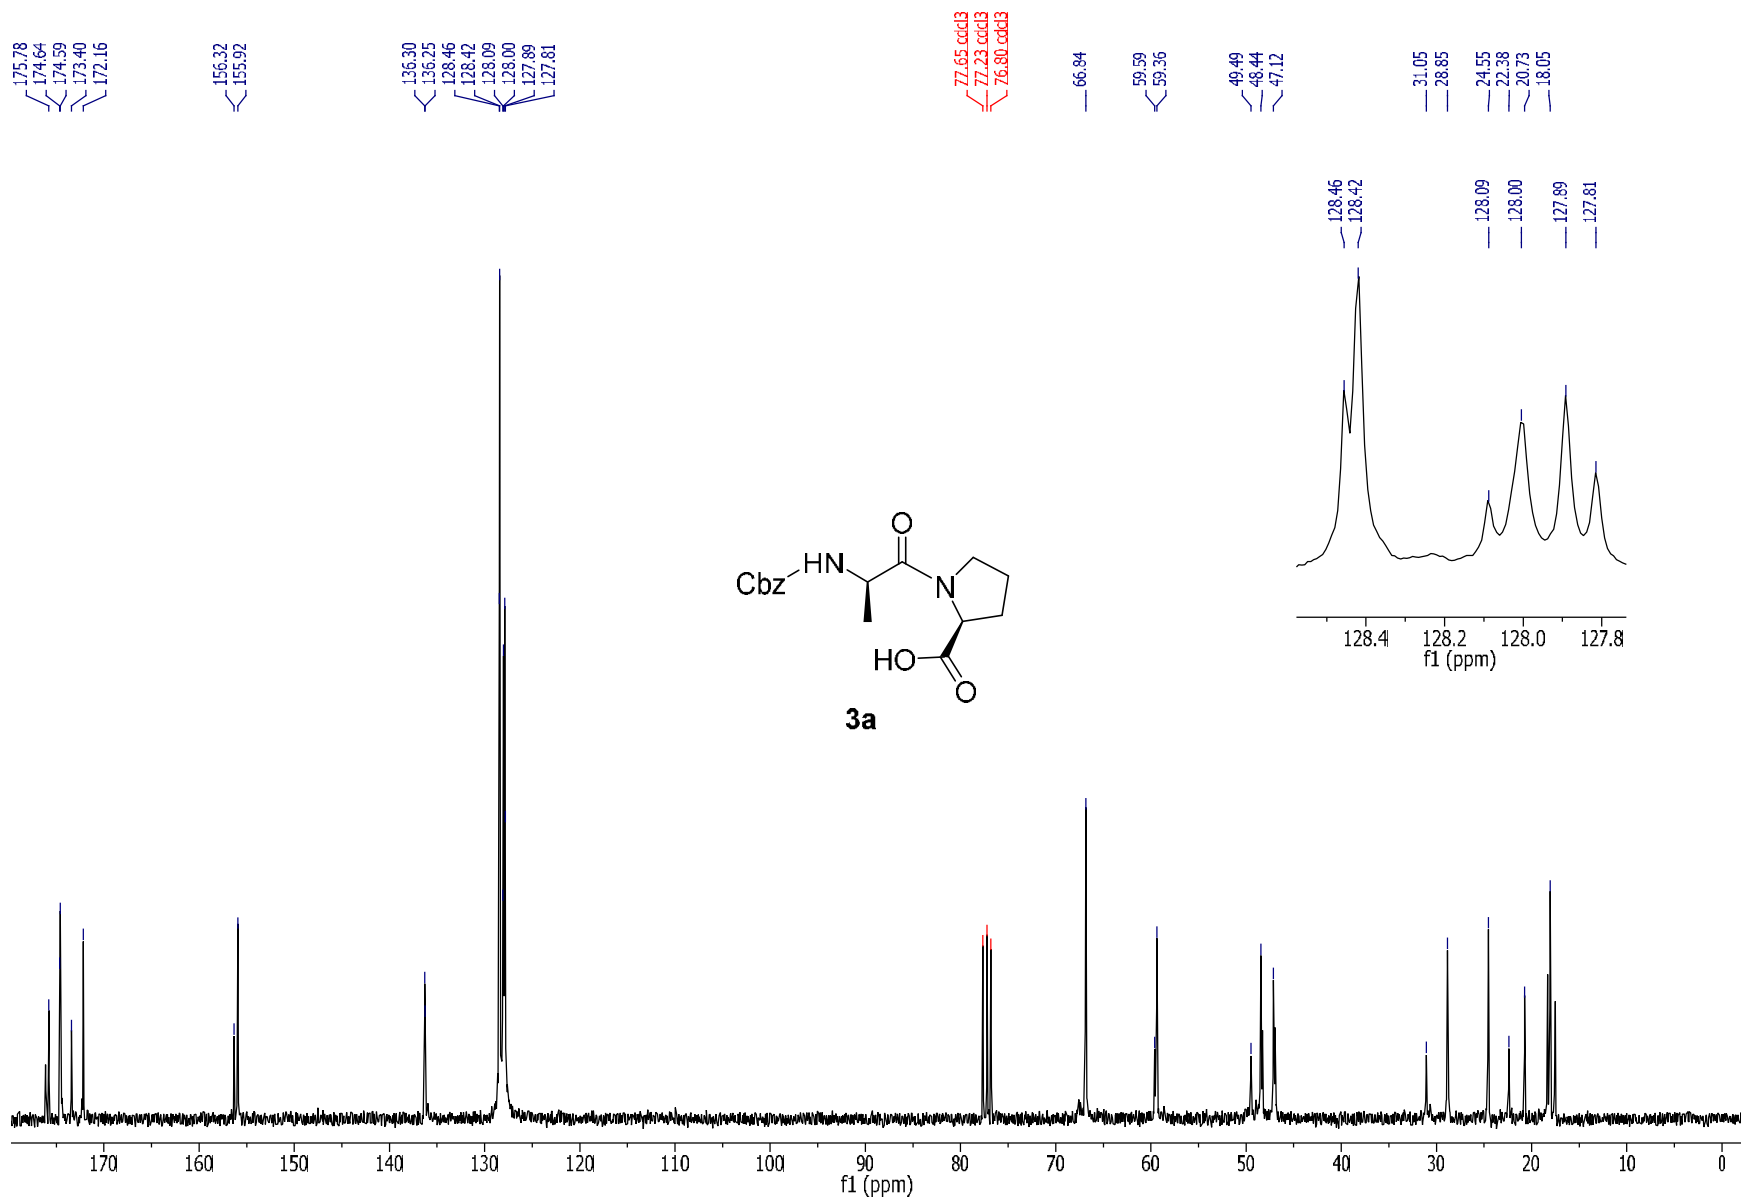



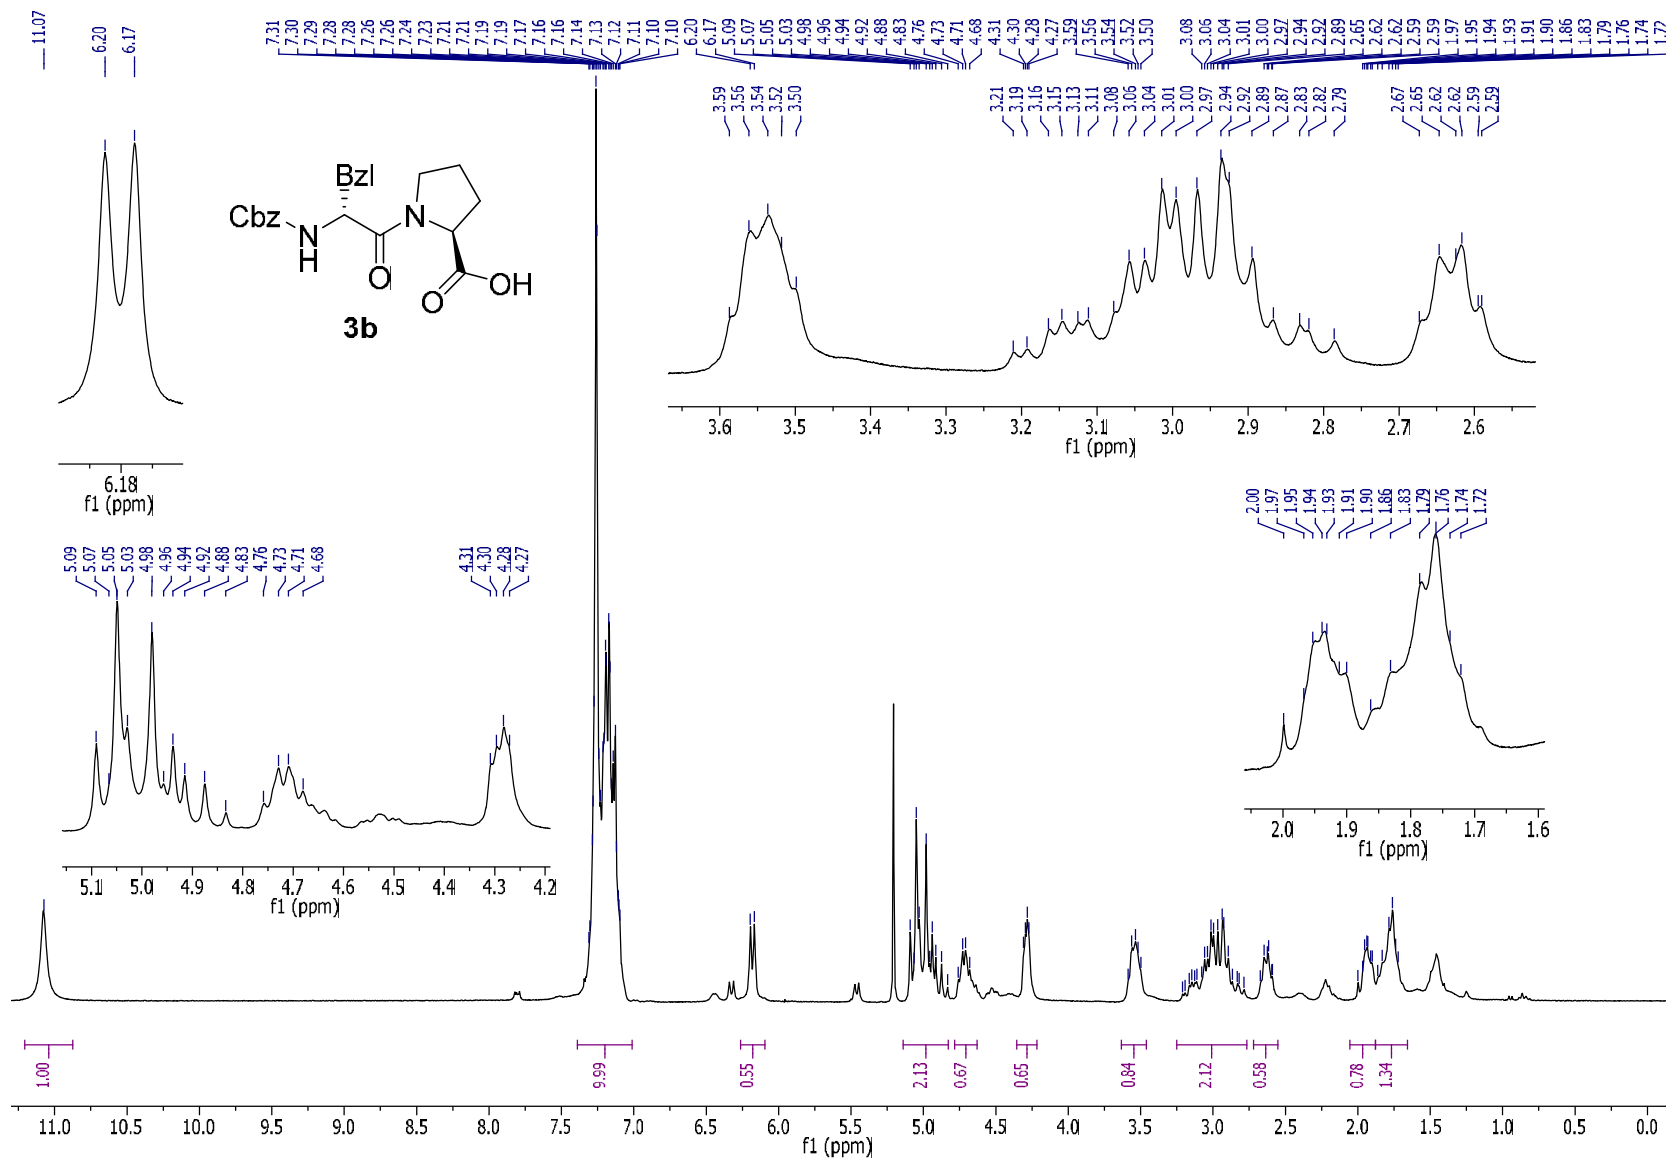

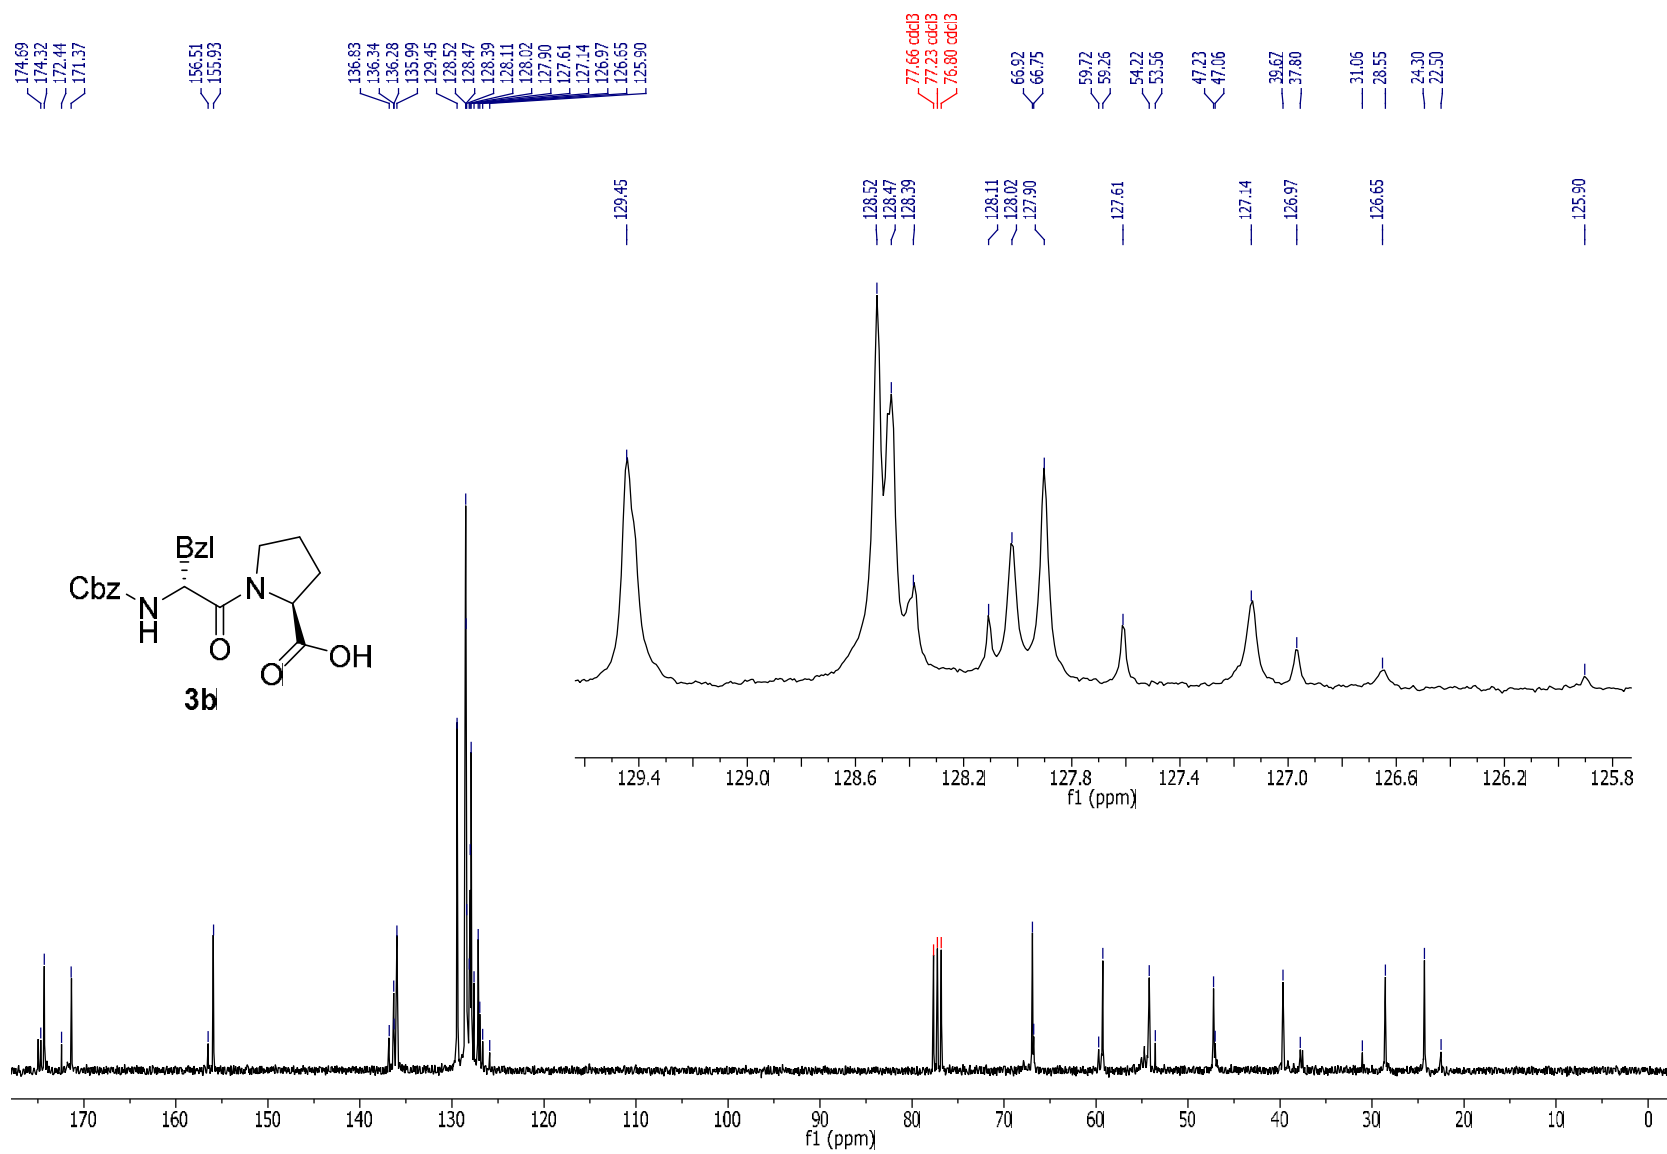

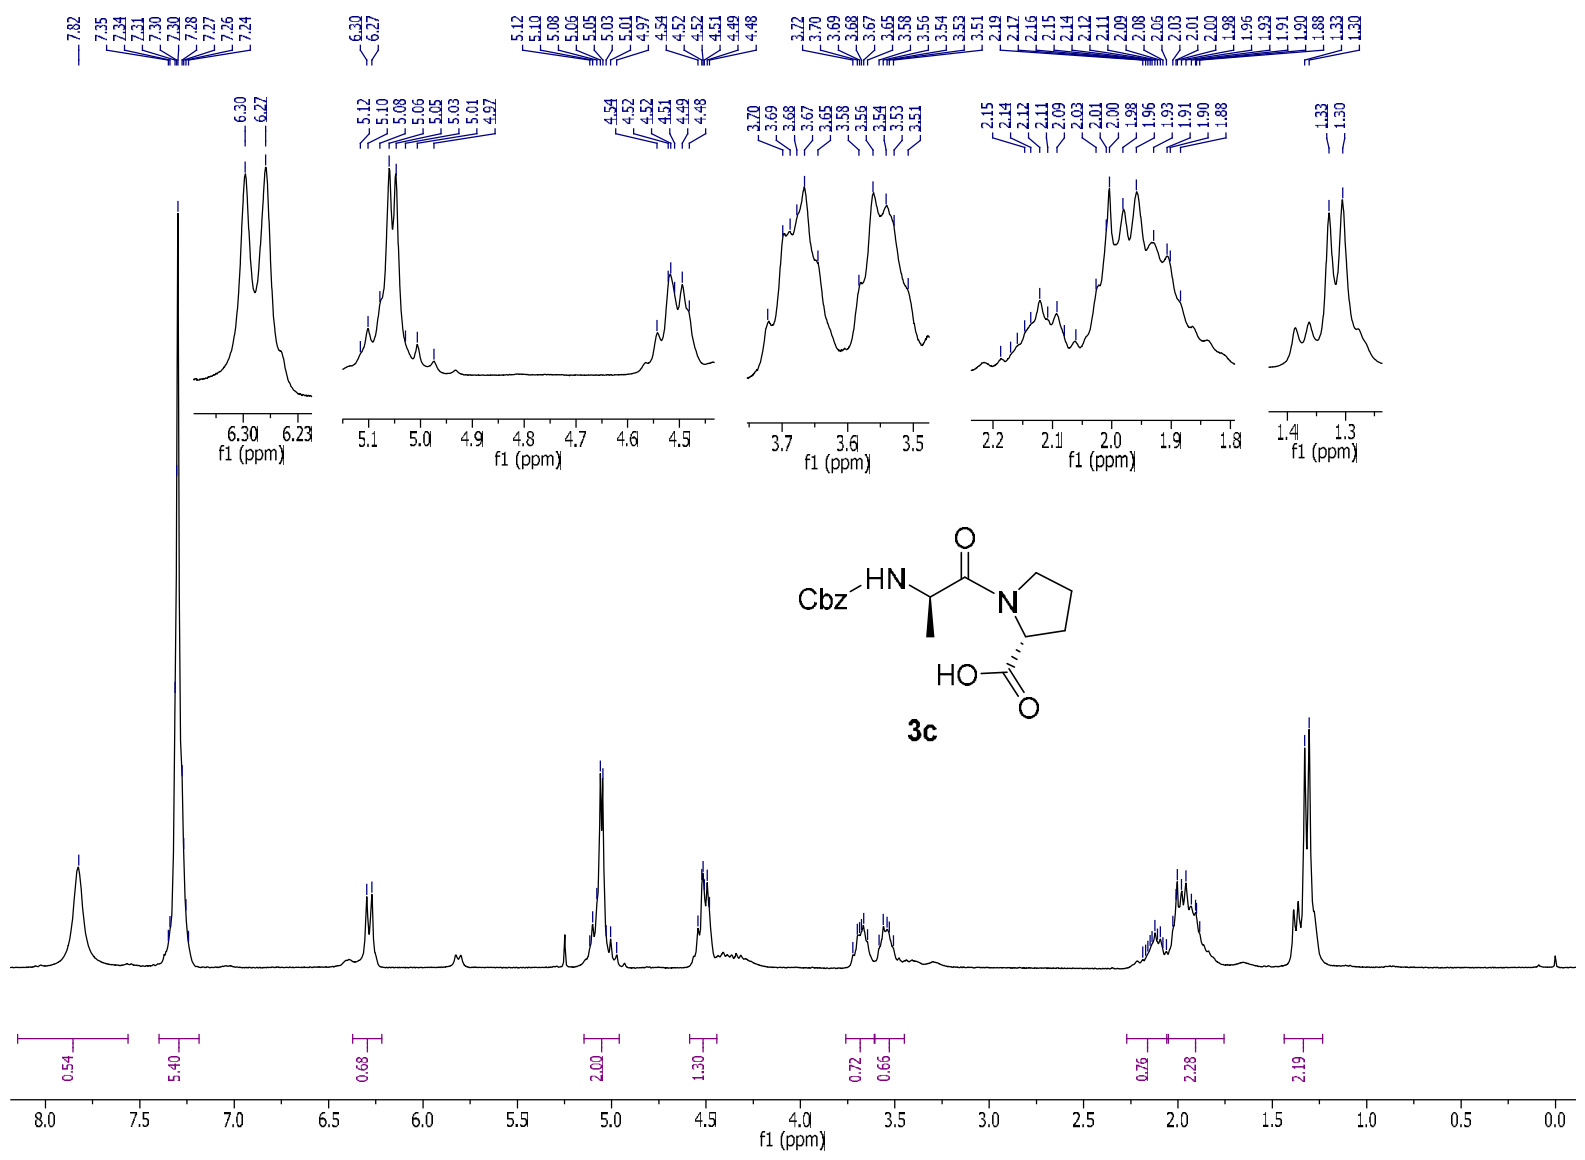

175.87  
174.45  
172.54

156.14  
155.93

136.35

128.45  
128.09  
128.04  
127.93

66.81

58.98

49.51  
48.32  
47.03

28.69  
24.73

18.31  
17.49

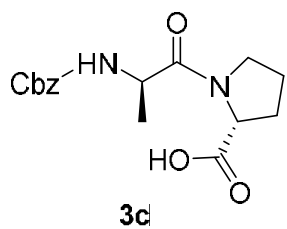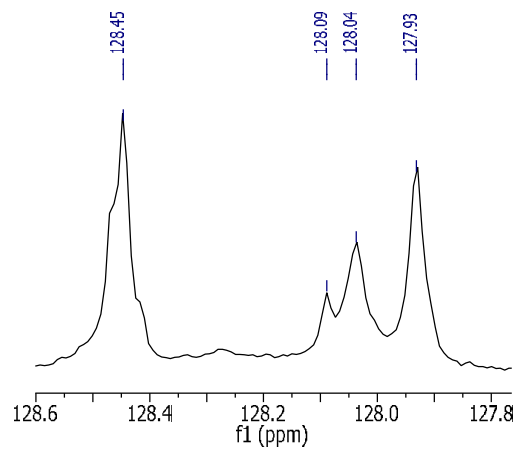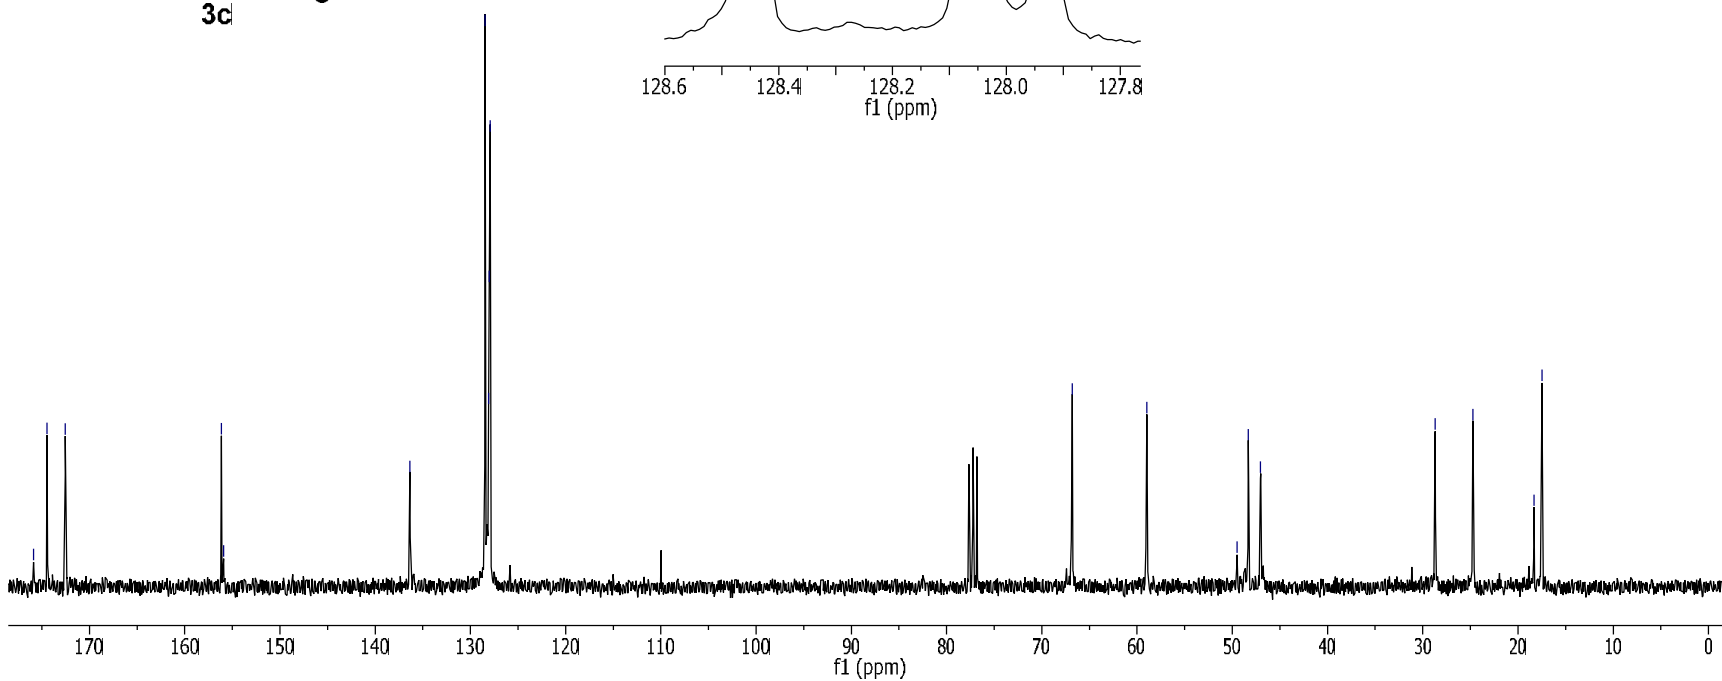

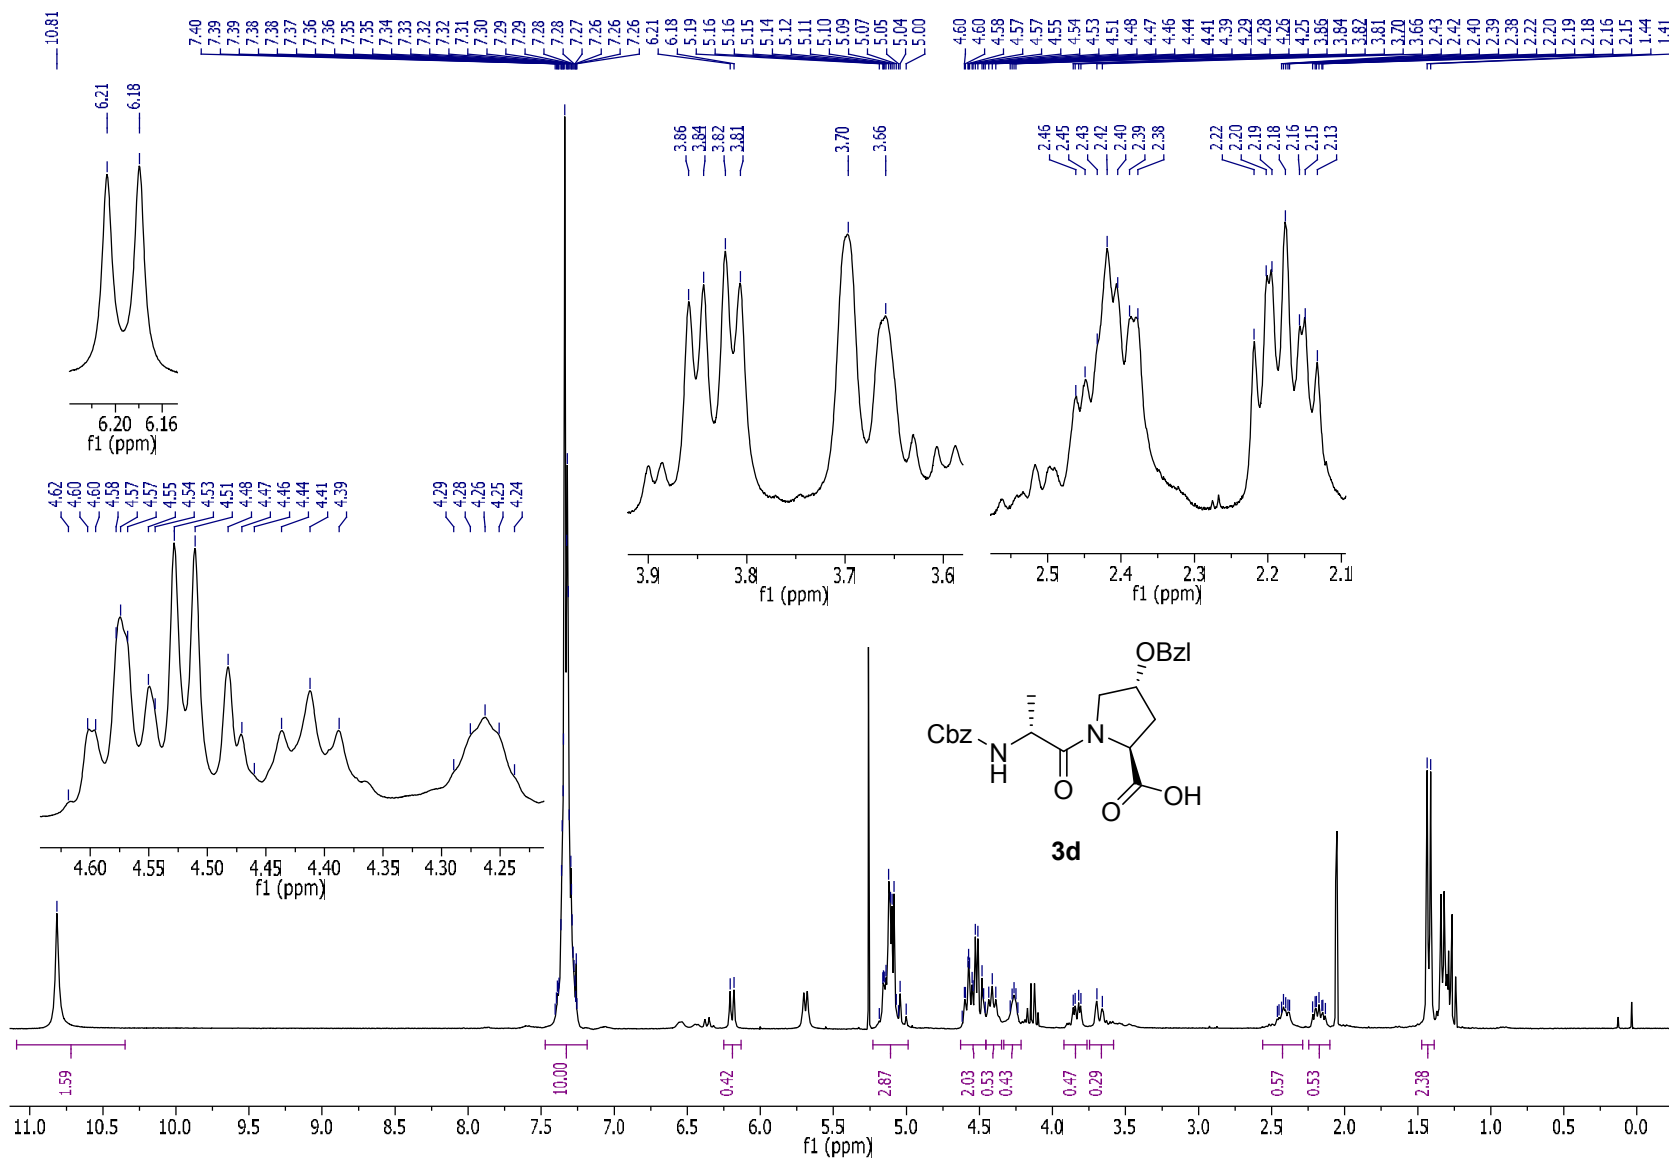

172.48  
171.61  
170.23  
155.99  
155.76  
146.13  
146.05  
137.53  
136.57  
131.24  
130.80  
130.68  
128.74  
128.59  
128.30  
128.16  
128.07  
127.71  
126.59  
126.55

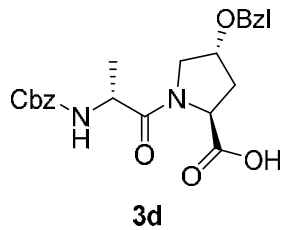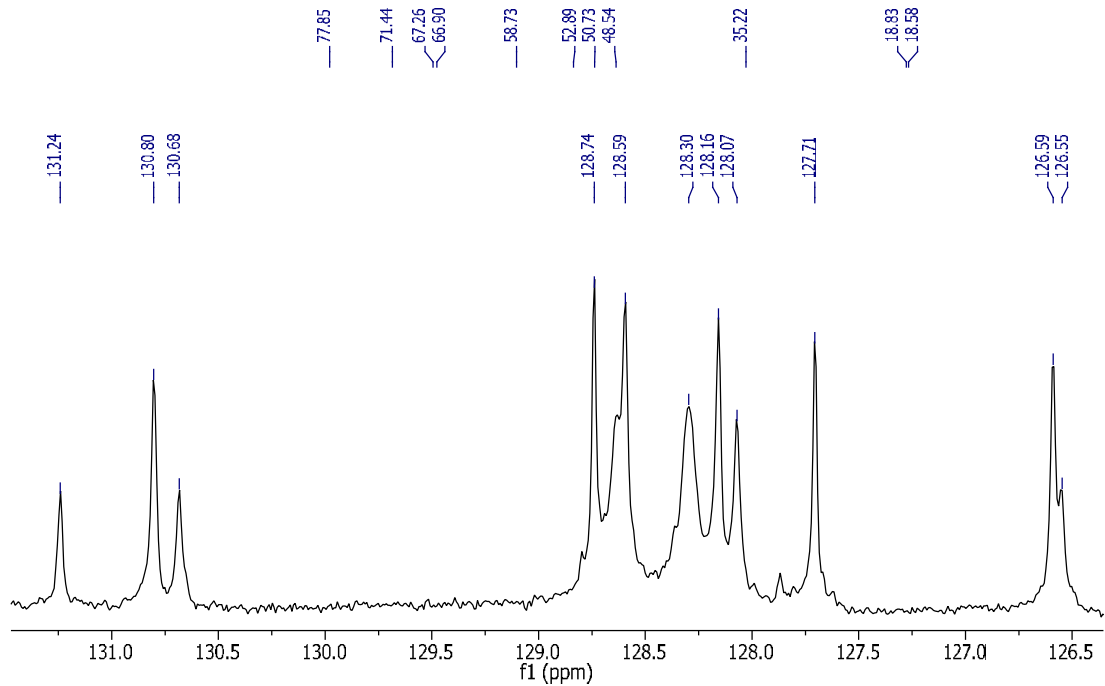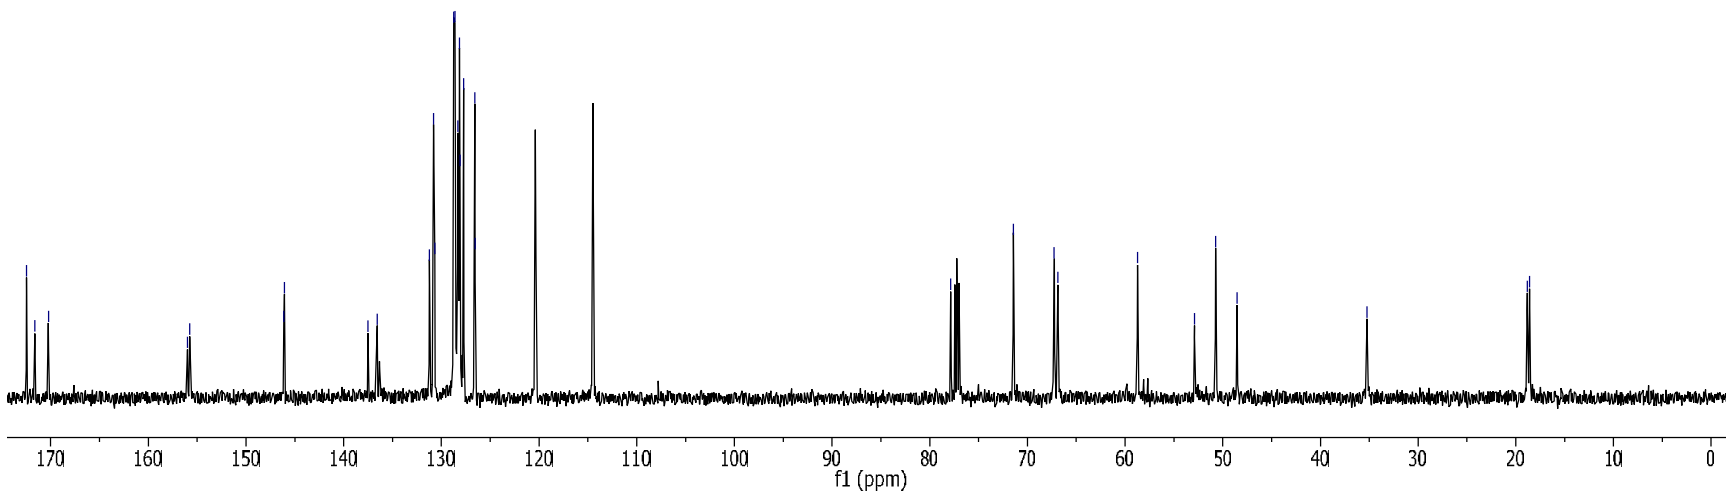

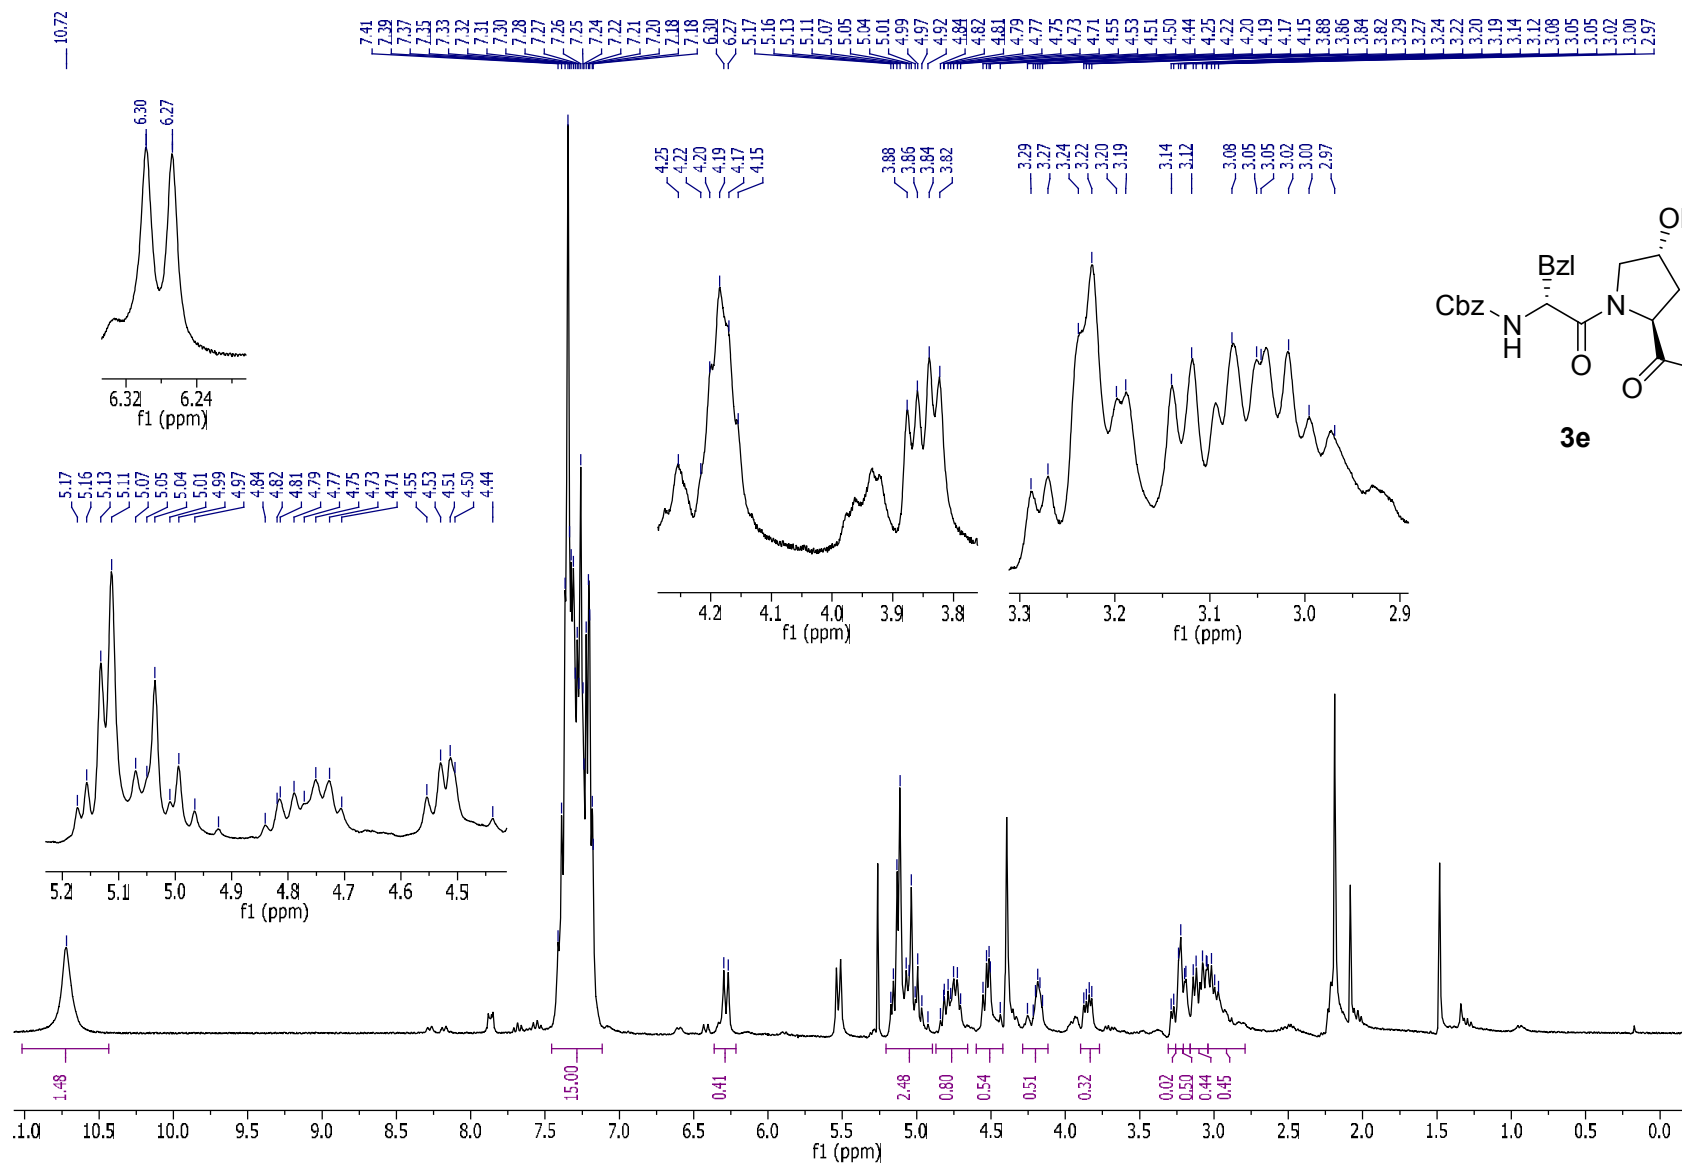

173.18  
172.03  
167.71  
164.63

152.14

137.55  
135.87  
134.91  
134.84  
130.07  
129.50  
129.12  
128.86  
128.84  
128.76  
128.69  
128.66  
128.63  
128.53  
128.26  
128.15  
128.11  
127.87  
127.74  
127.38

77.65 cdcl3  
77.23 cdcl3  
76.81 cdcl3

76.19  
74.48  
71.60  
70.77  
69.47  
67.14  
62.71

57.56  
54.21  
51.72

39.06  
38.56  
35.52  
33.92  
29.88  
28.27

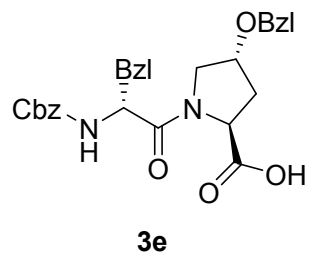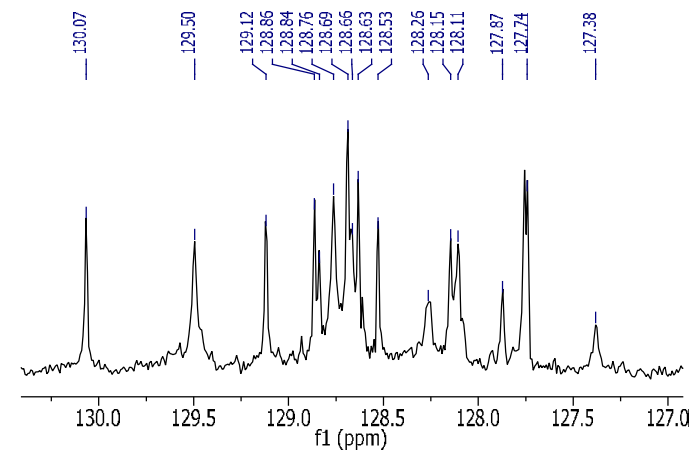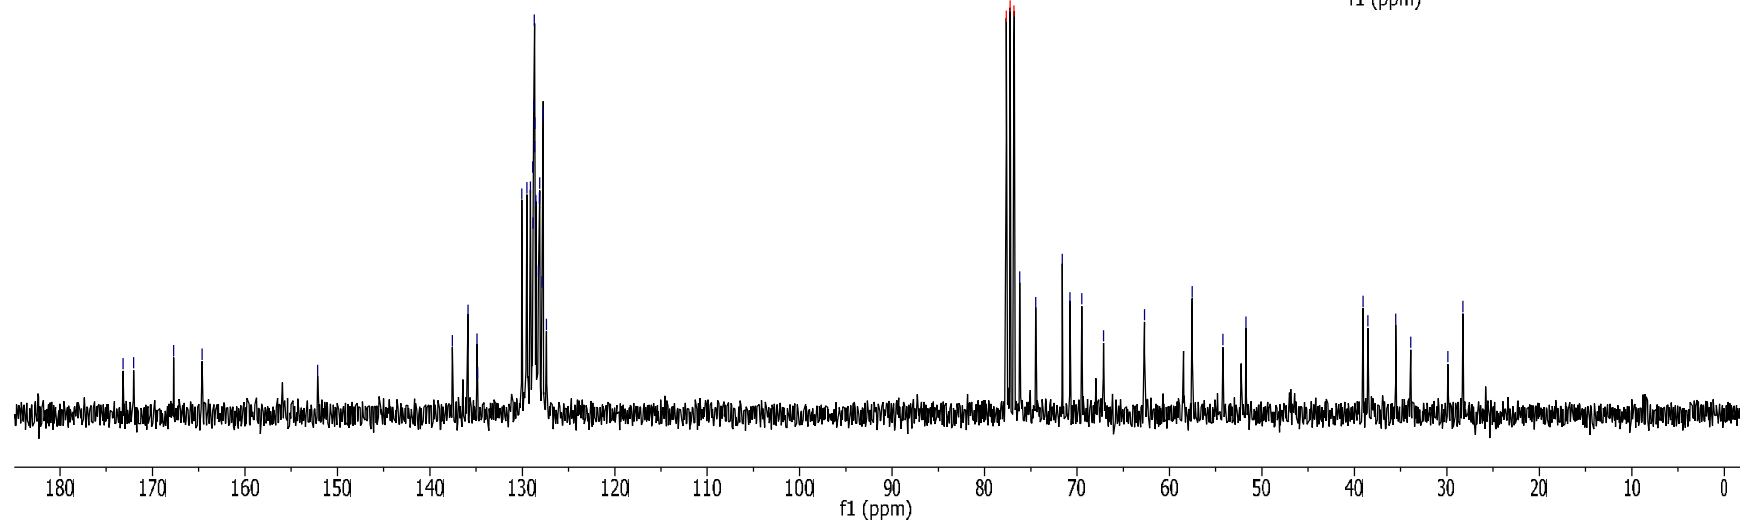



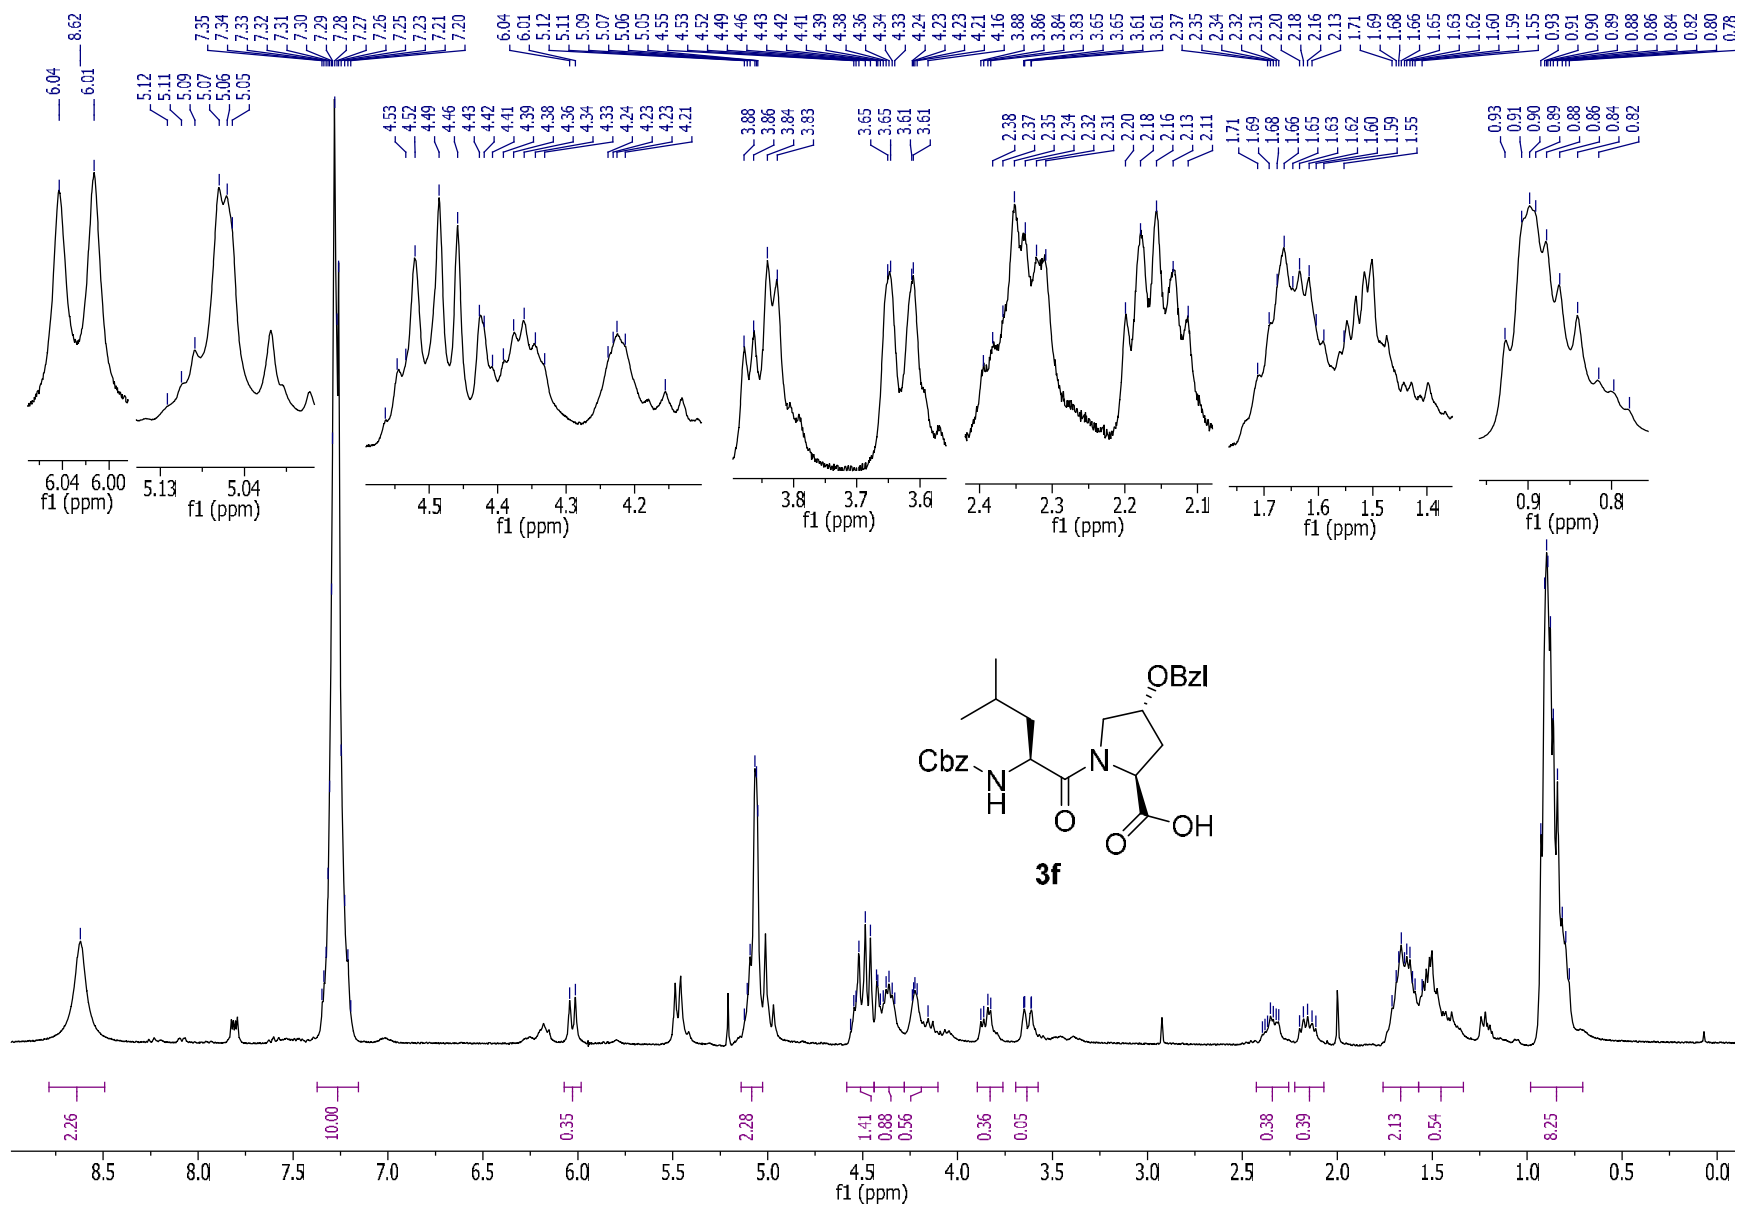

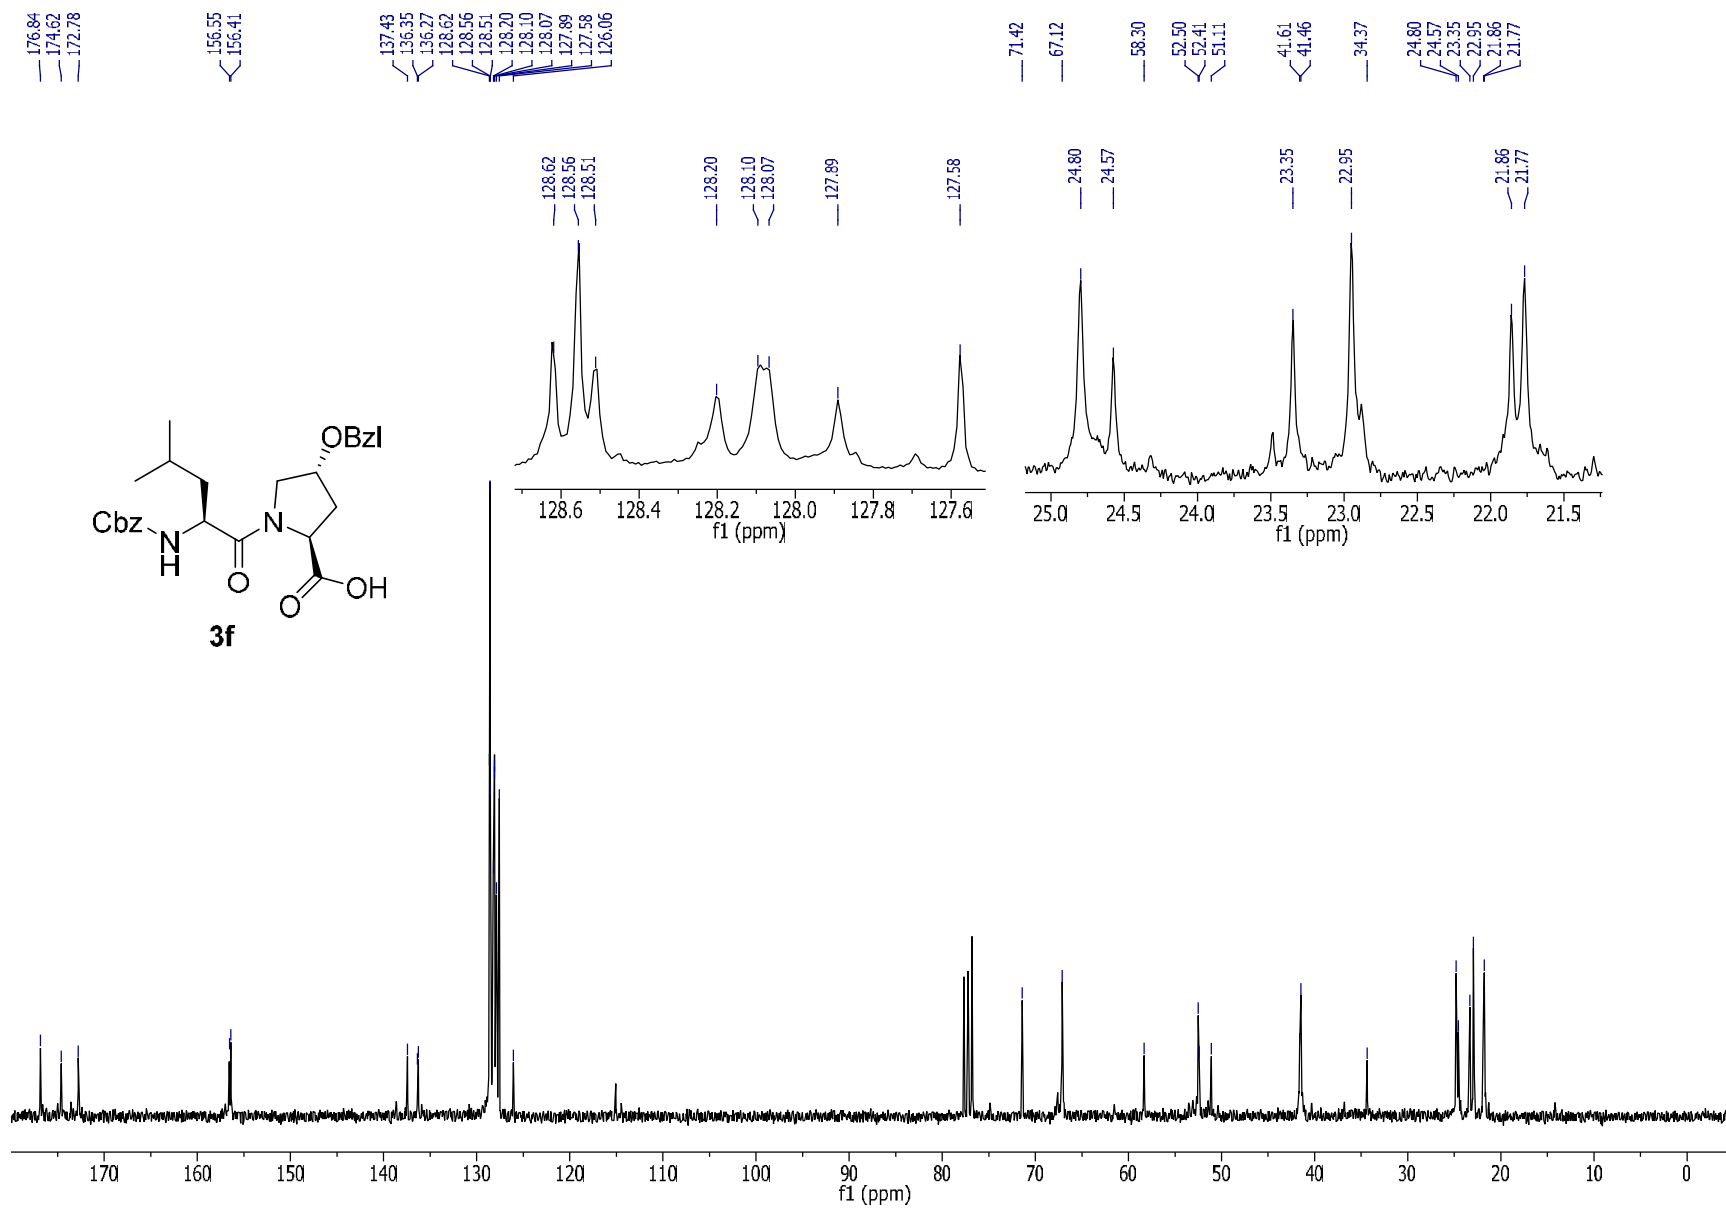

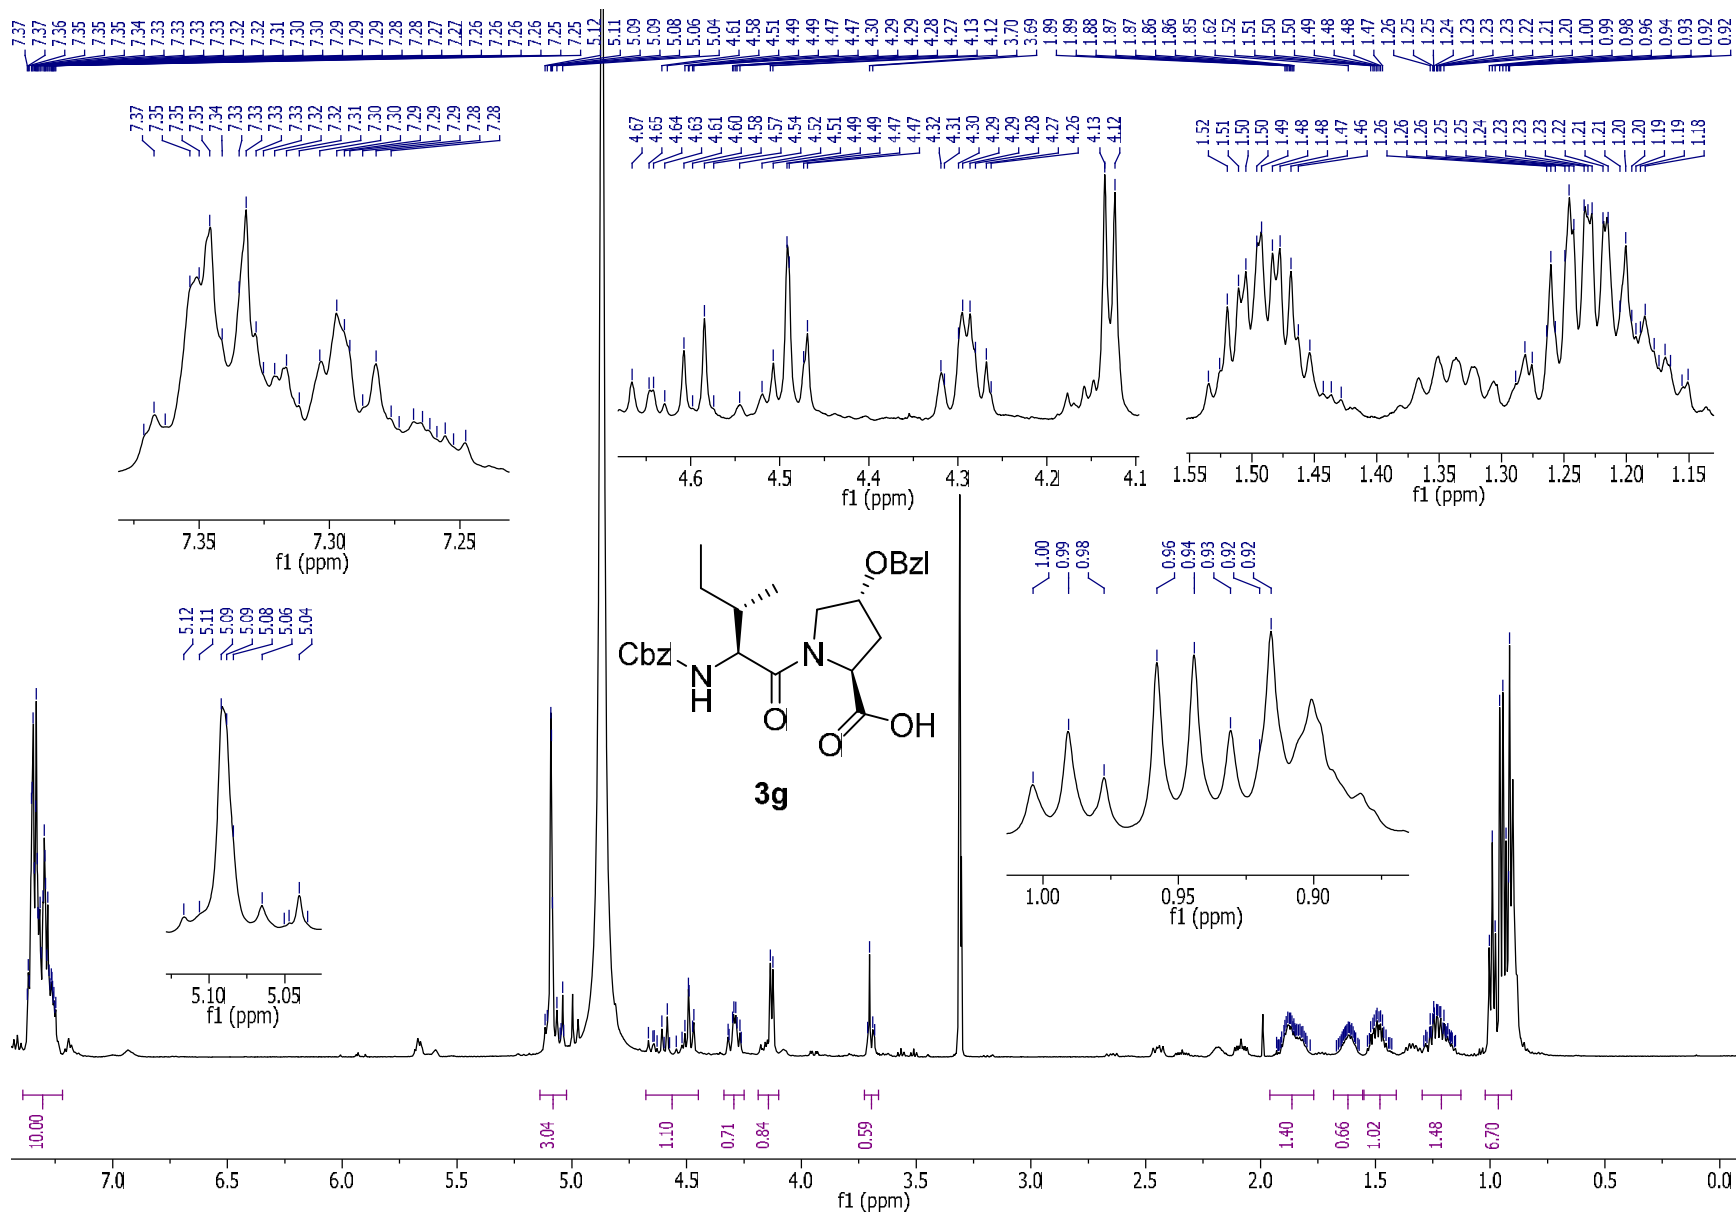

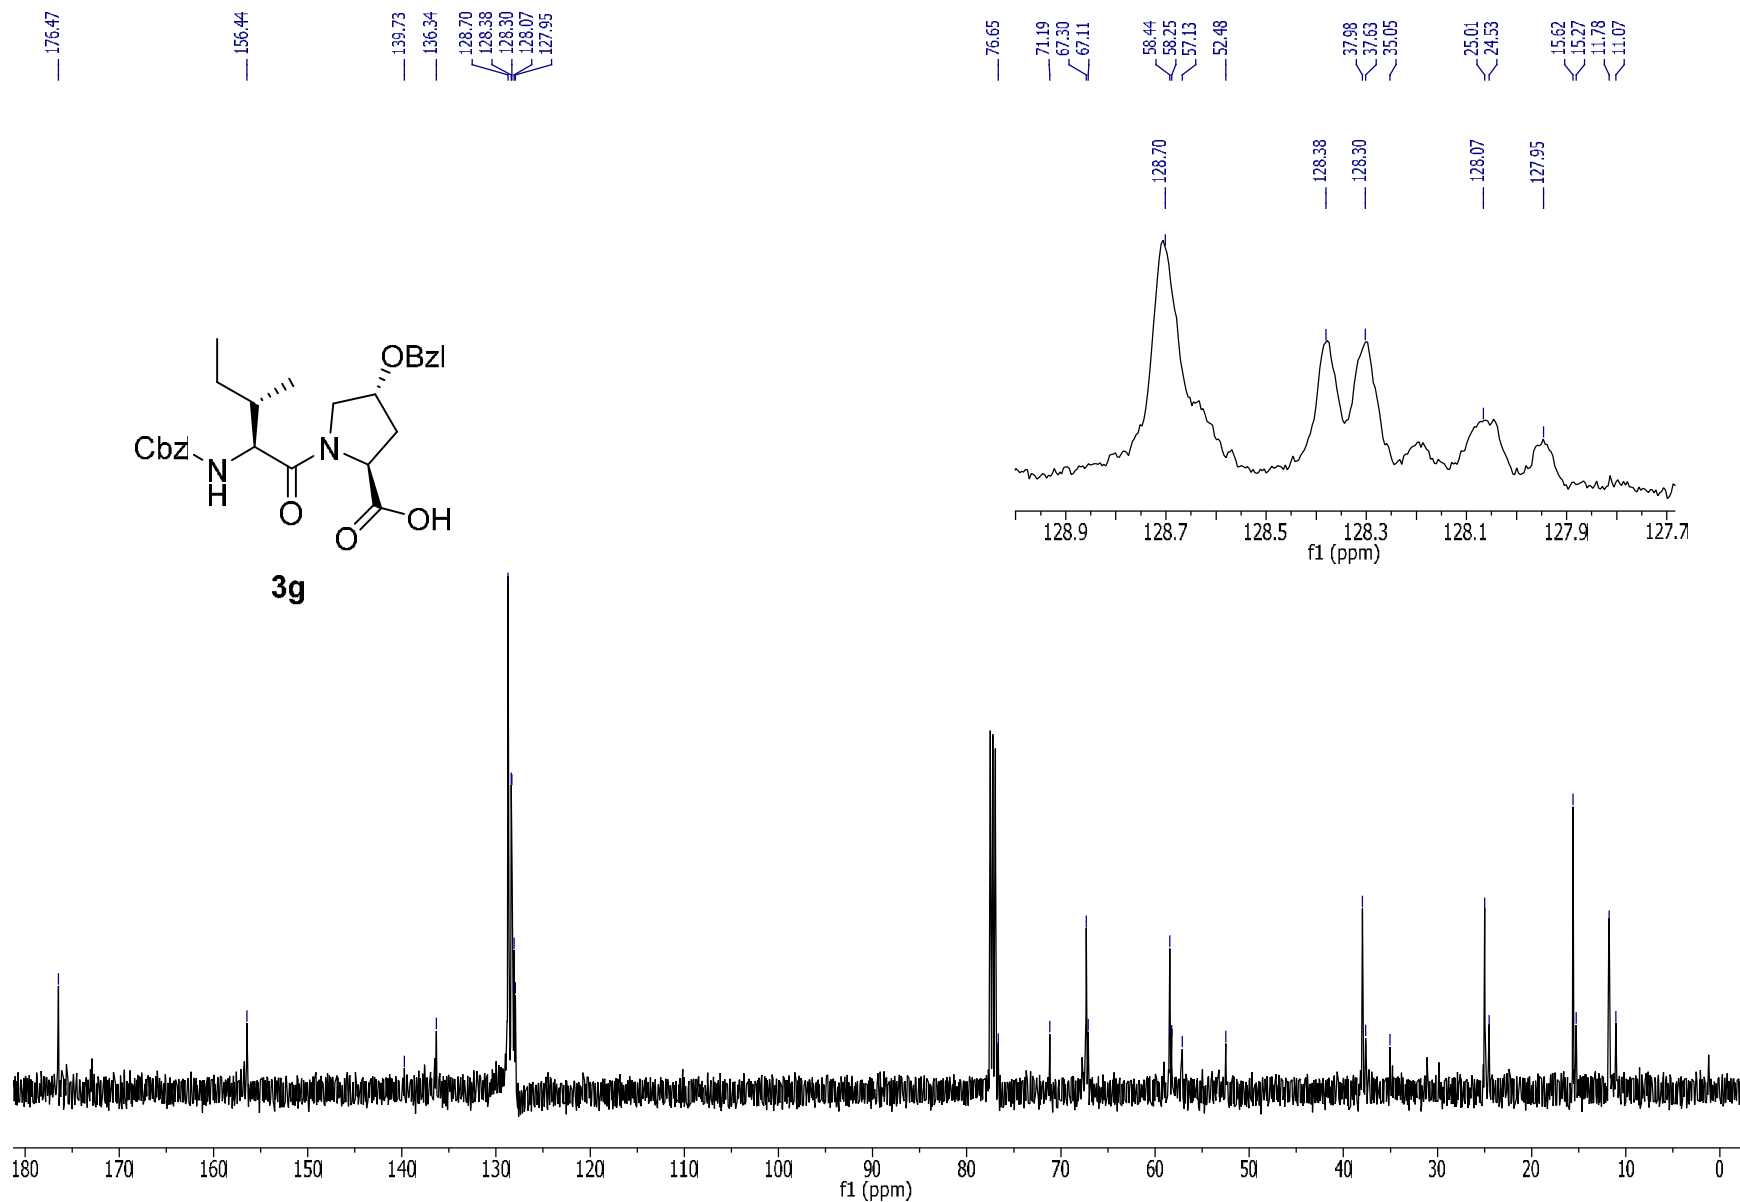

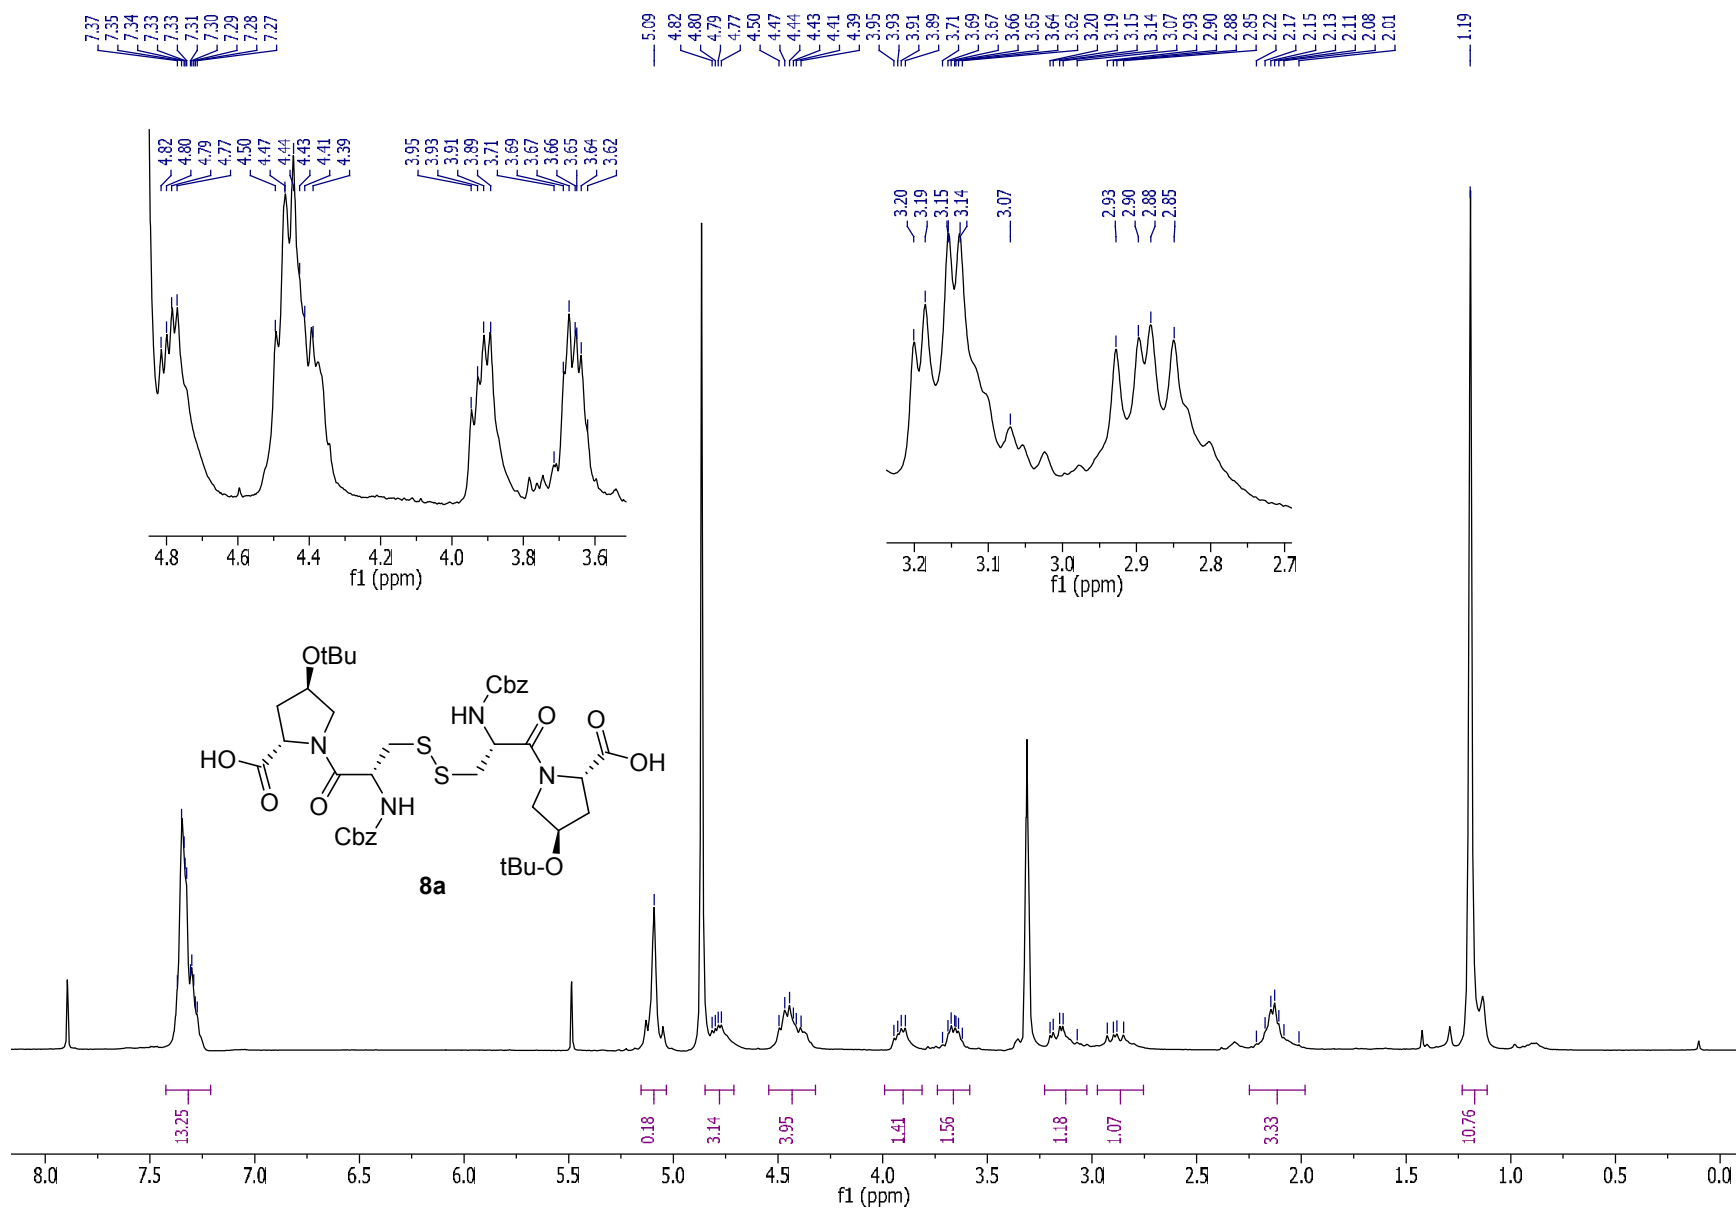

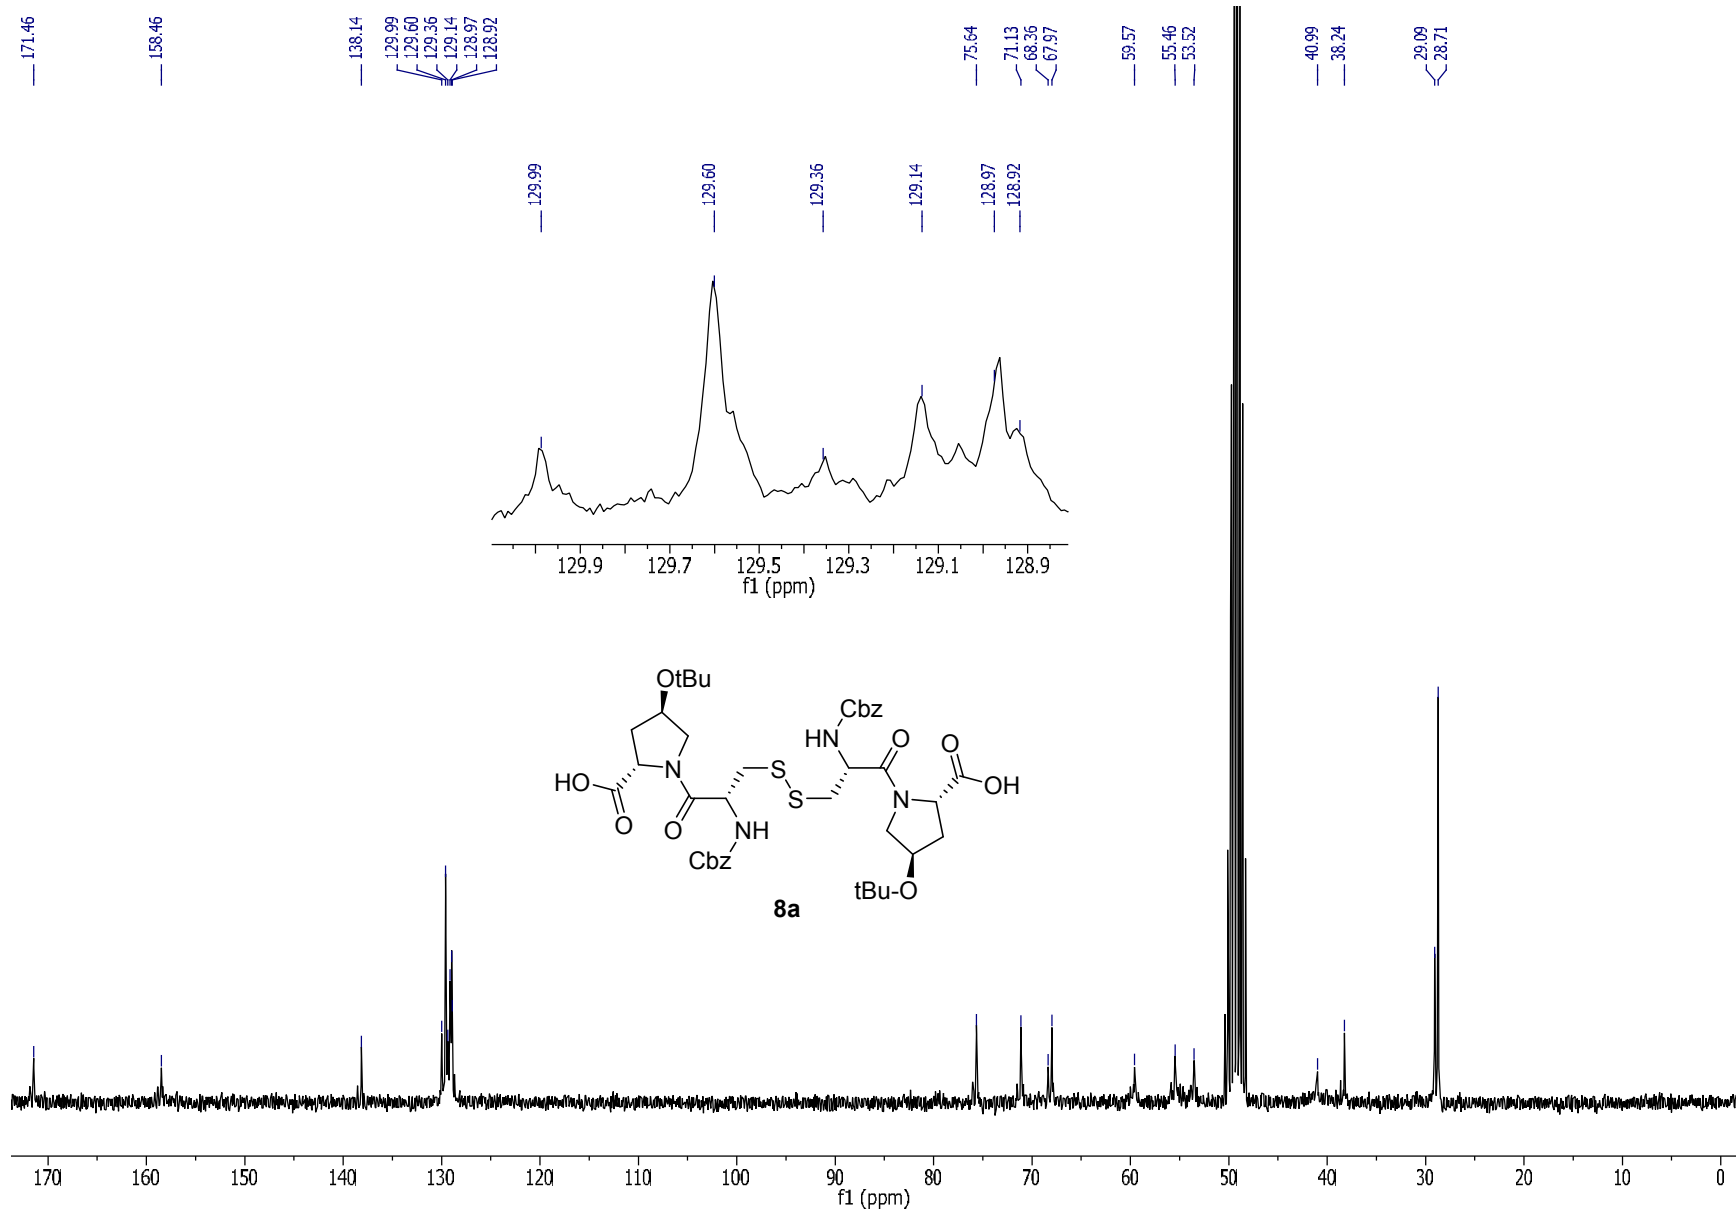

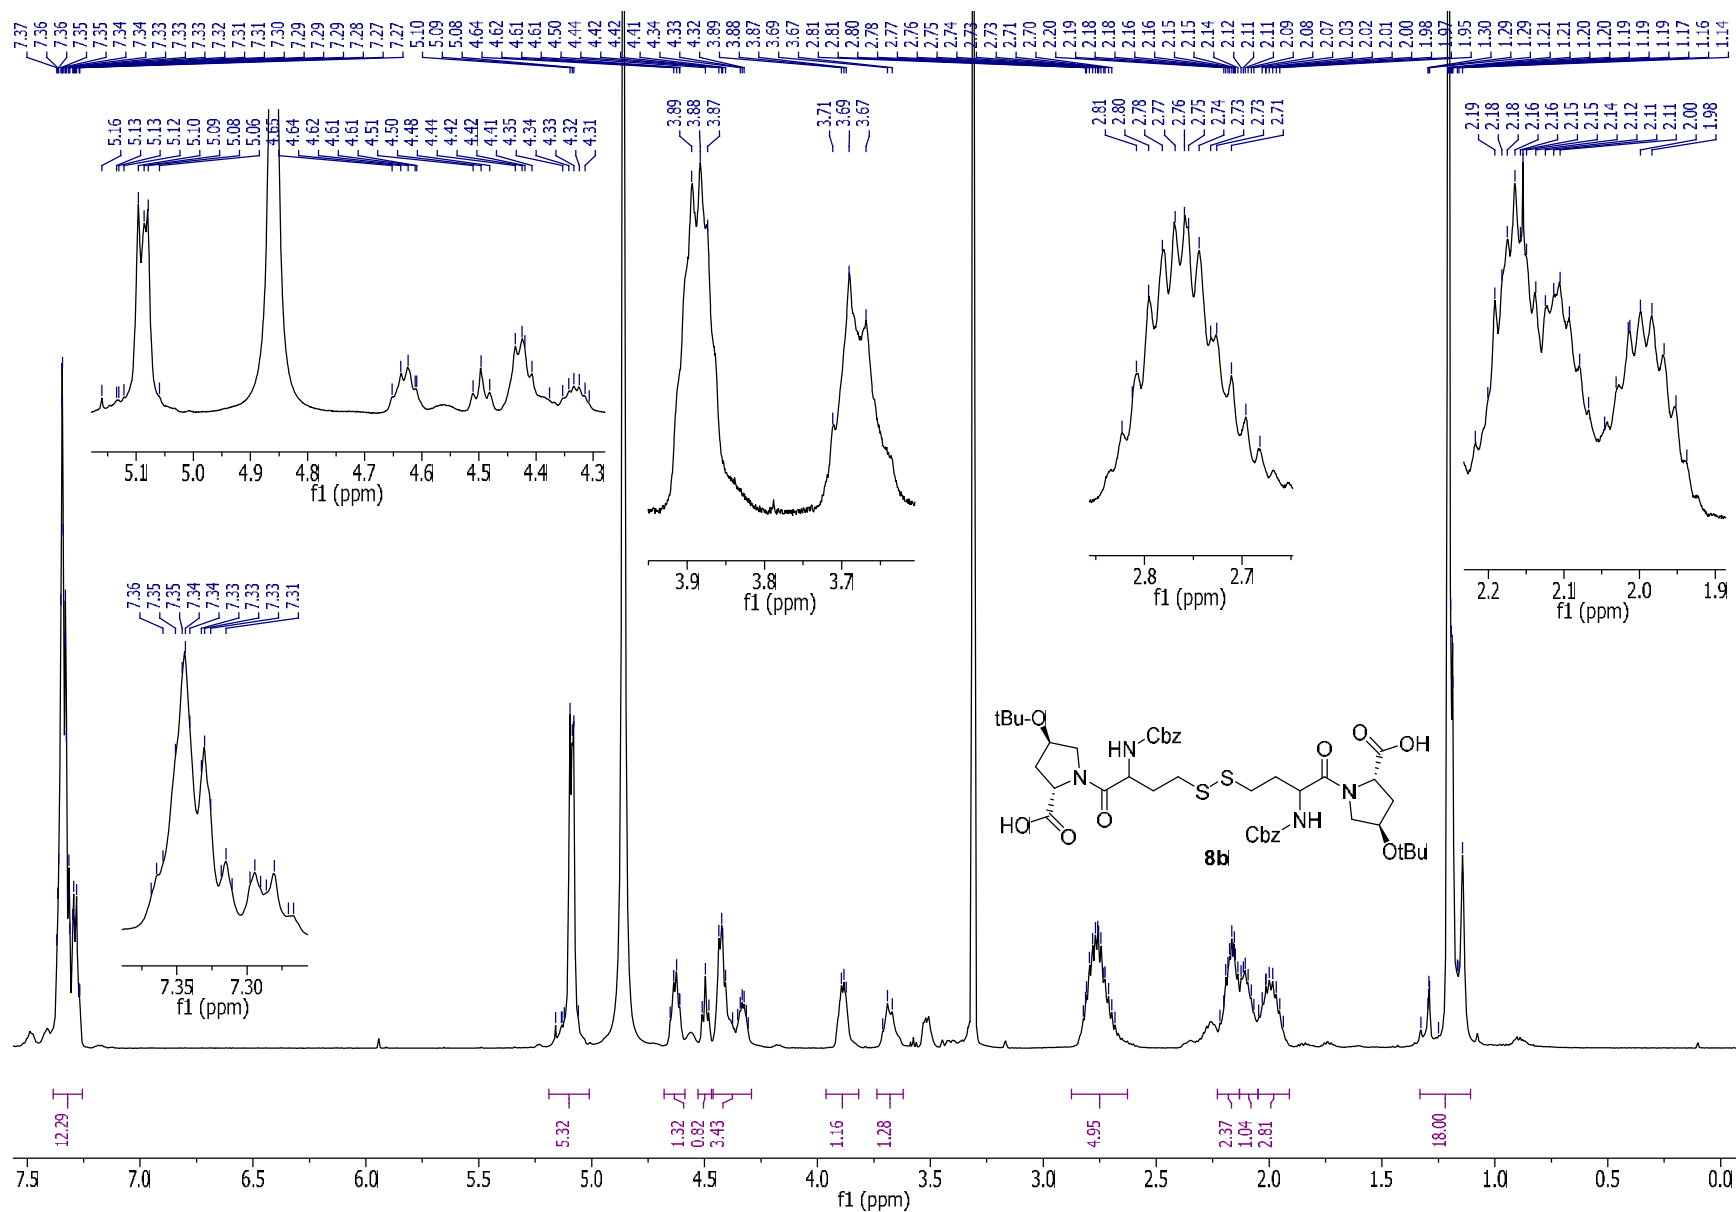

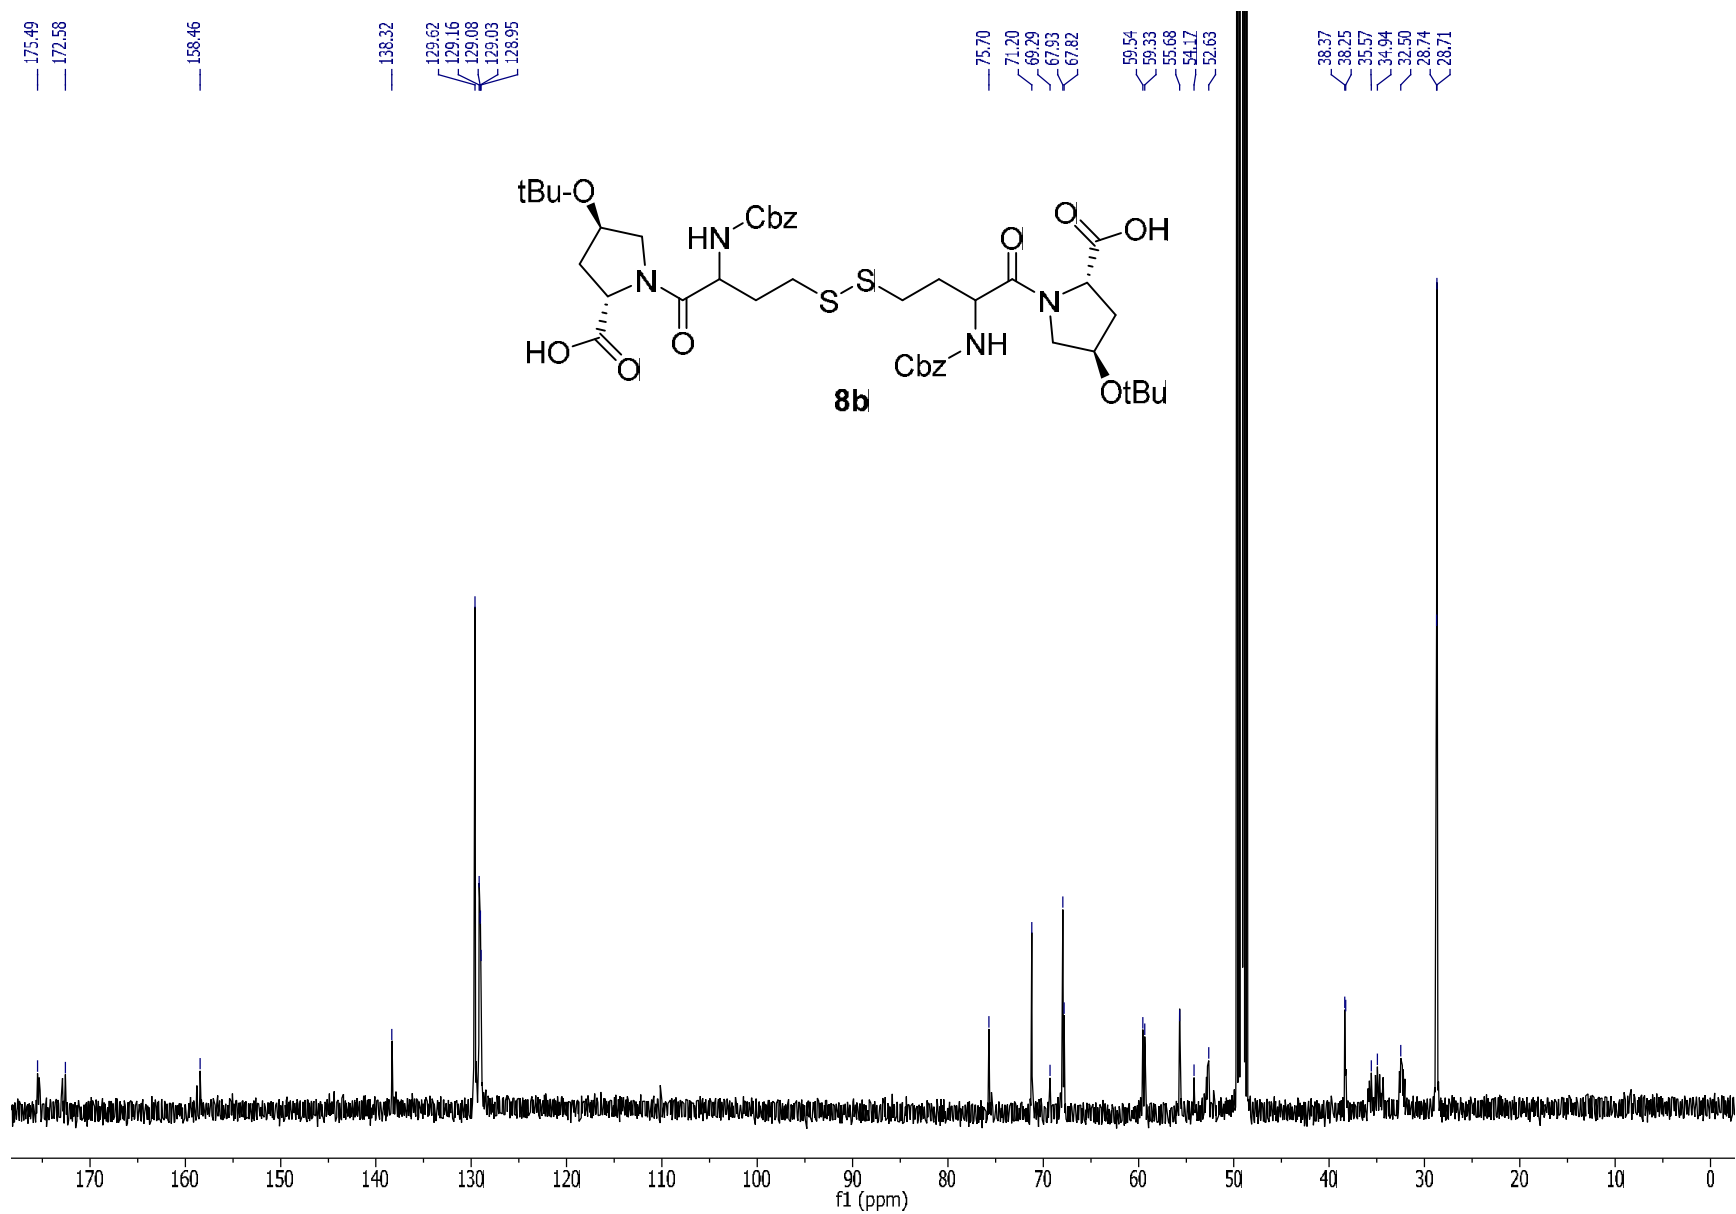



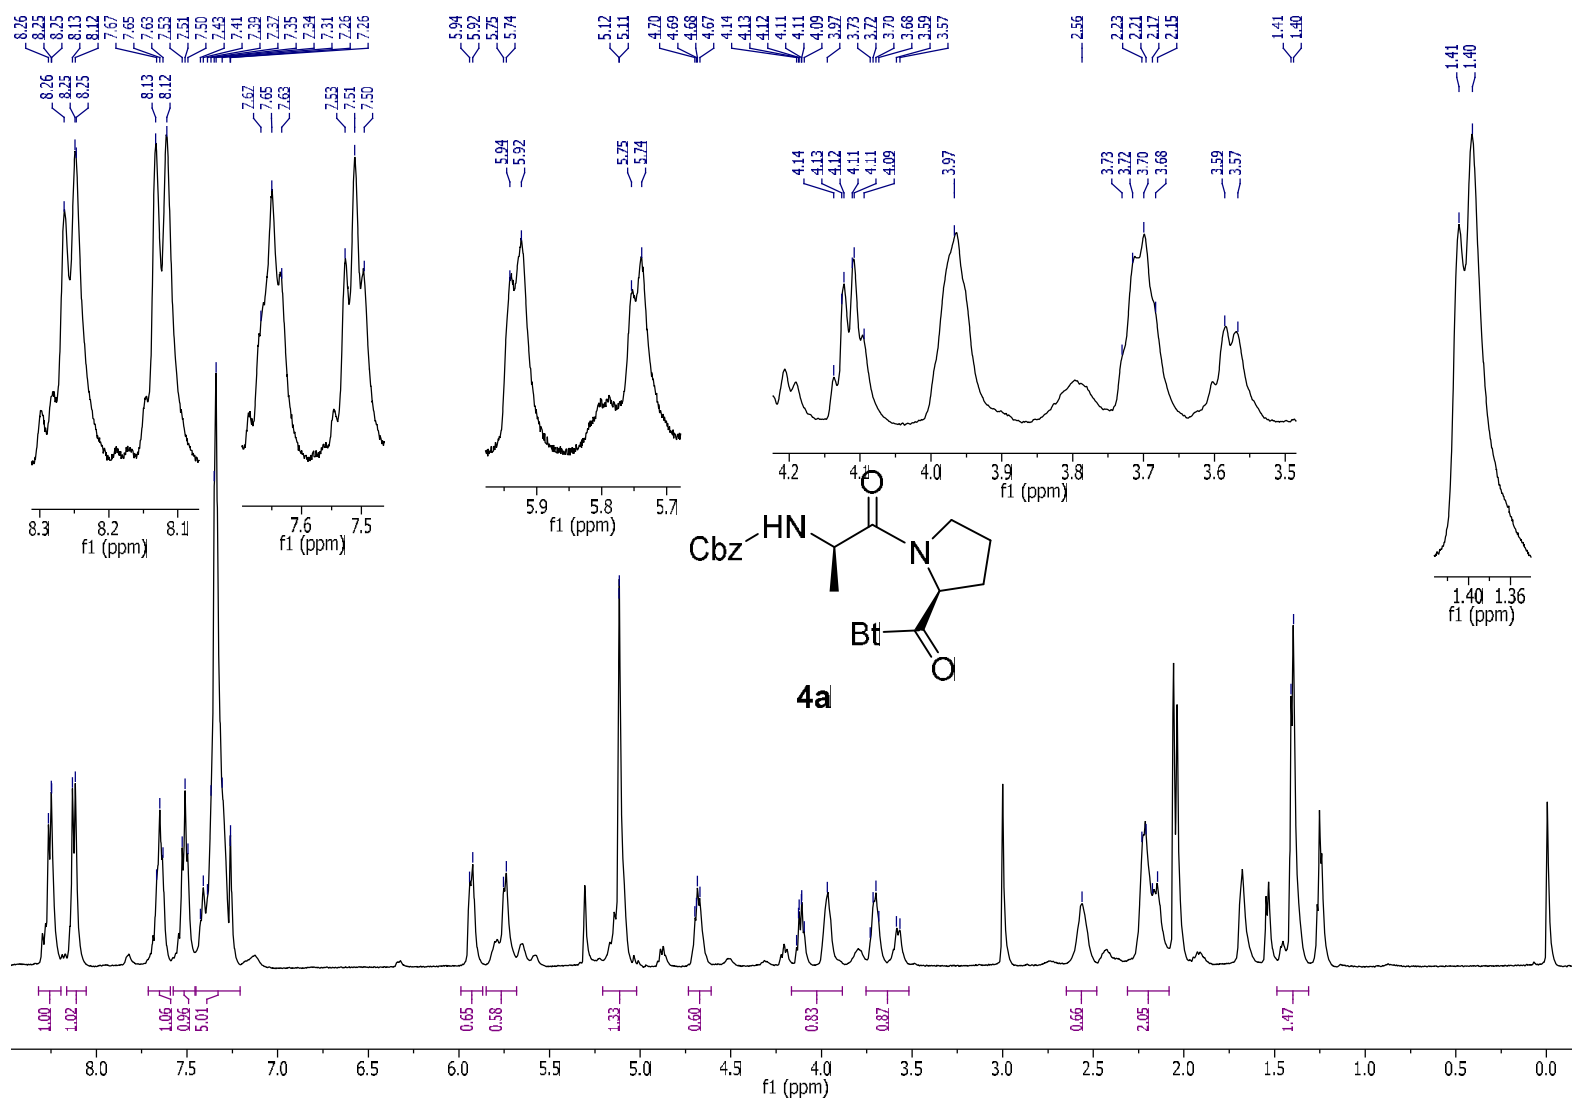

171.81  
171.36  
170.13  
167.38  
165.94

155.60

146.08

136.53

131.27

130.79

130.62

130.49

128.76

128.54

128.02

126.57

126.47

126.24

120.28

114.57

114.46

69.27

66.83

60.47

59.76

59.42

50.67

48.57

47.46

45.64

38.28

29.72

29.17

25.04

24.25

23.29

22.74

21.13

20.67

18.99

18.74

17.31

16.09

14.30

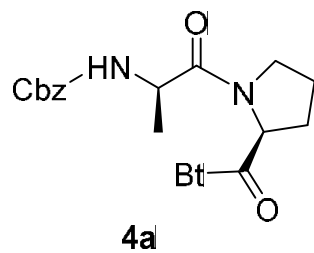

131.27

130.79

130.62

130.49

128.76

128.54

128.02

126.57

126.47

126.24

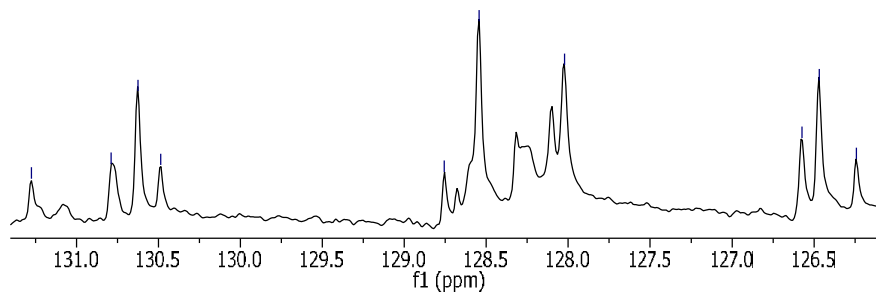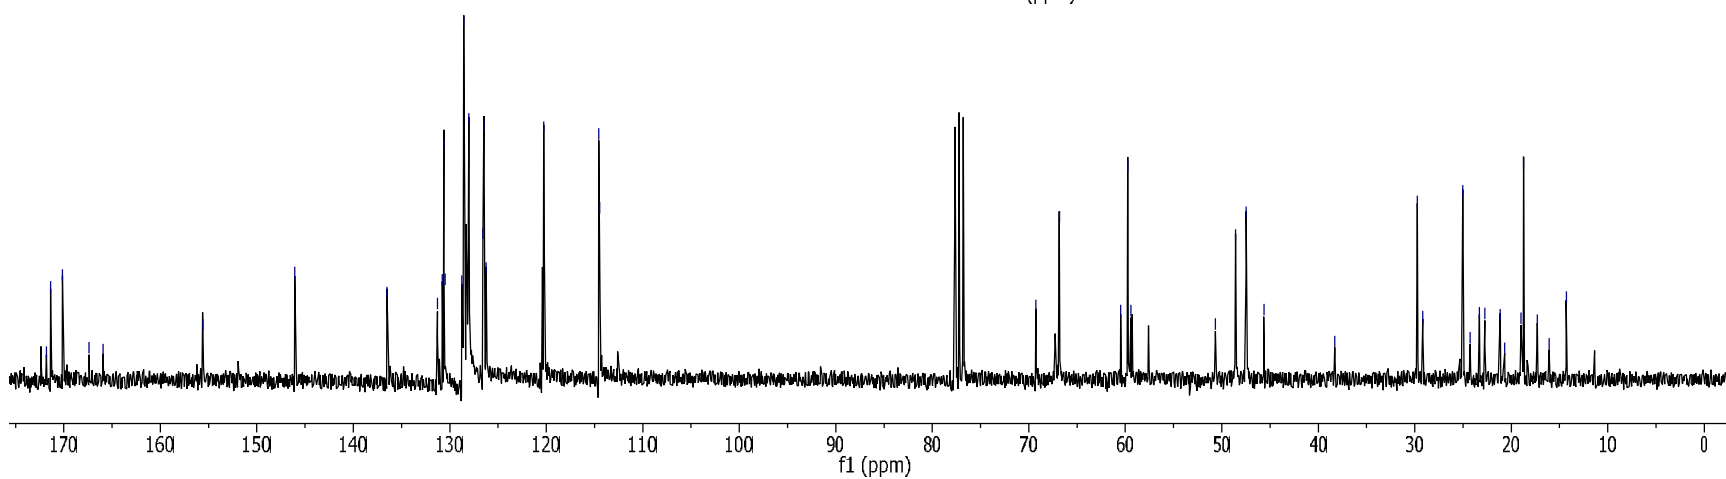

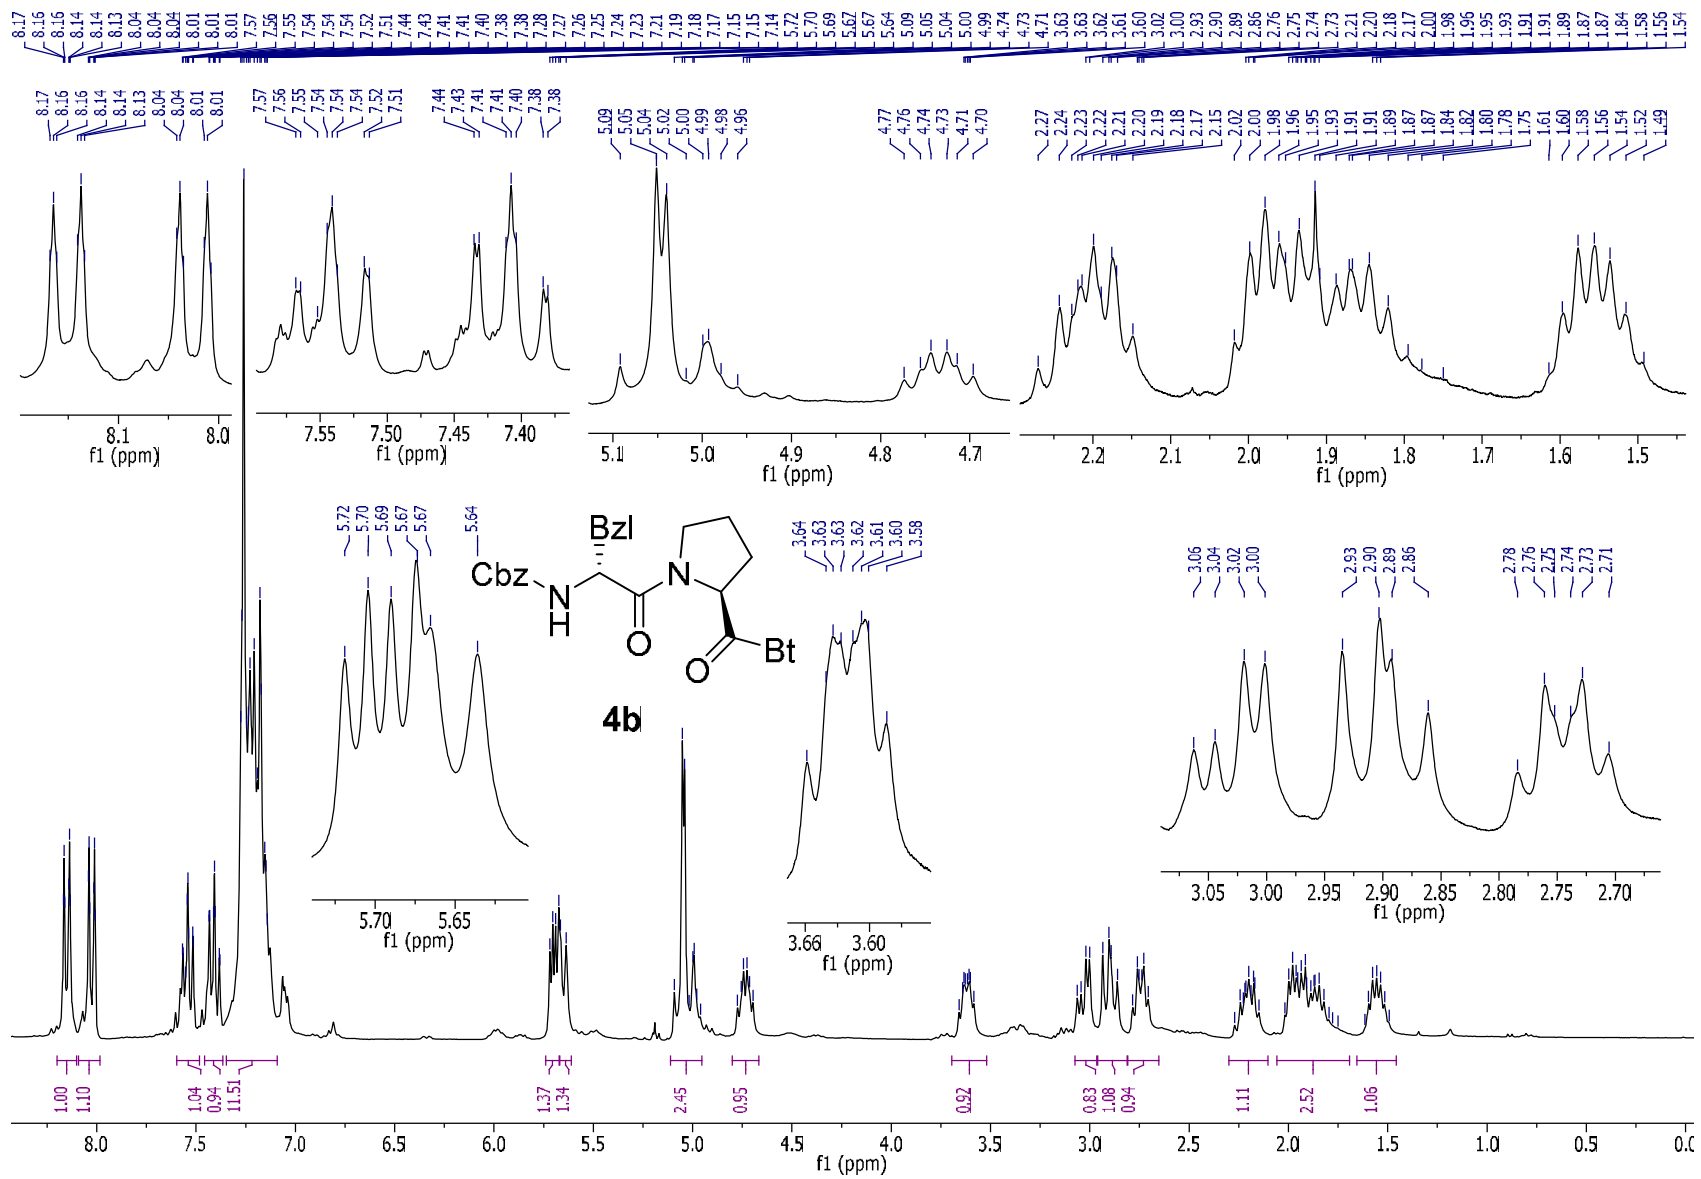

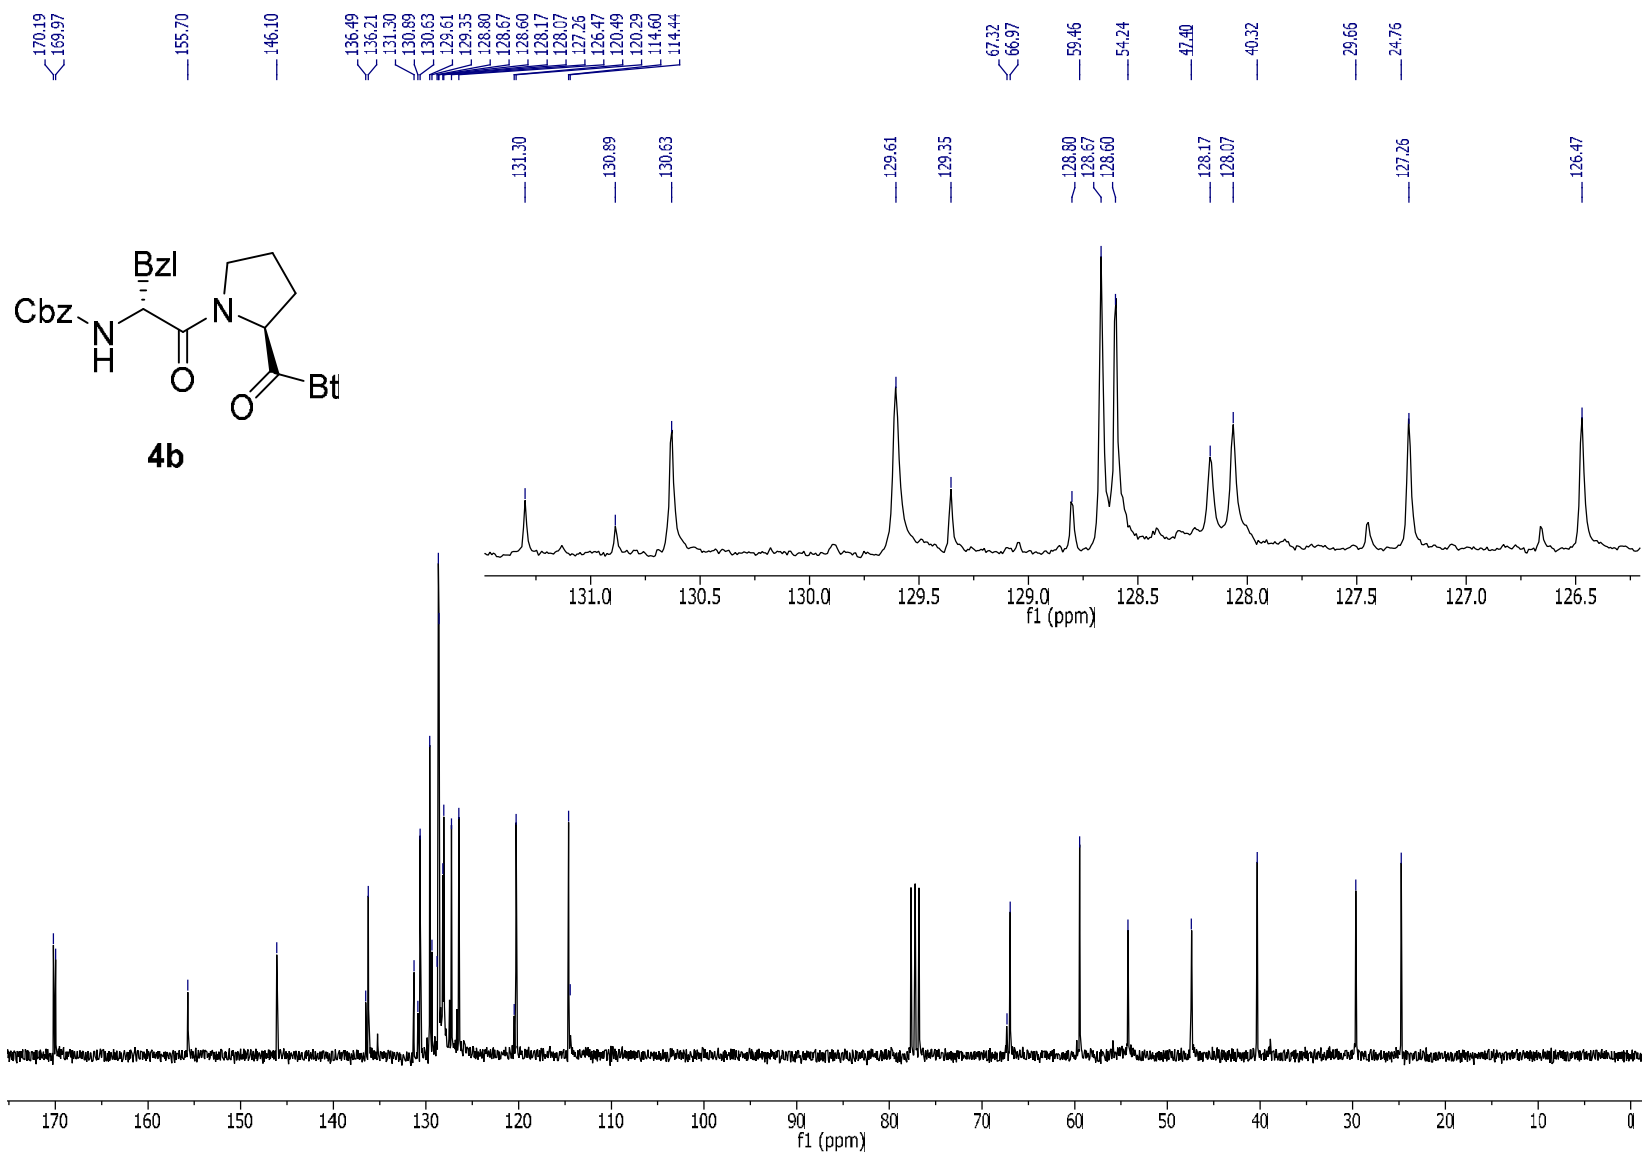

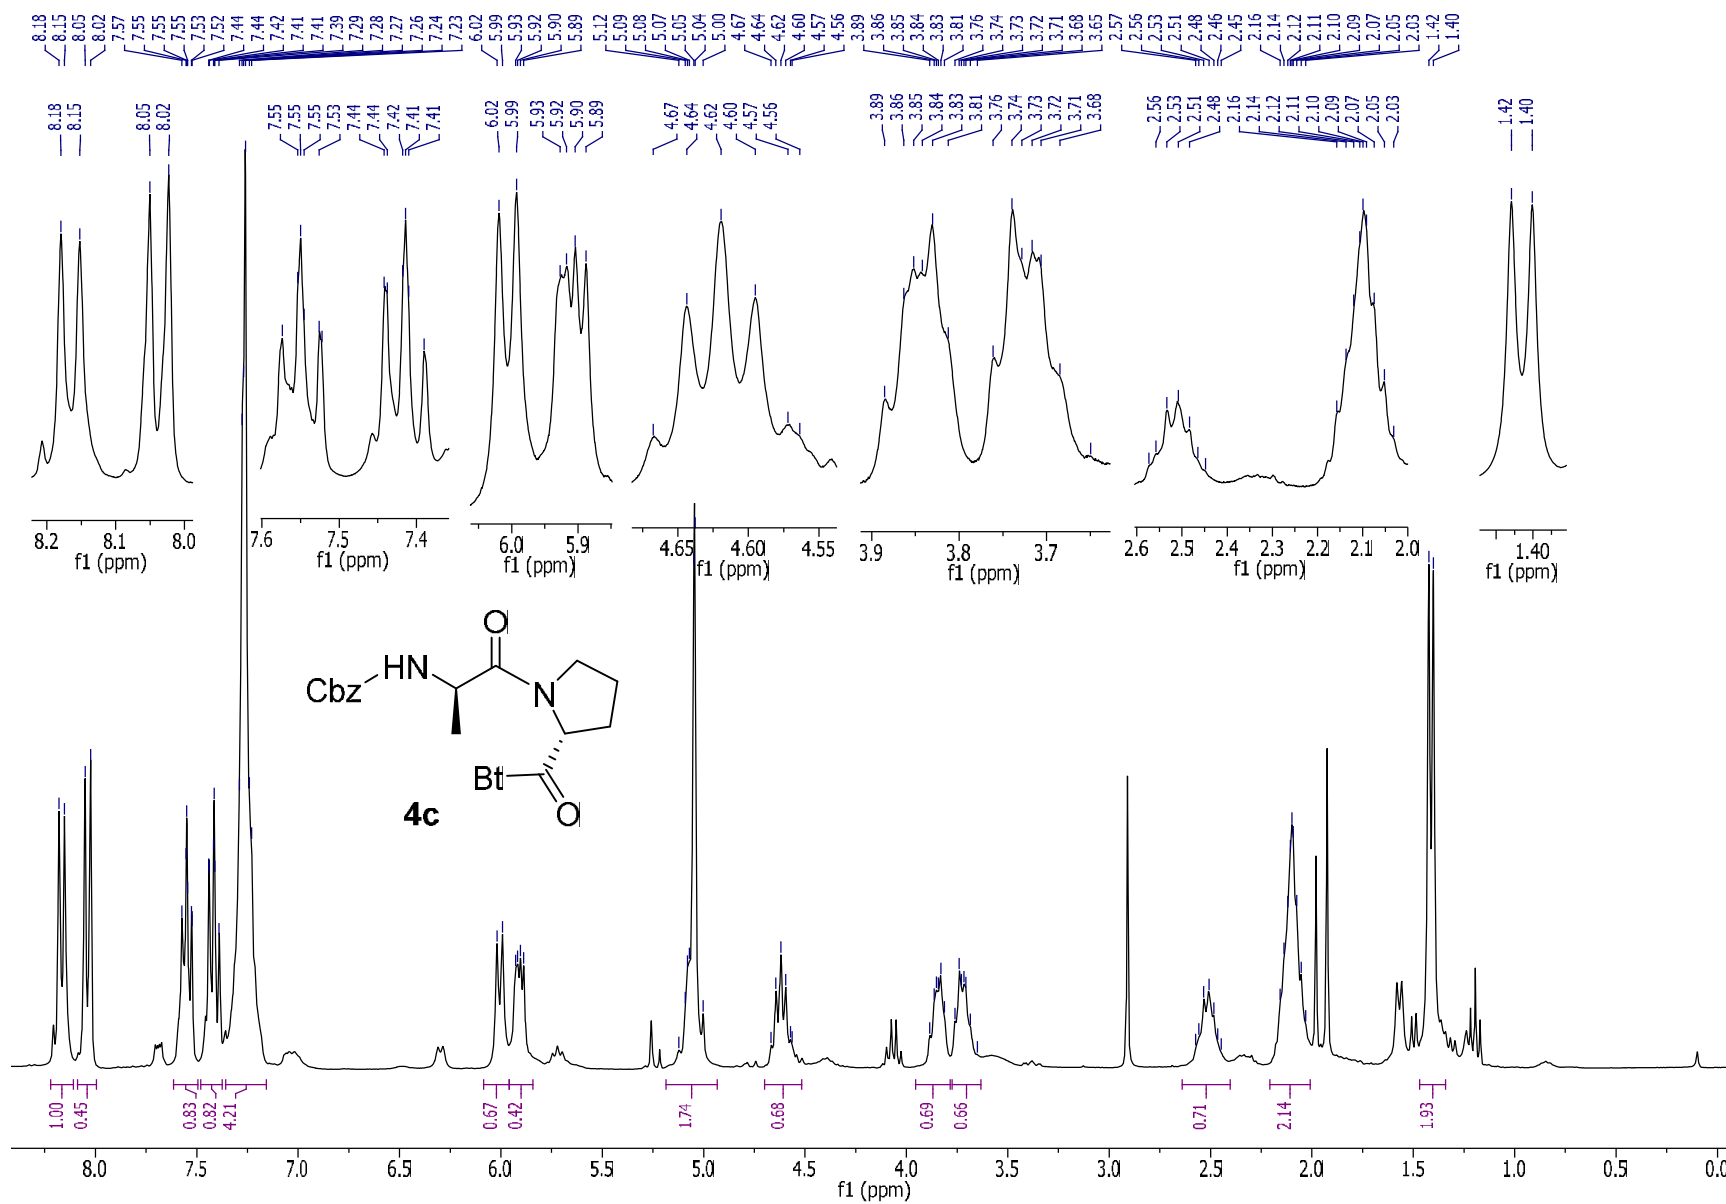

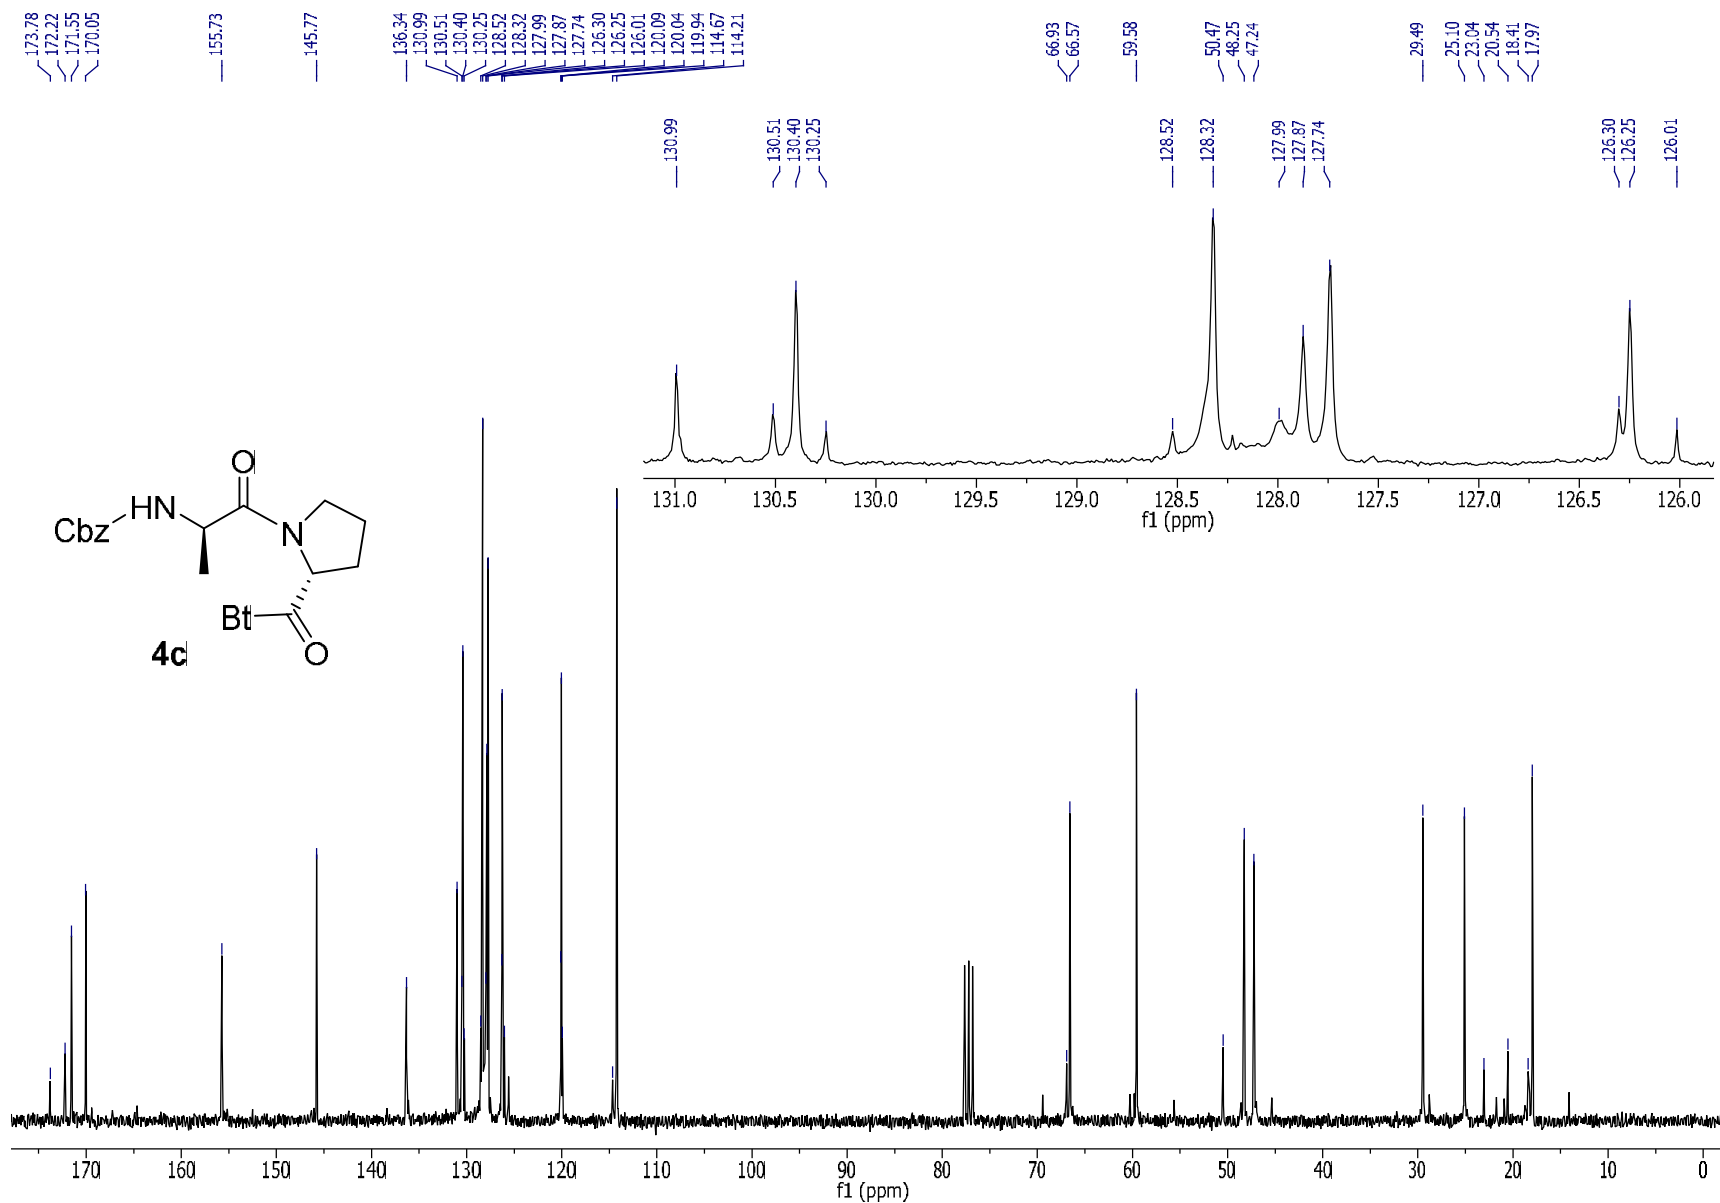

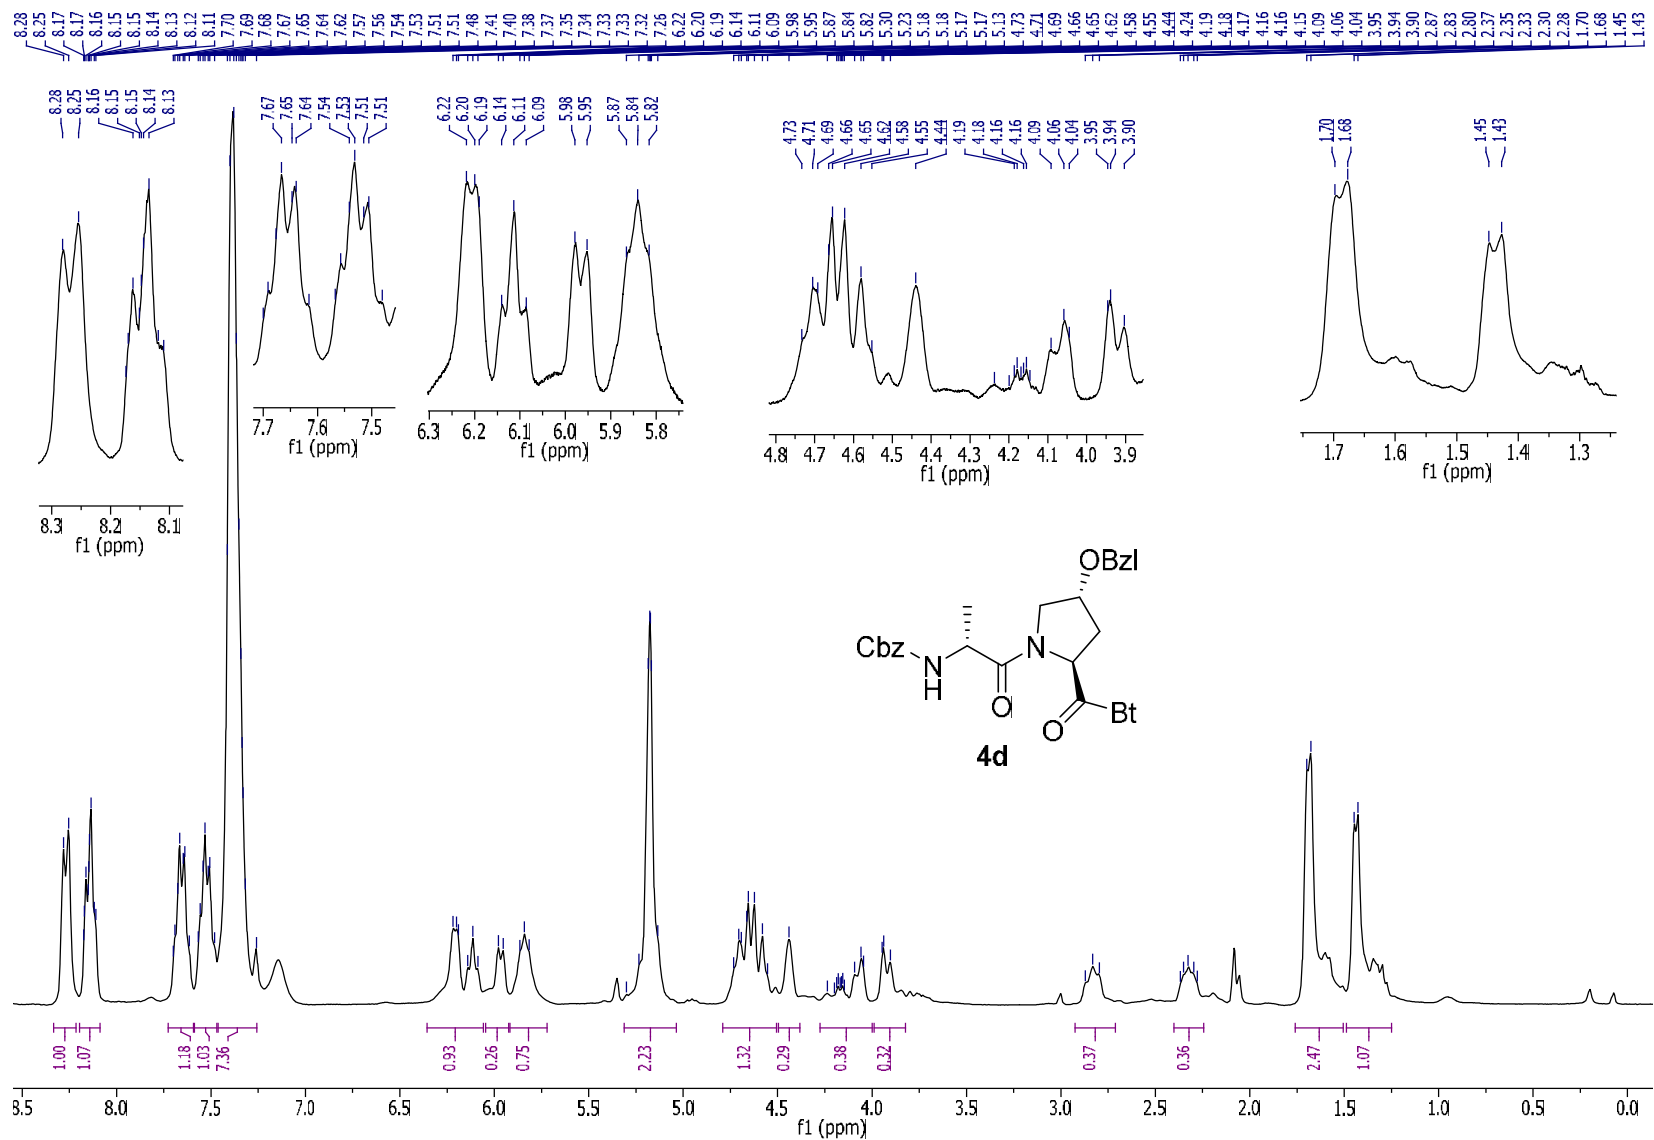

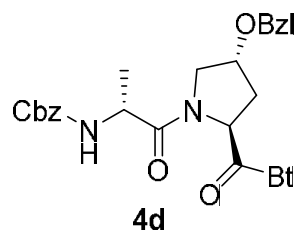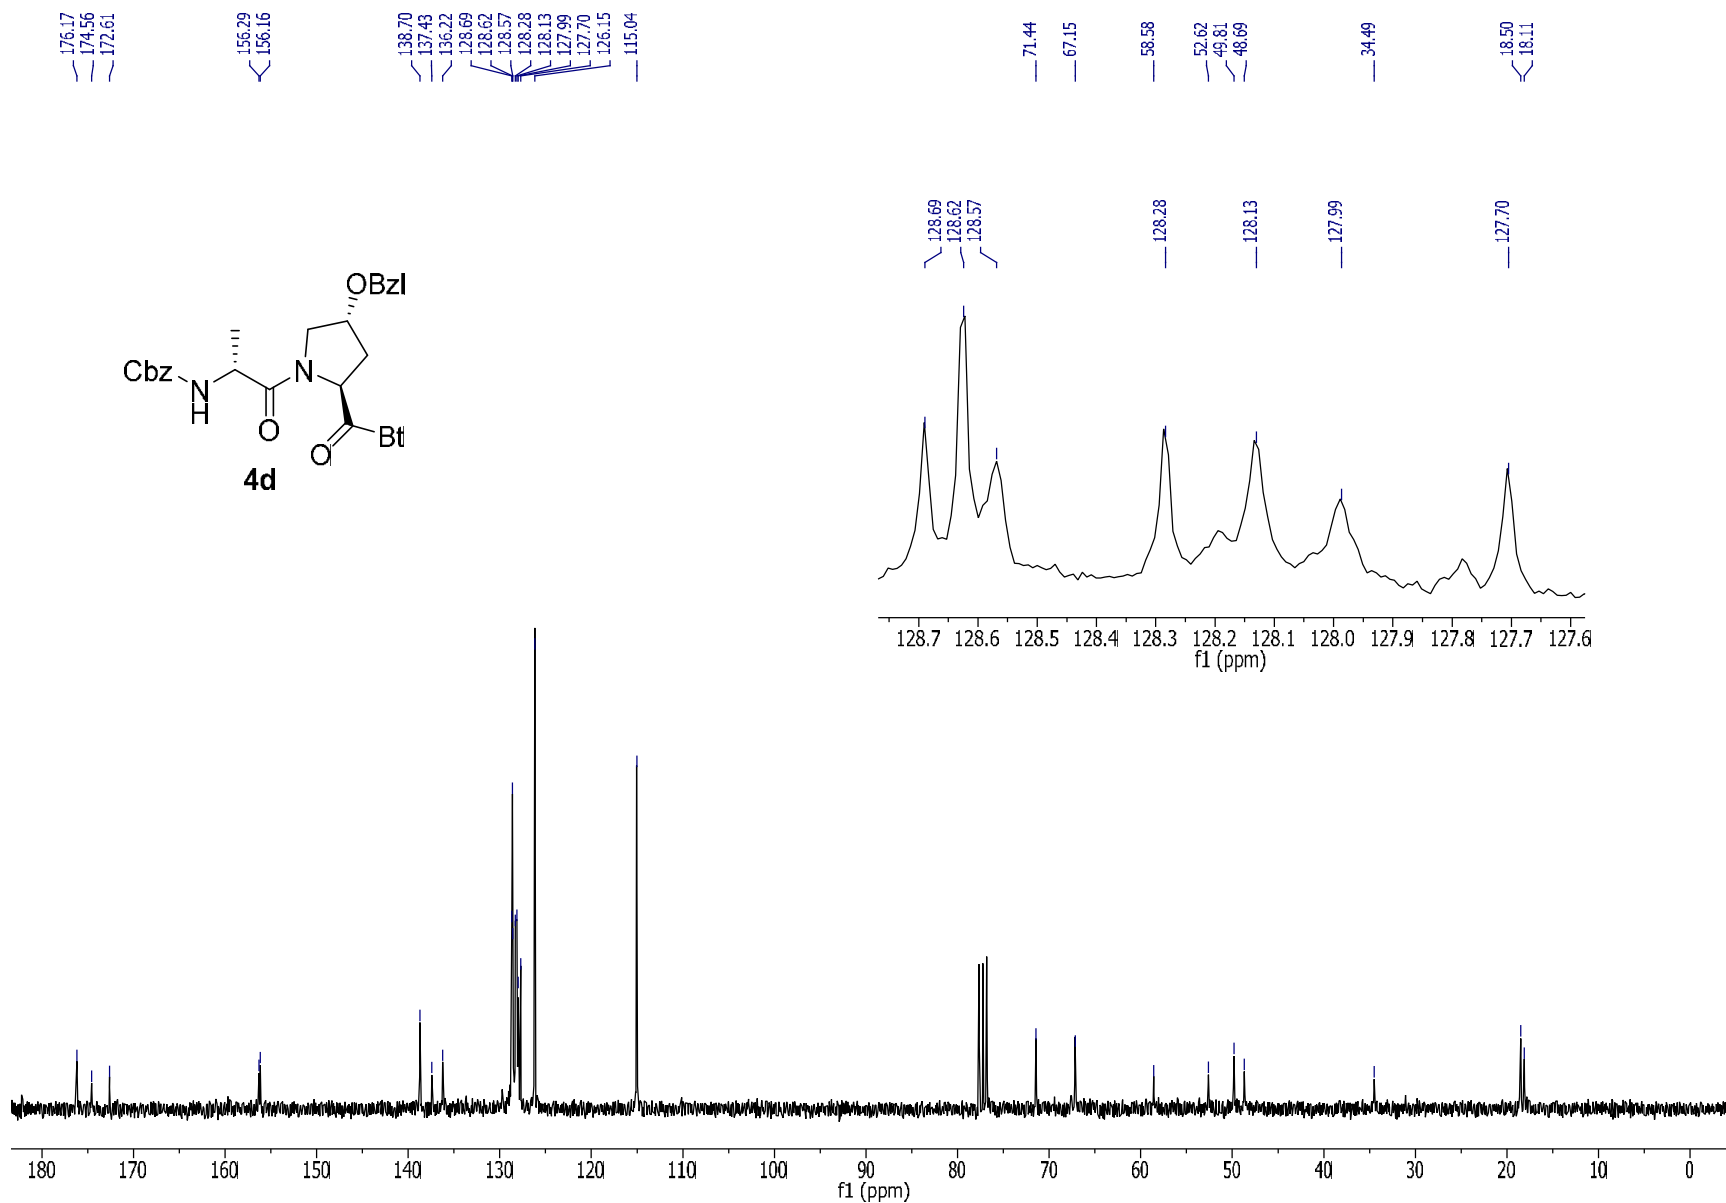



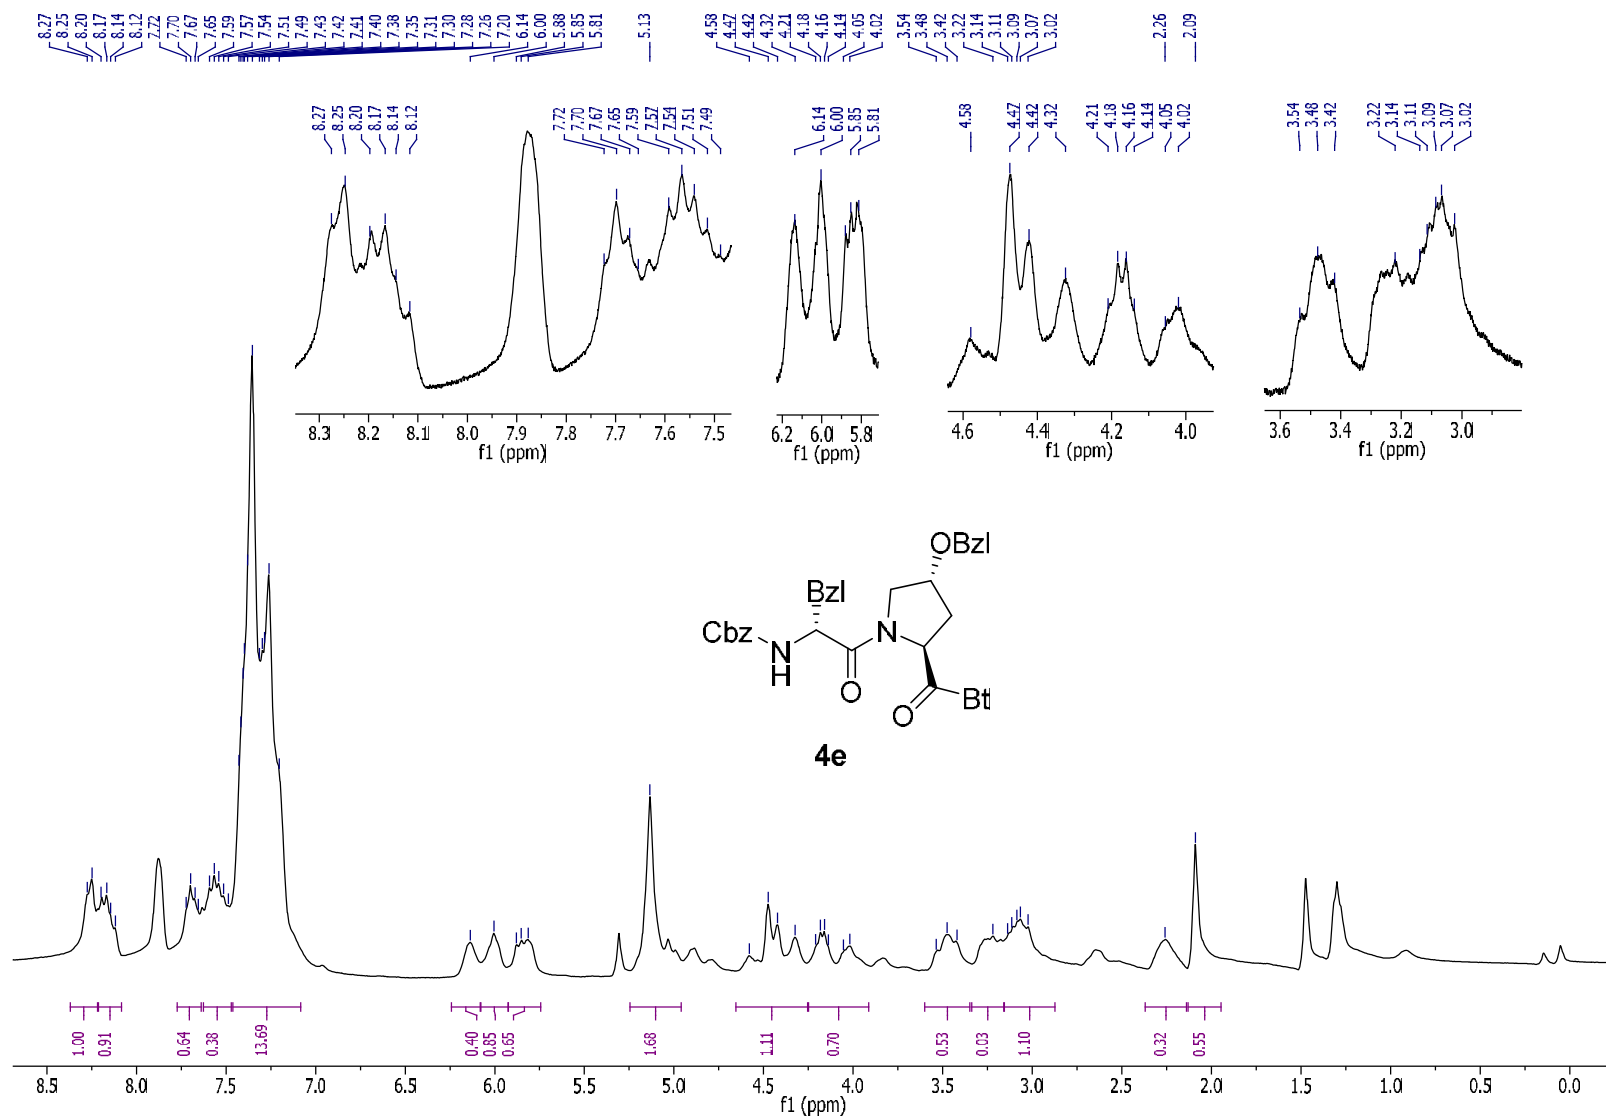

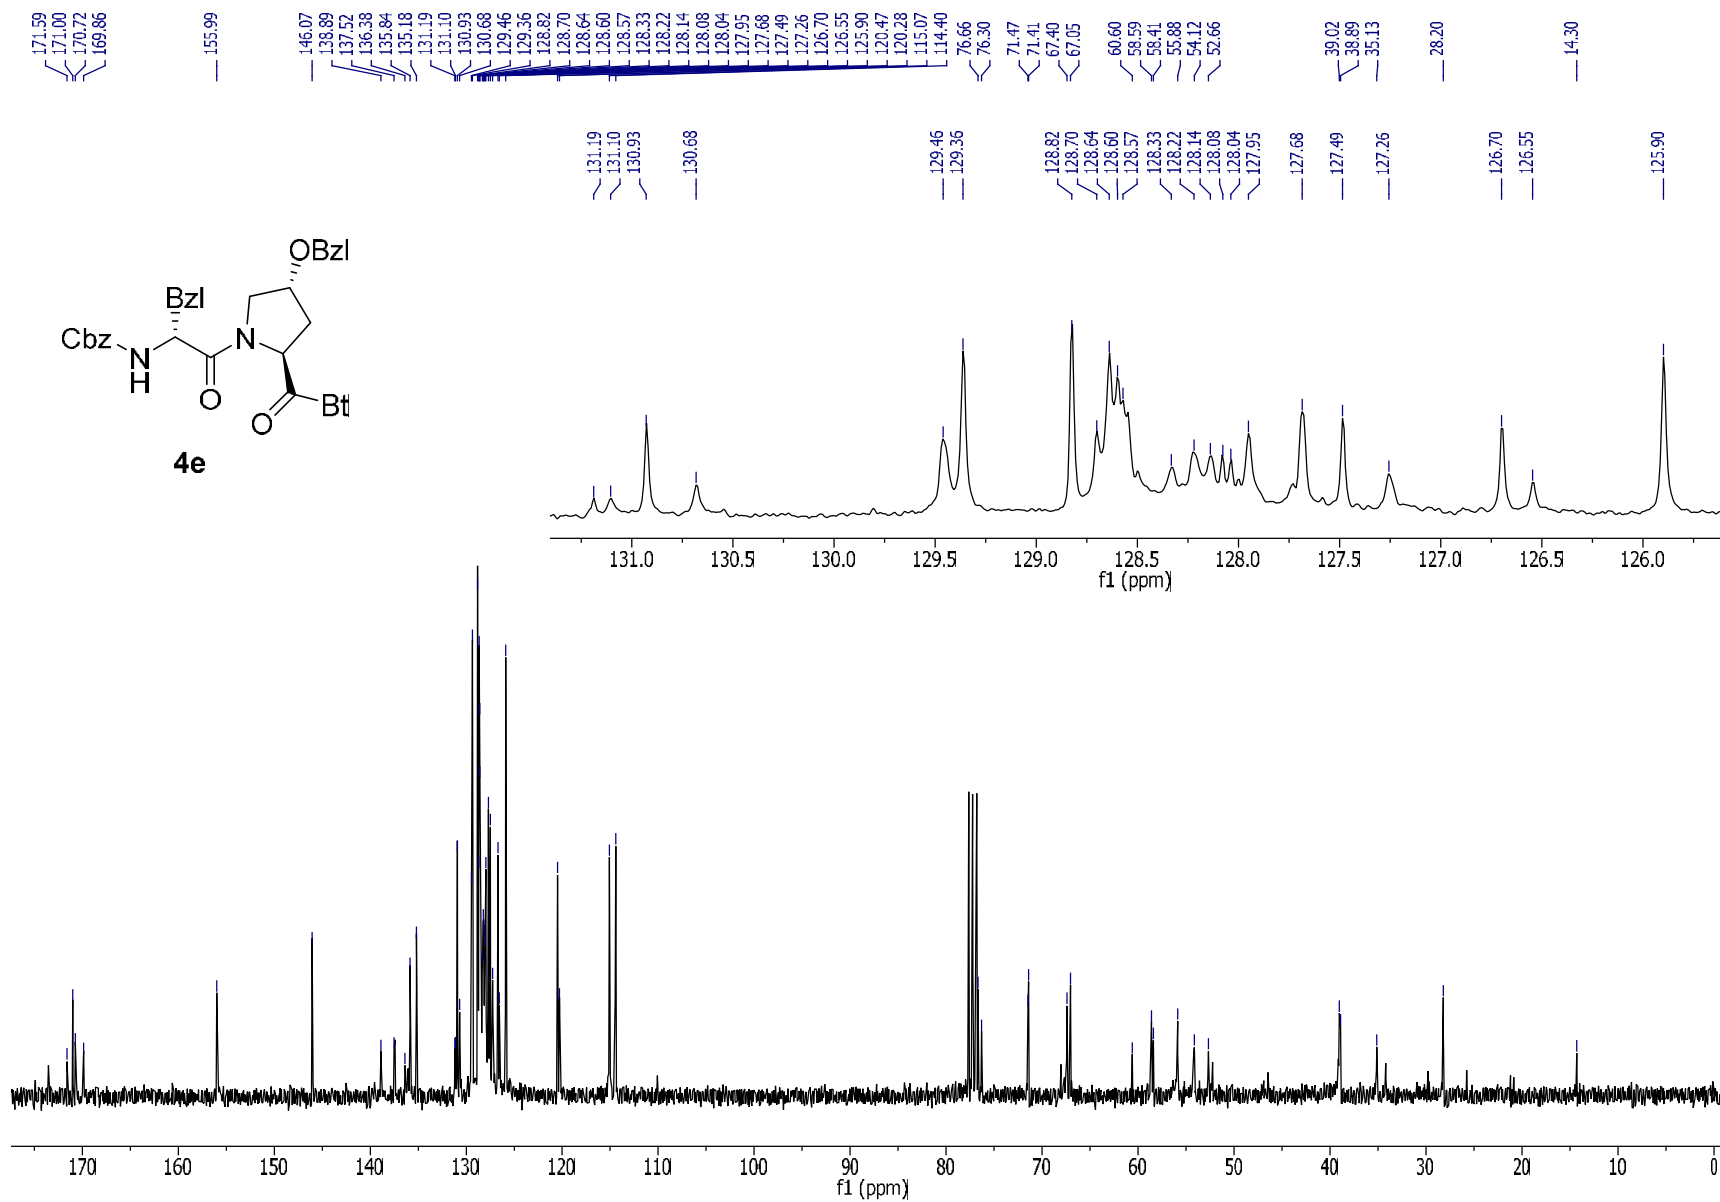

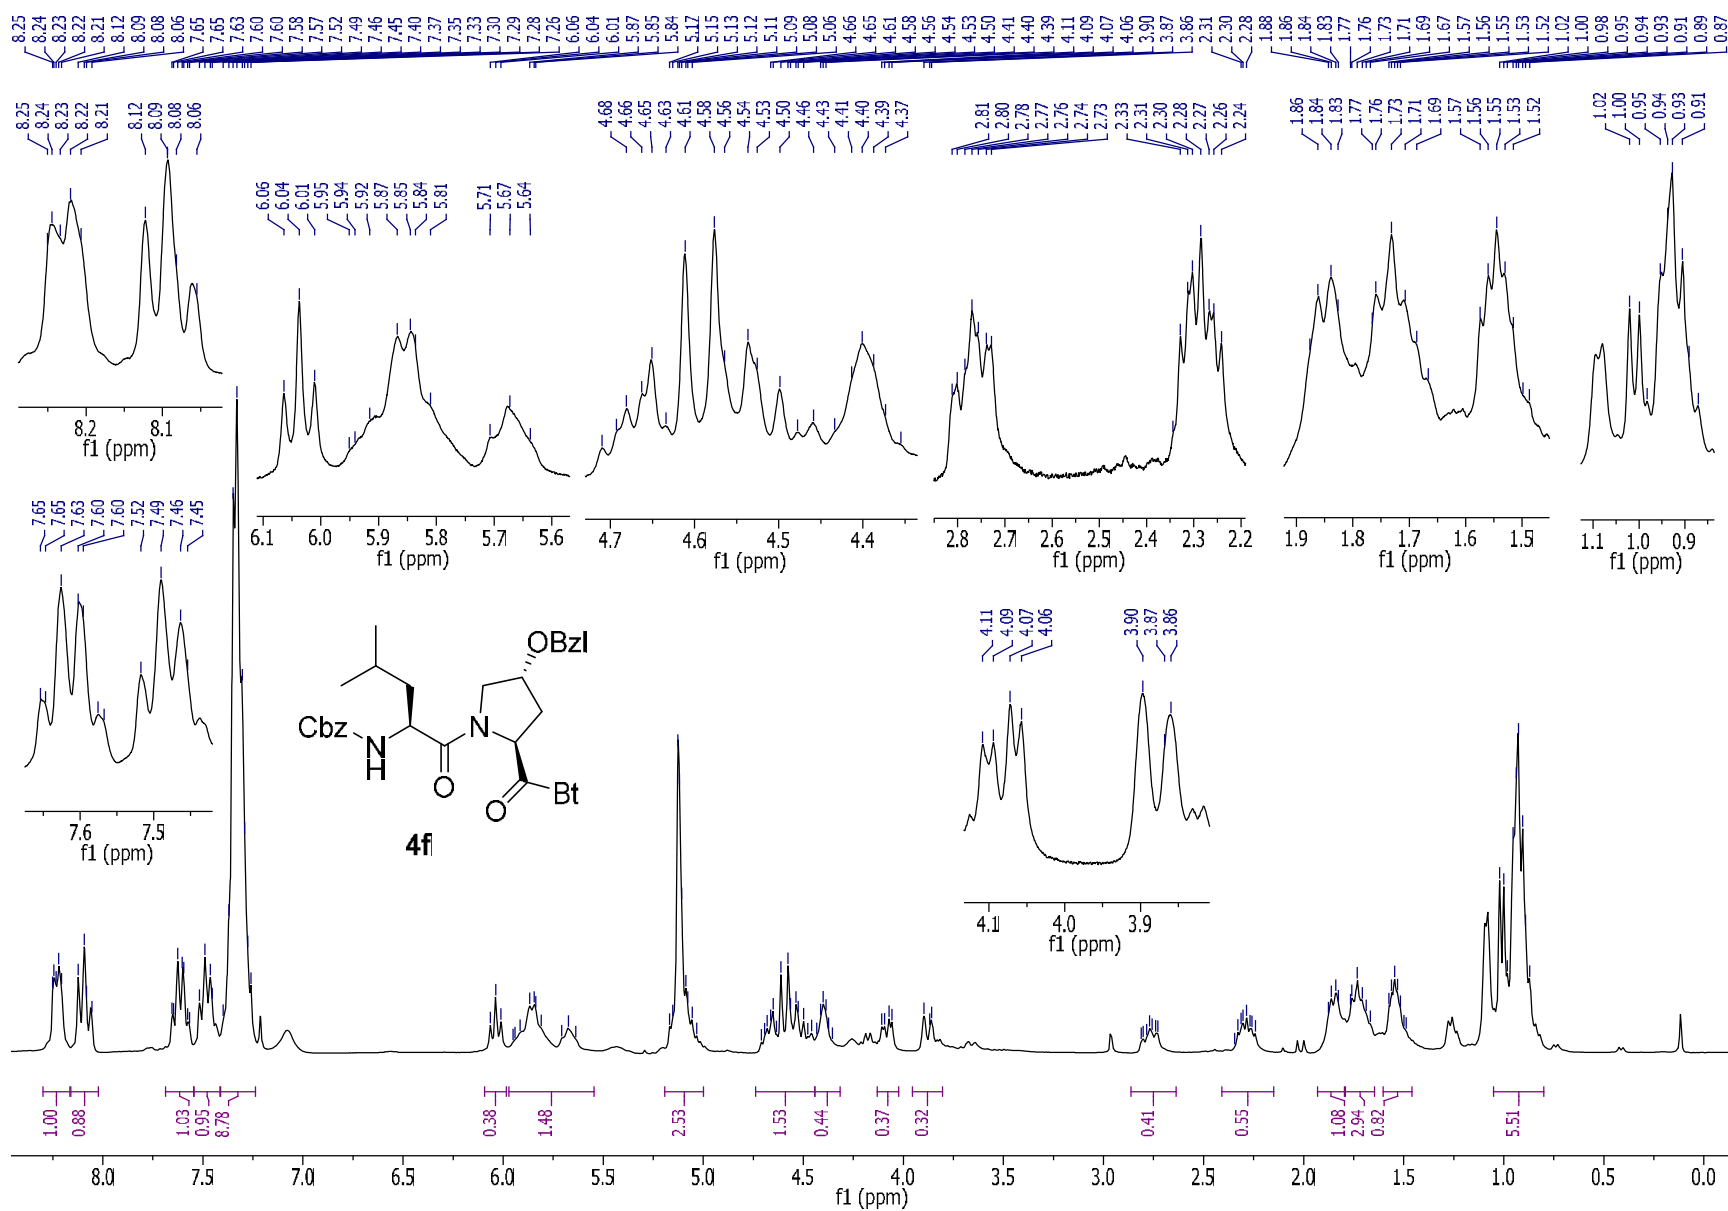

172.55  
171.72  
170.04  
156.24  
146.05  
137.41  
136.45  
131.17  
130.67  
130.53  
128.63  
128.49  
128.18  
128.05  
127.92  
127.54  
126.46  
126.41  
120.31  
120.21  
114.53  
114.41

71.39  
67.25  
66.90  
58.56  
53.50  
52.73  
50.96  
42.20  
41.80  
35.16  
25.24  
24.56  
23.88  
23.25  
21.99  
21.31

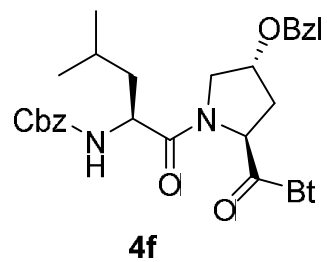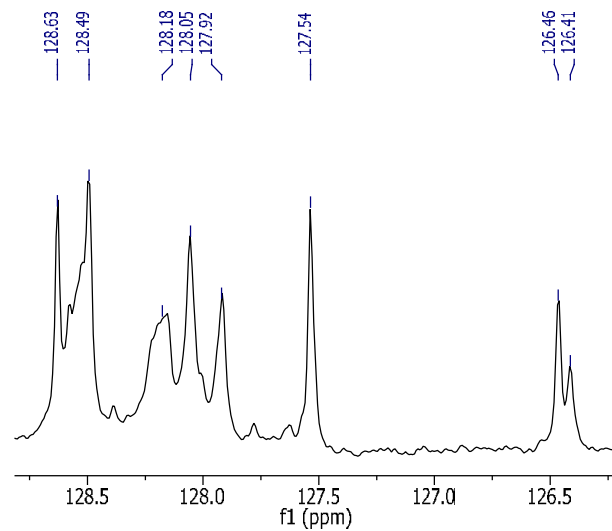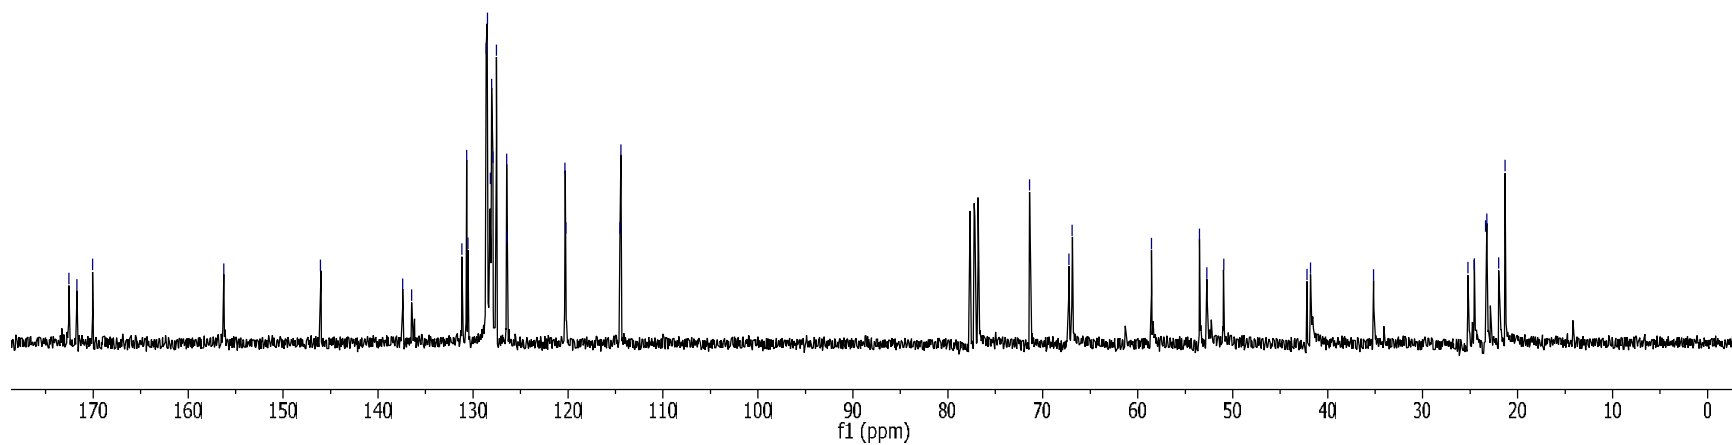

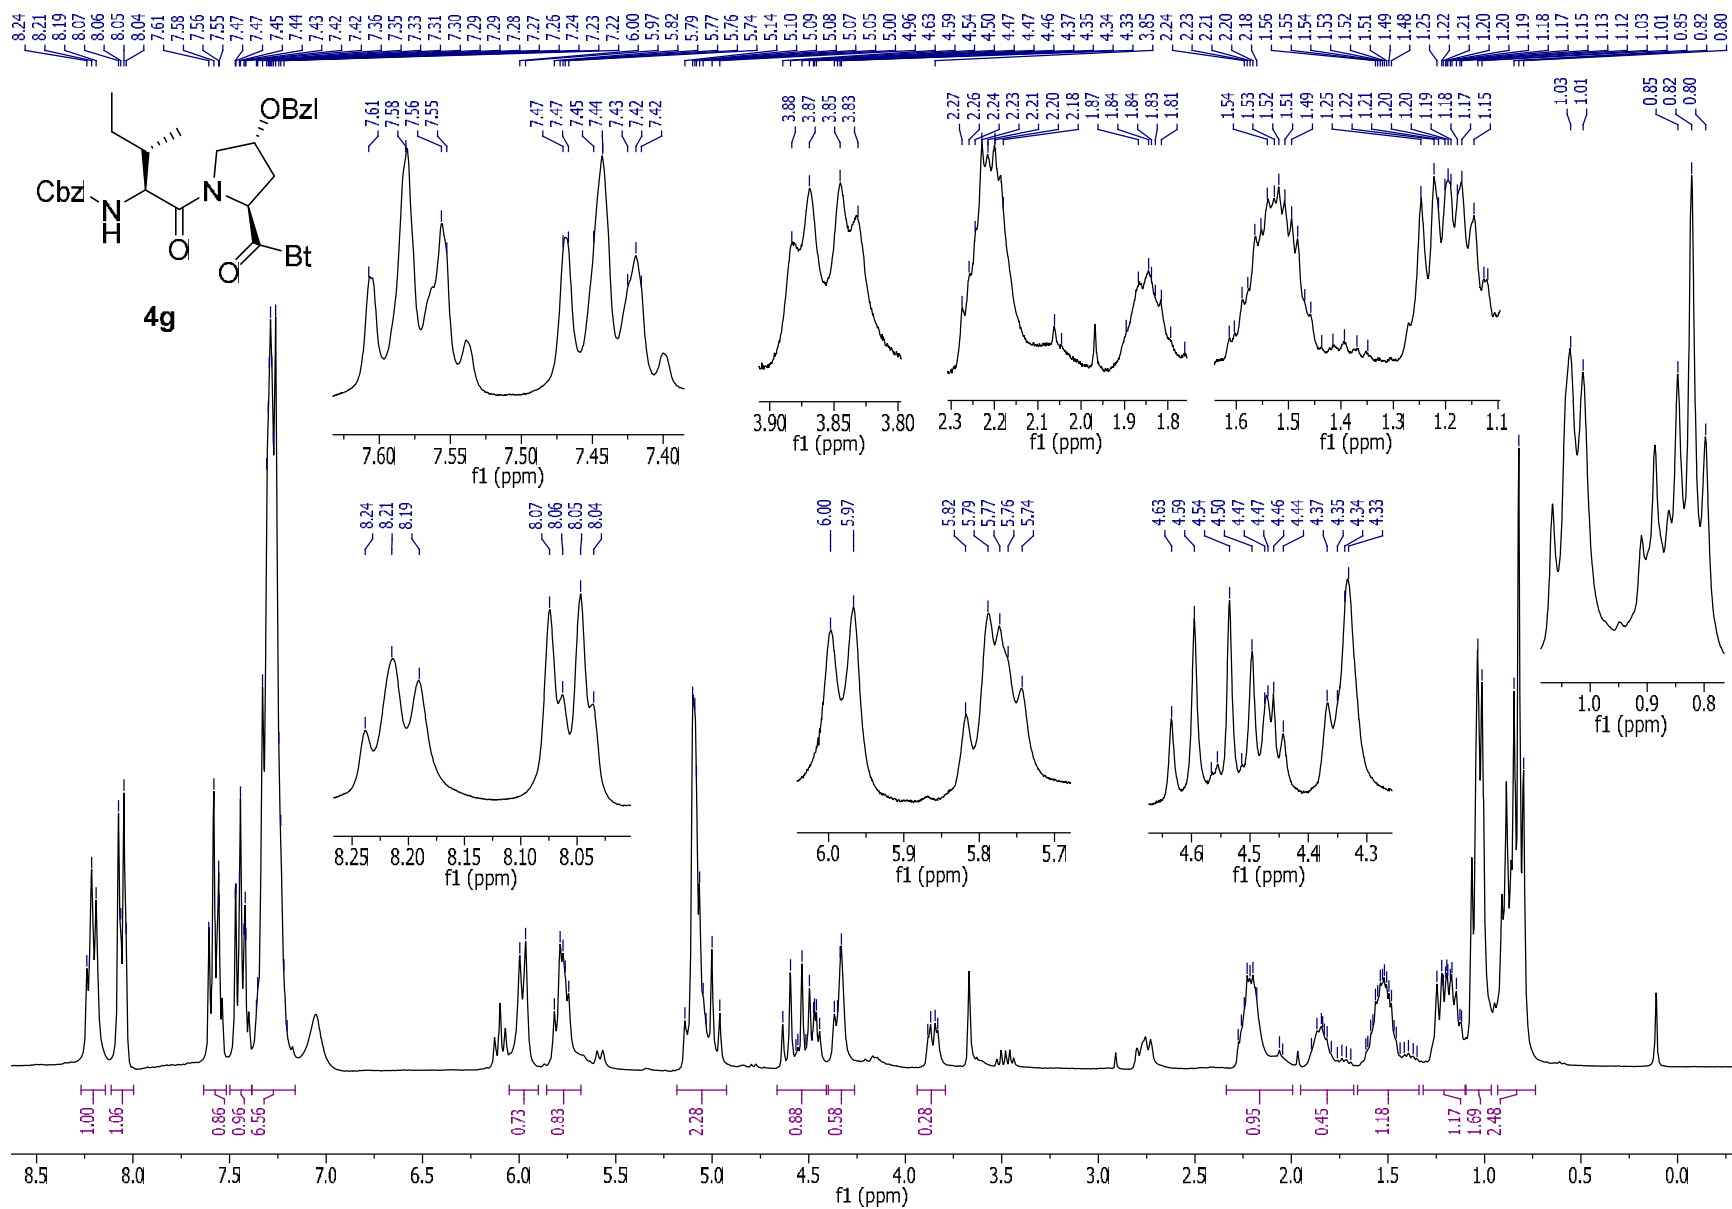

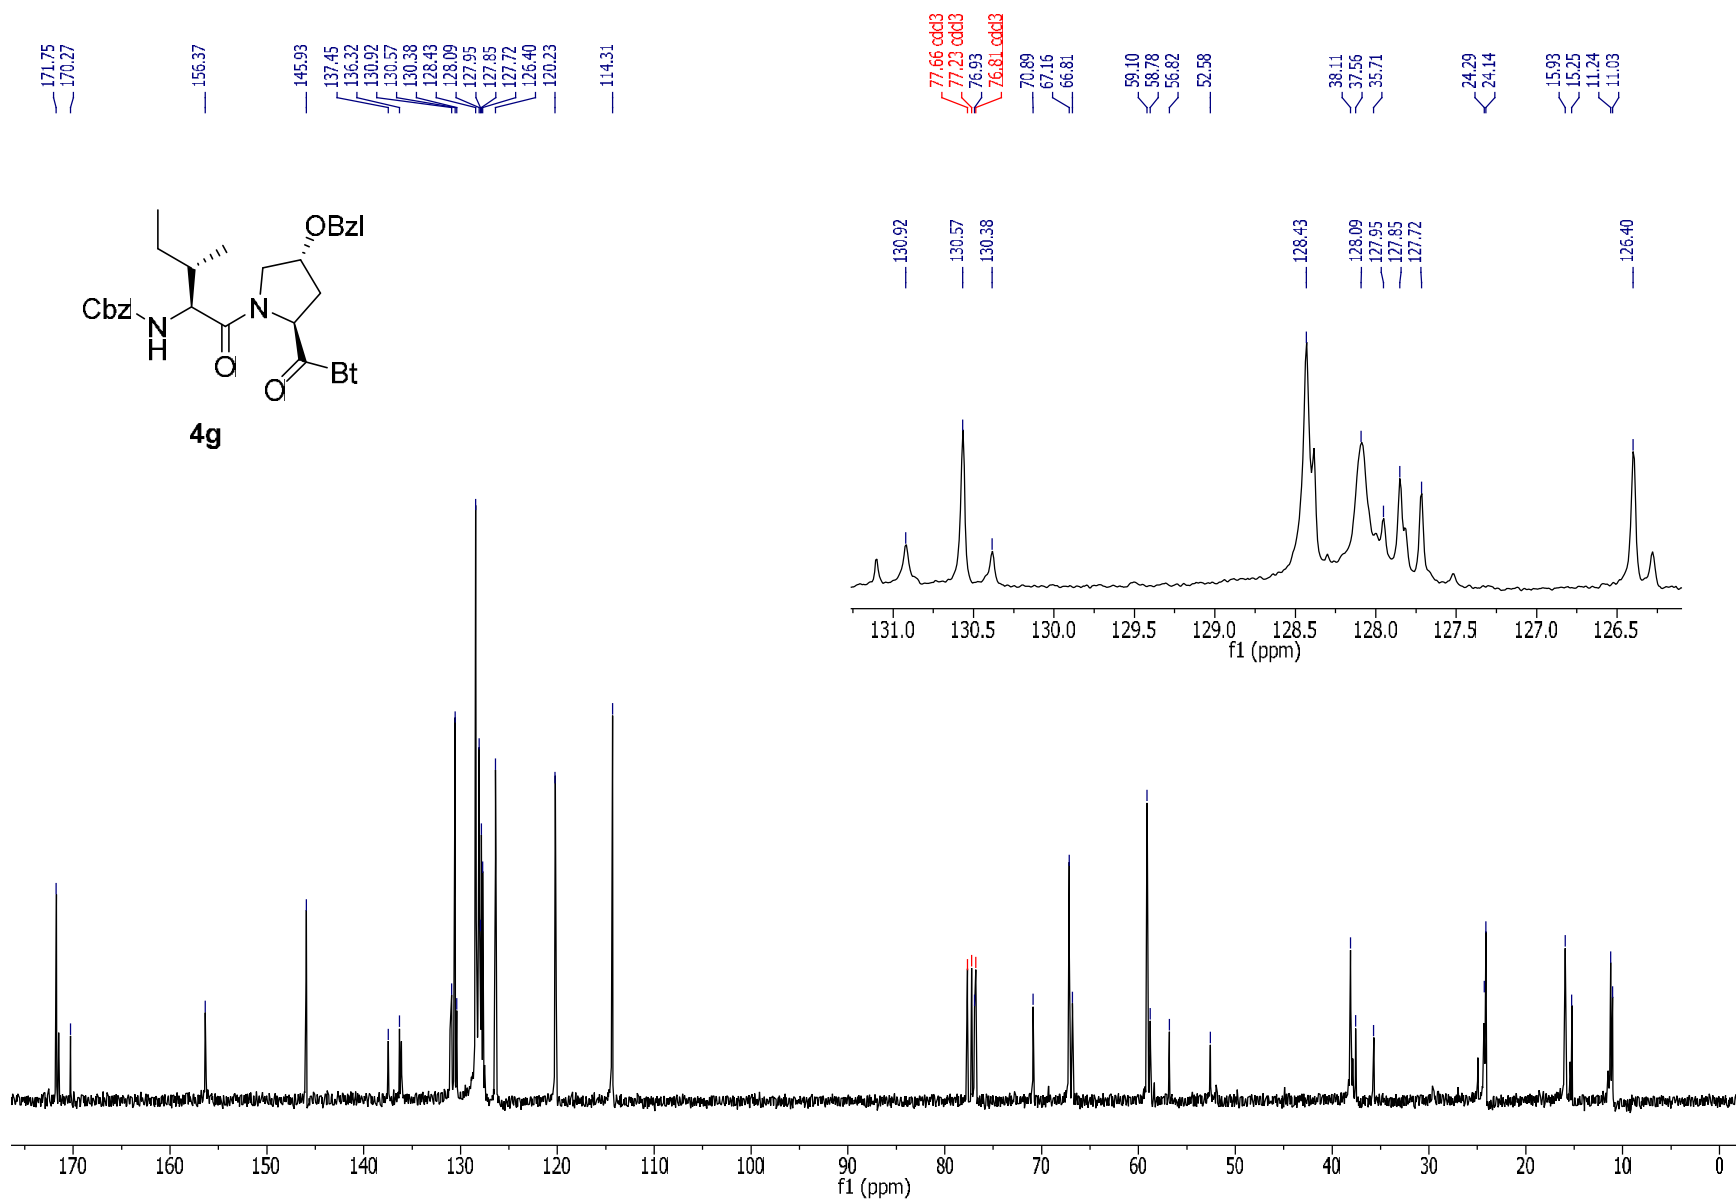

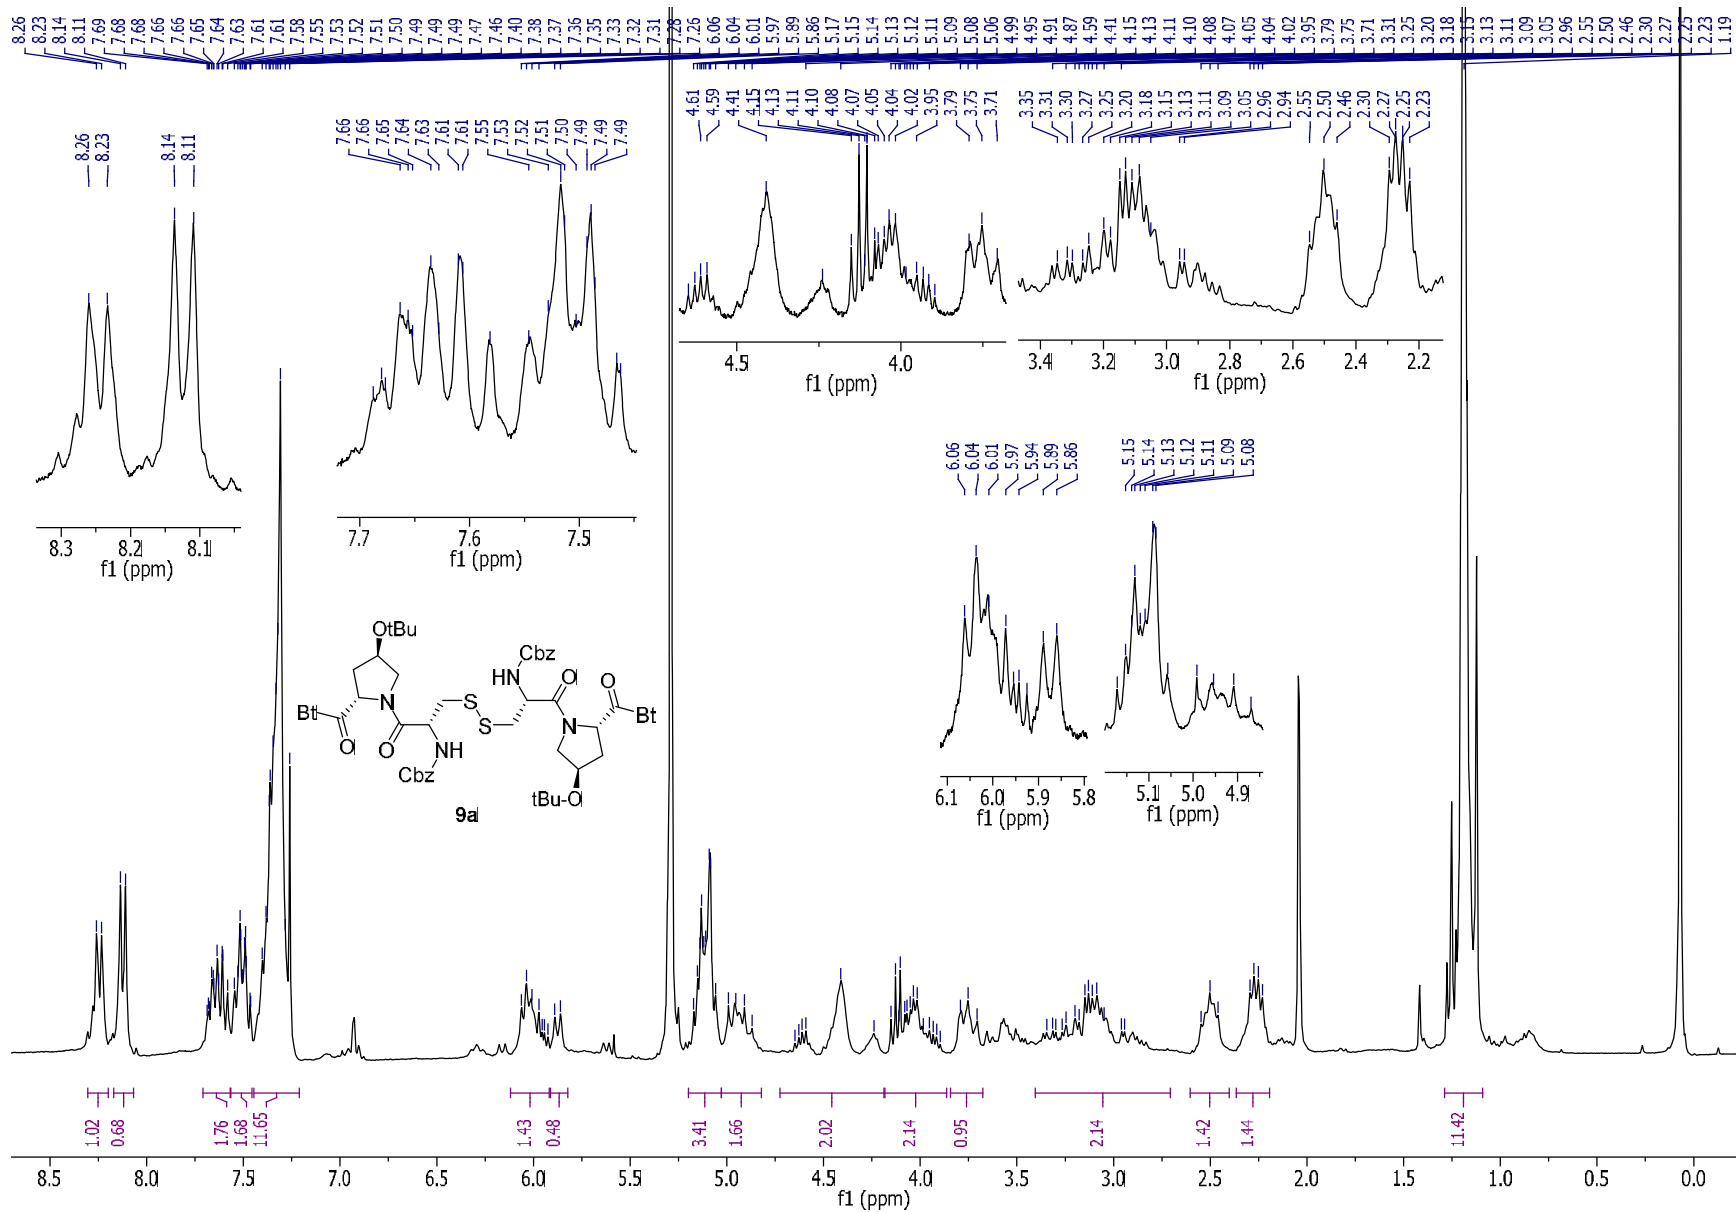

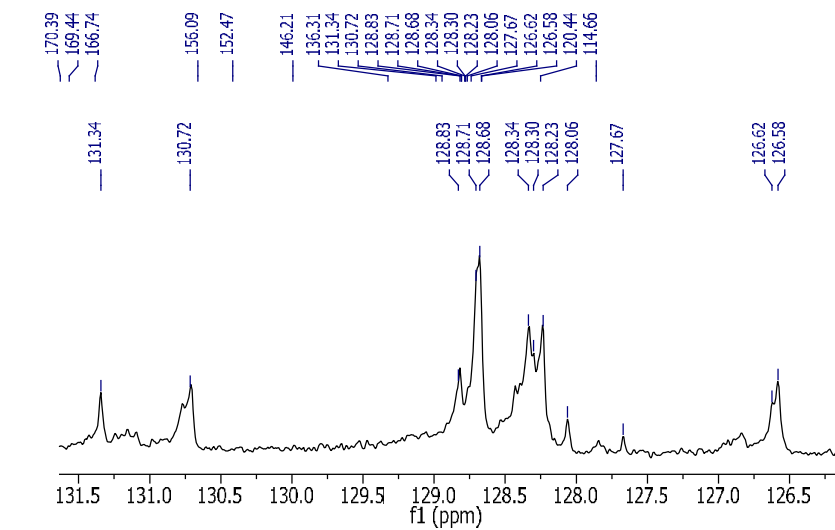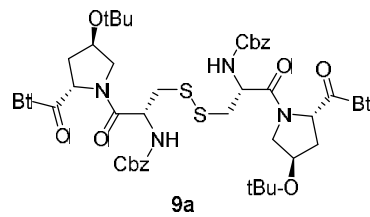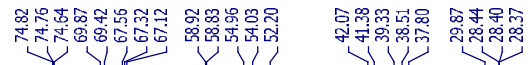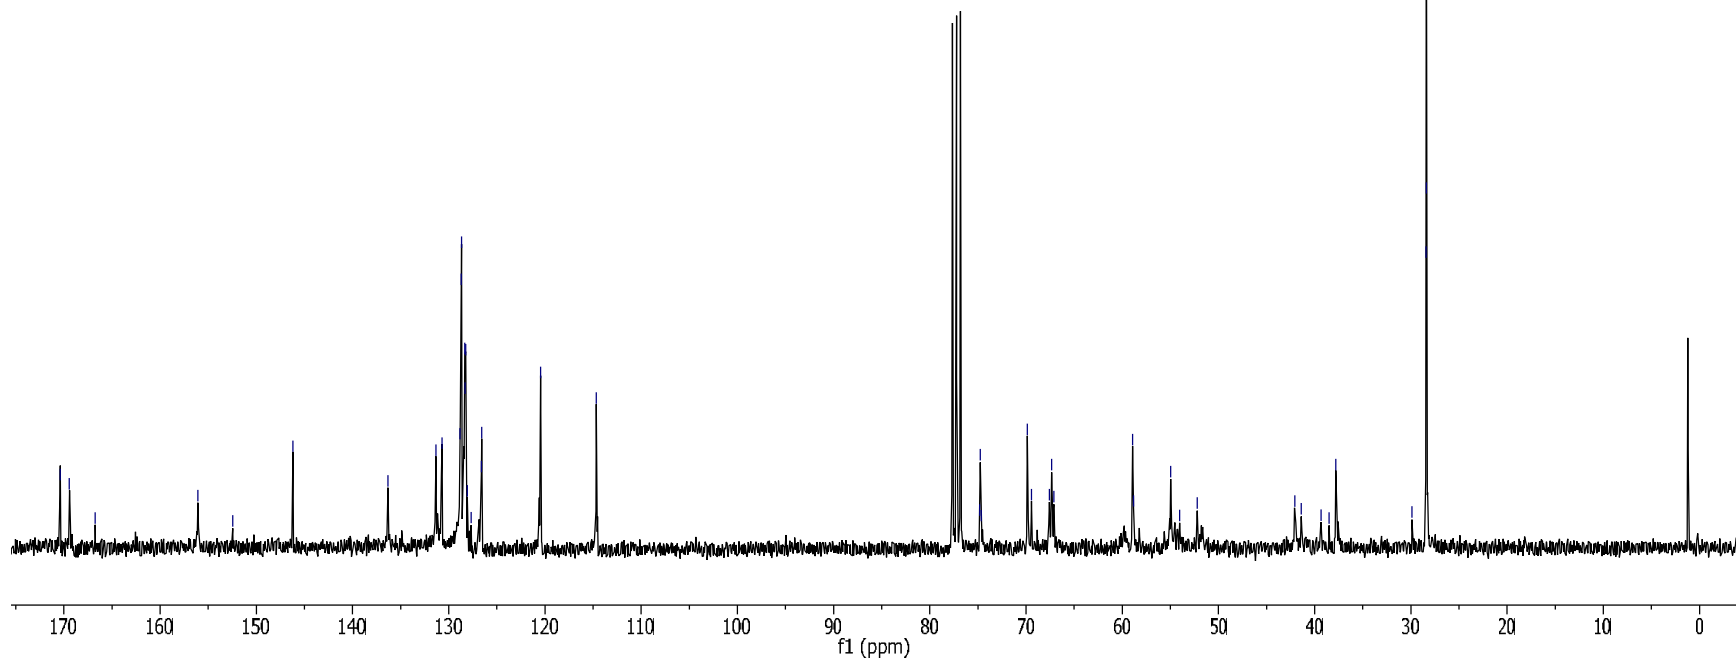



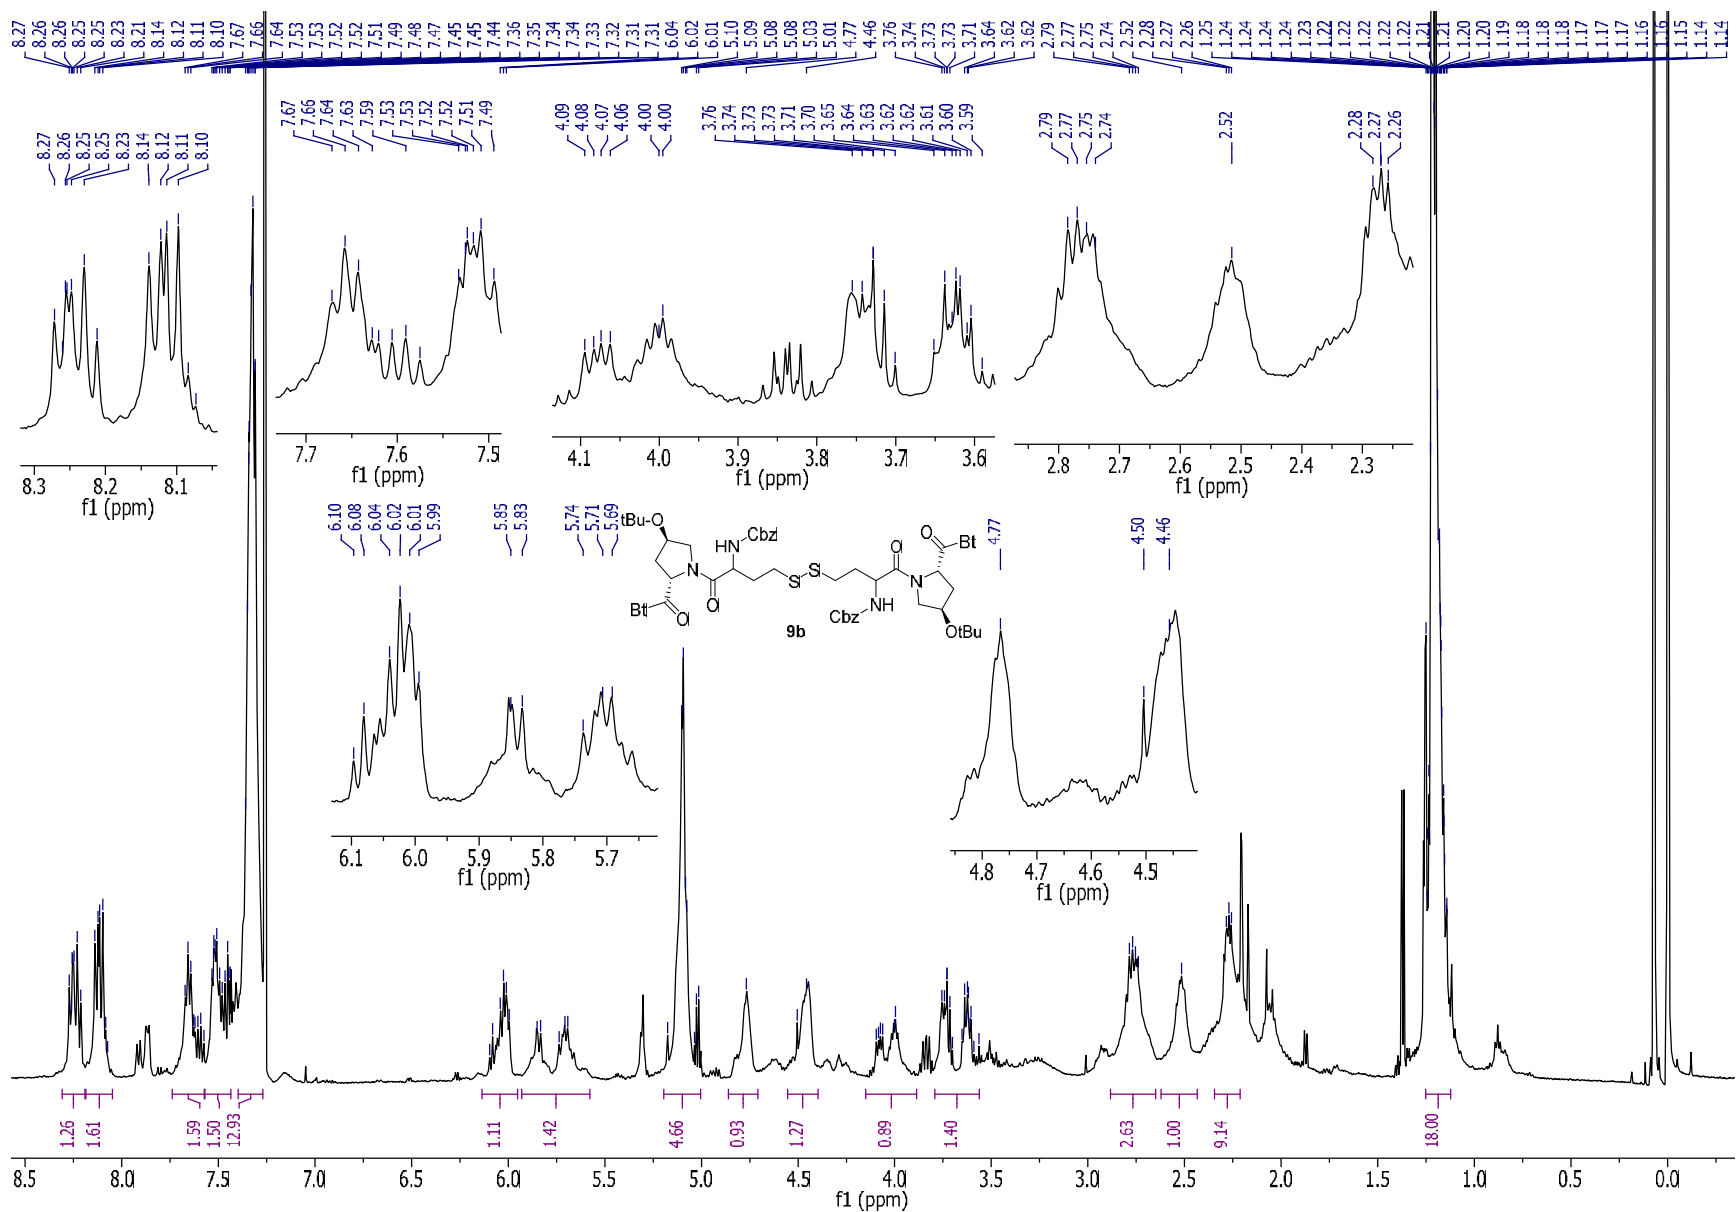

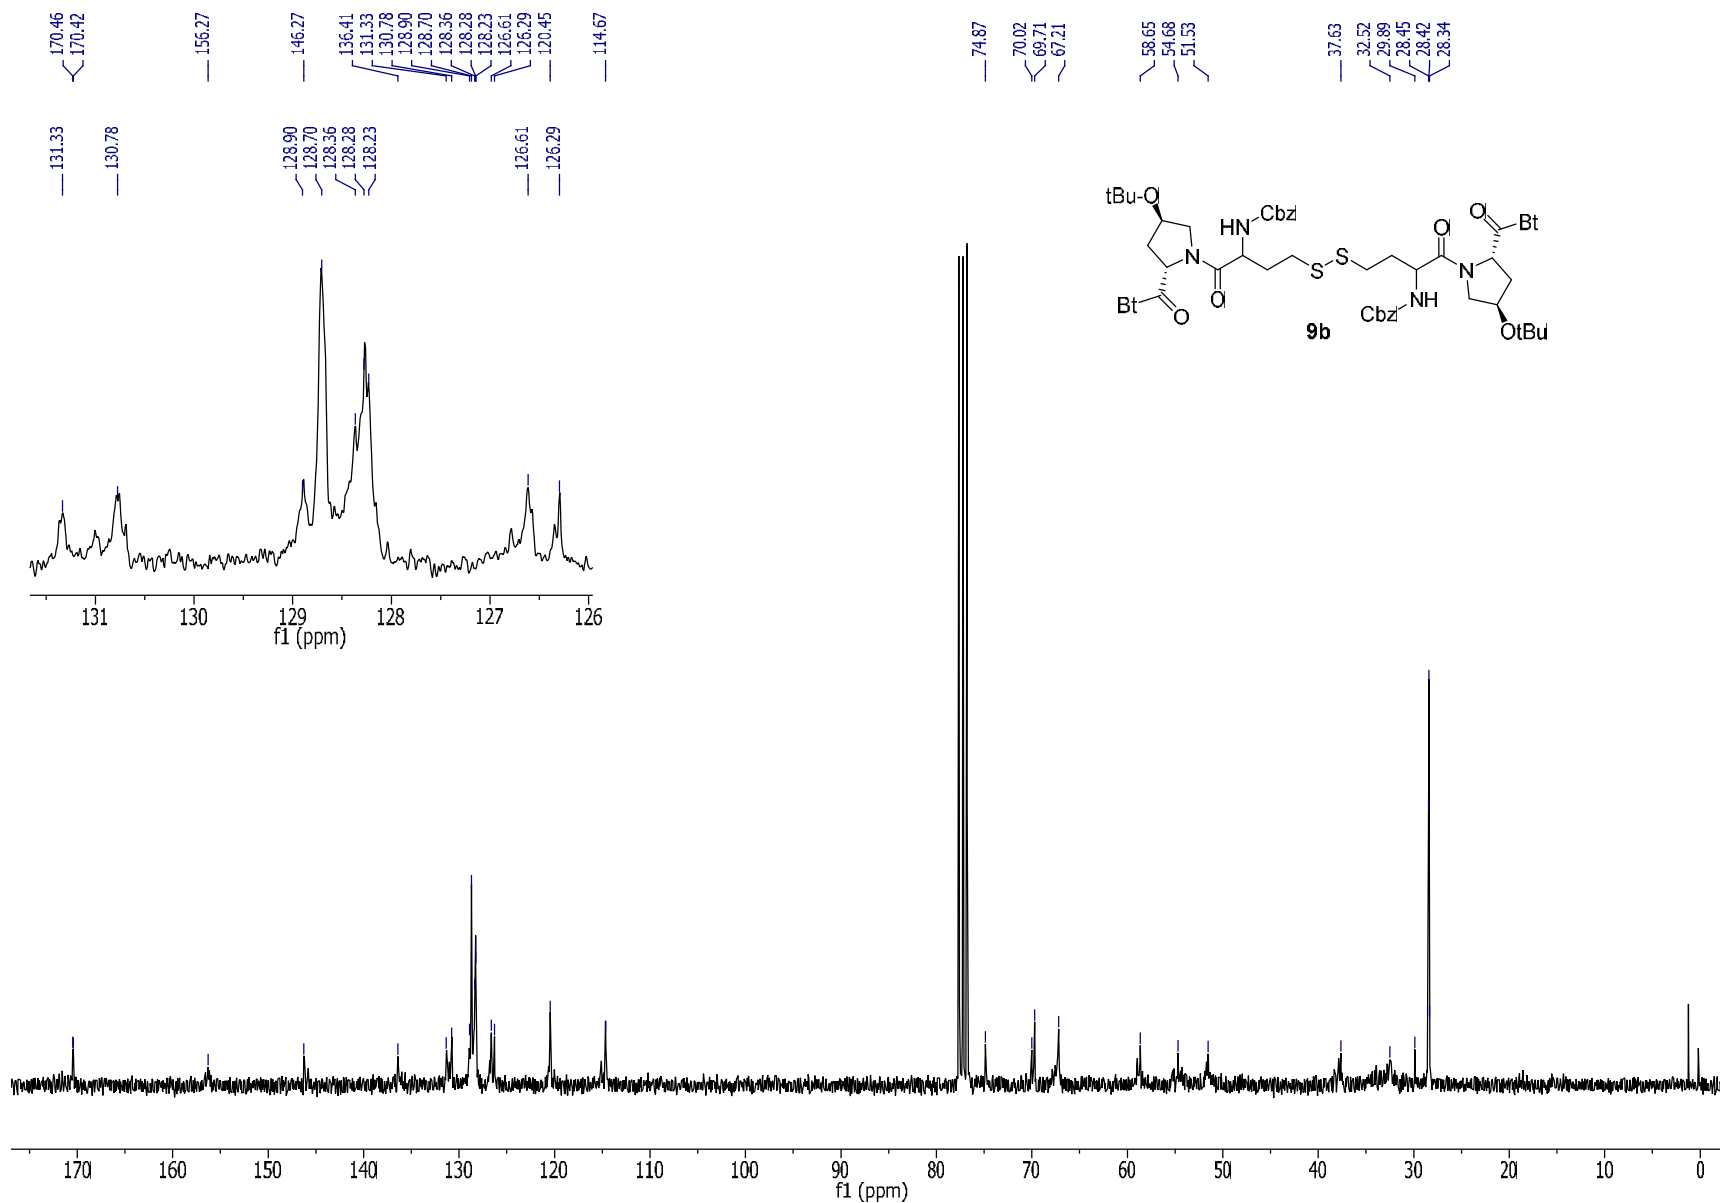

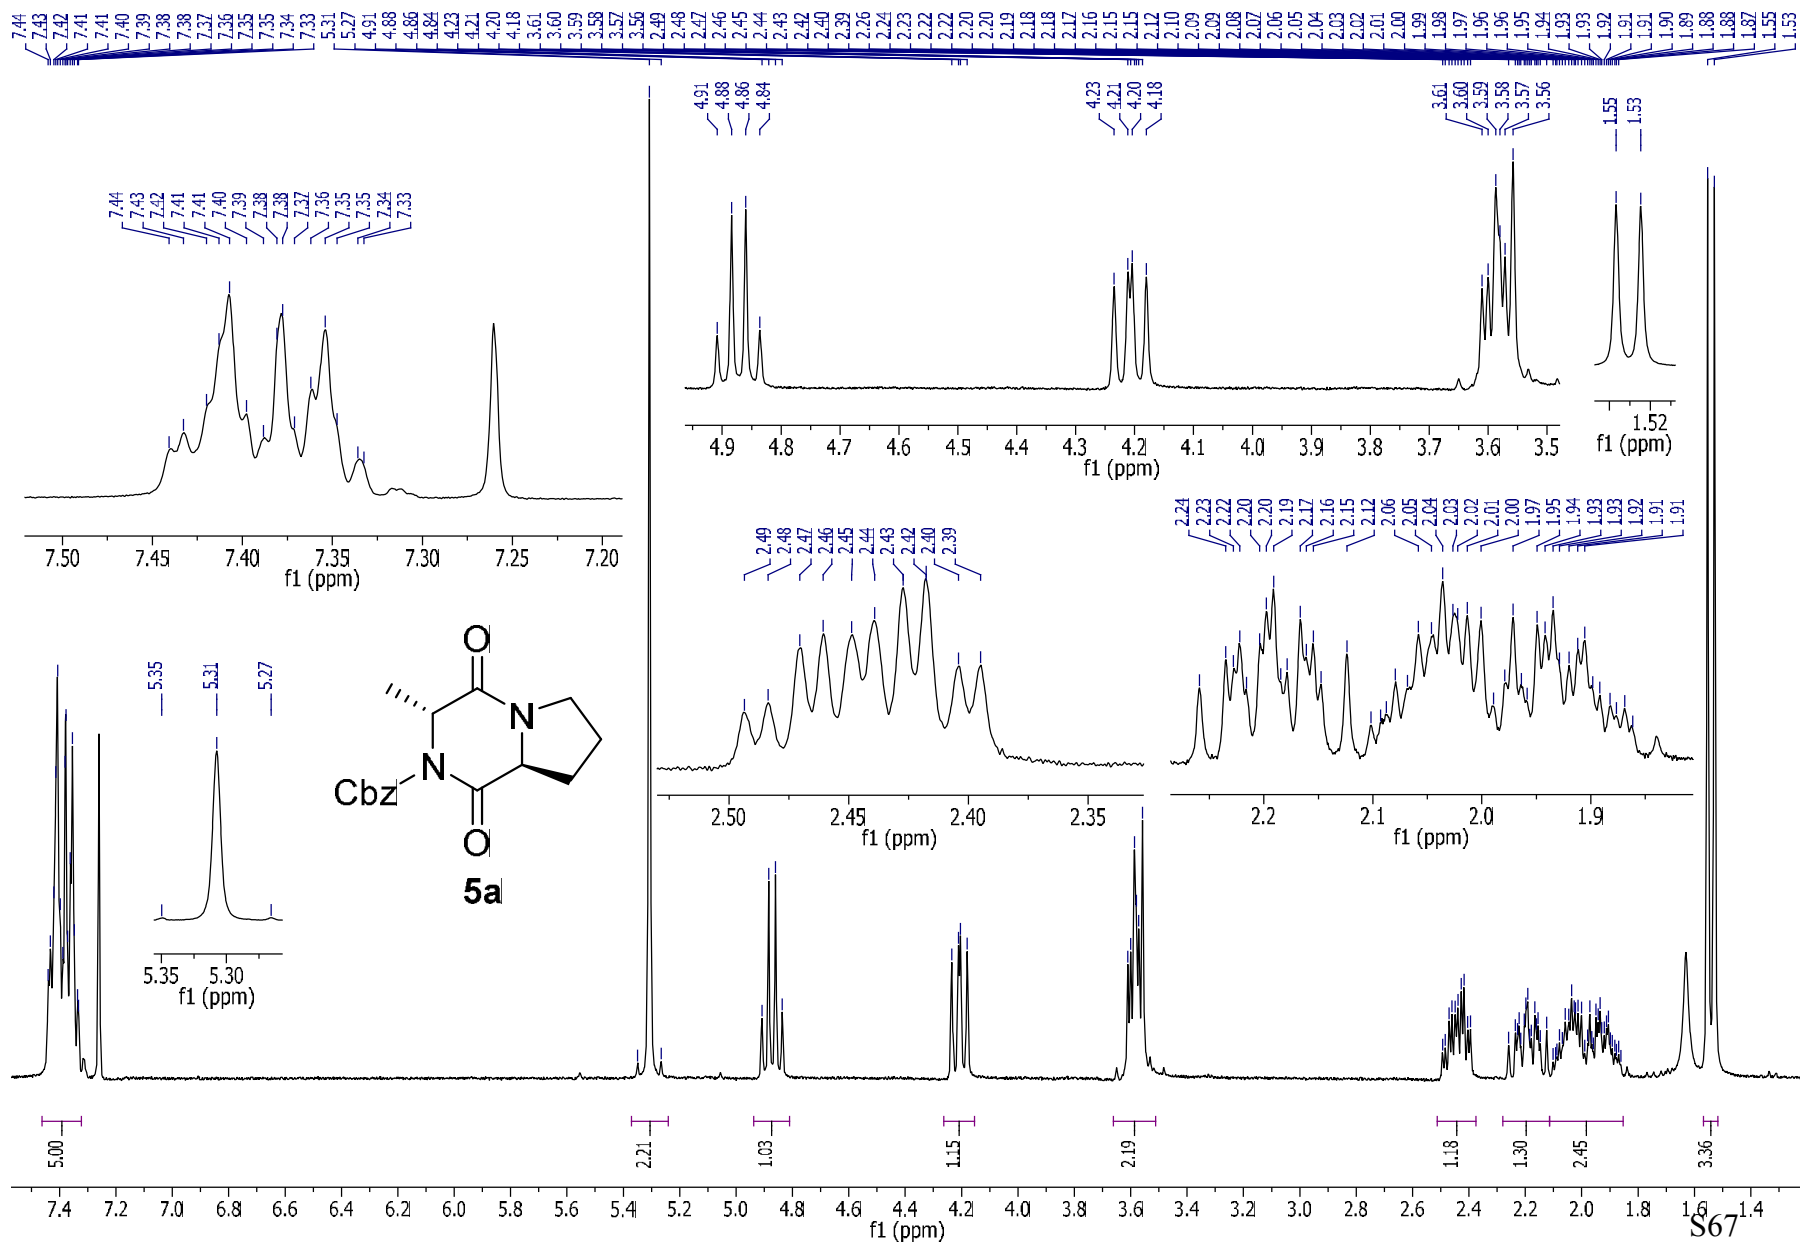

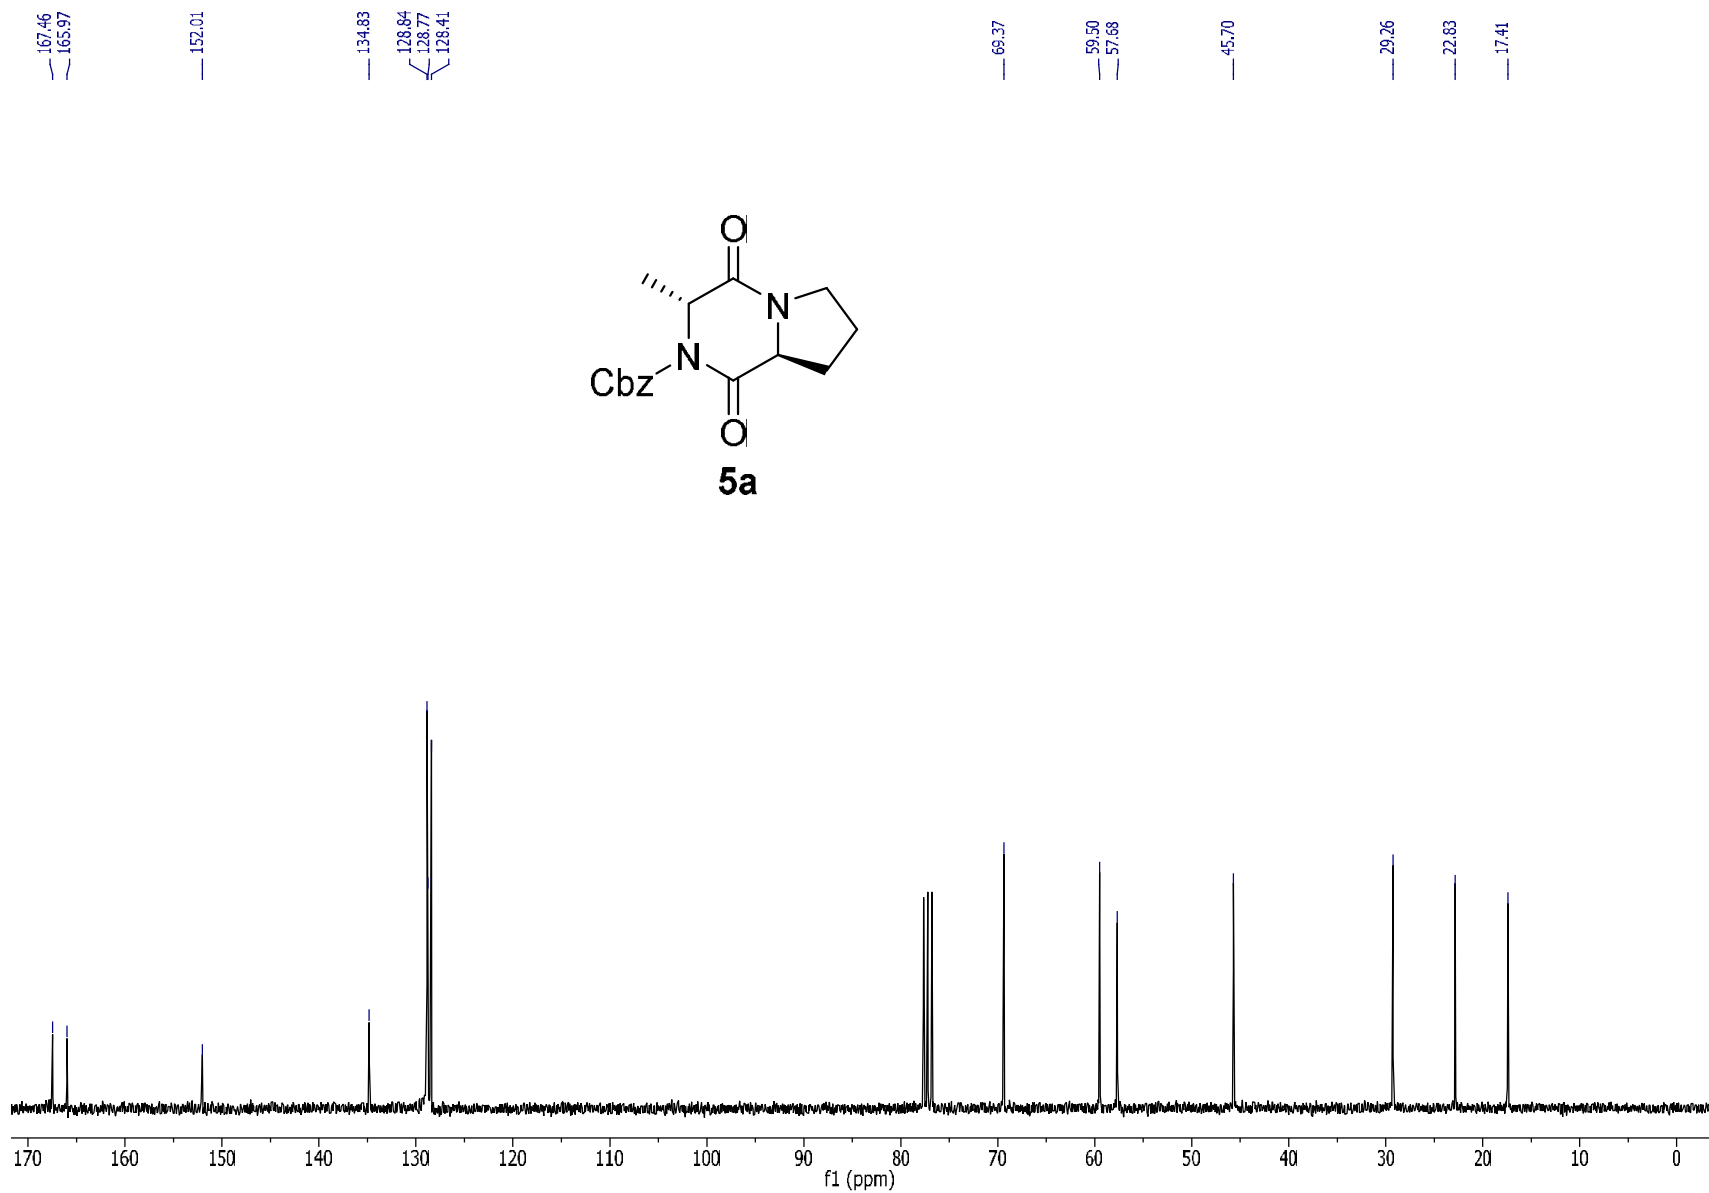

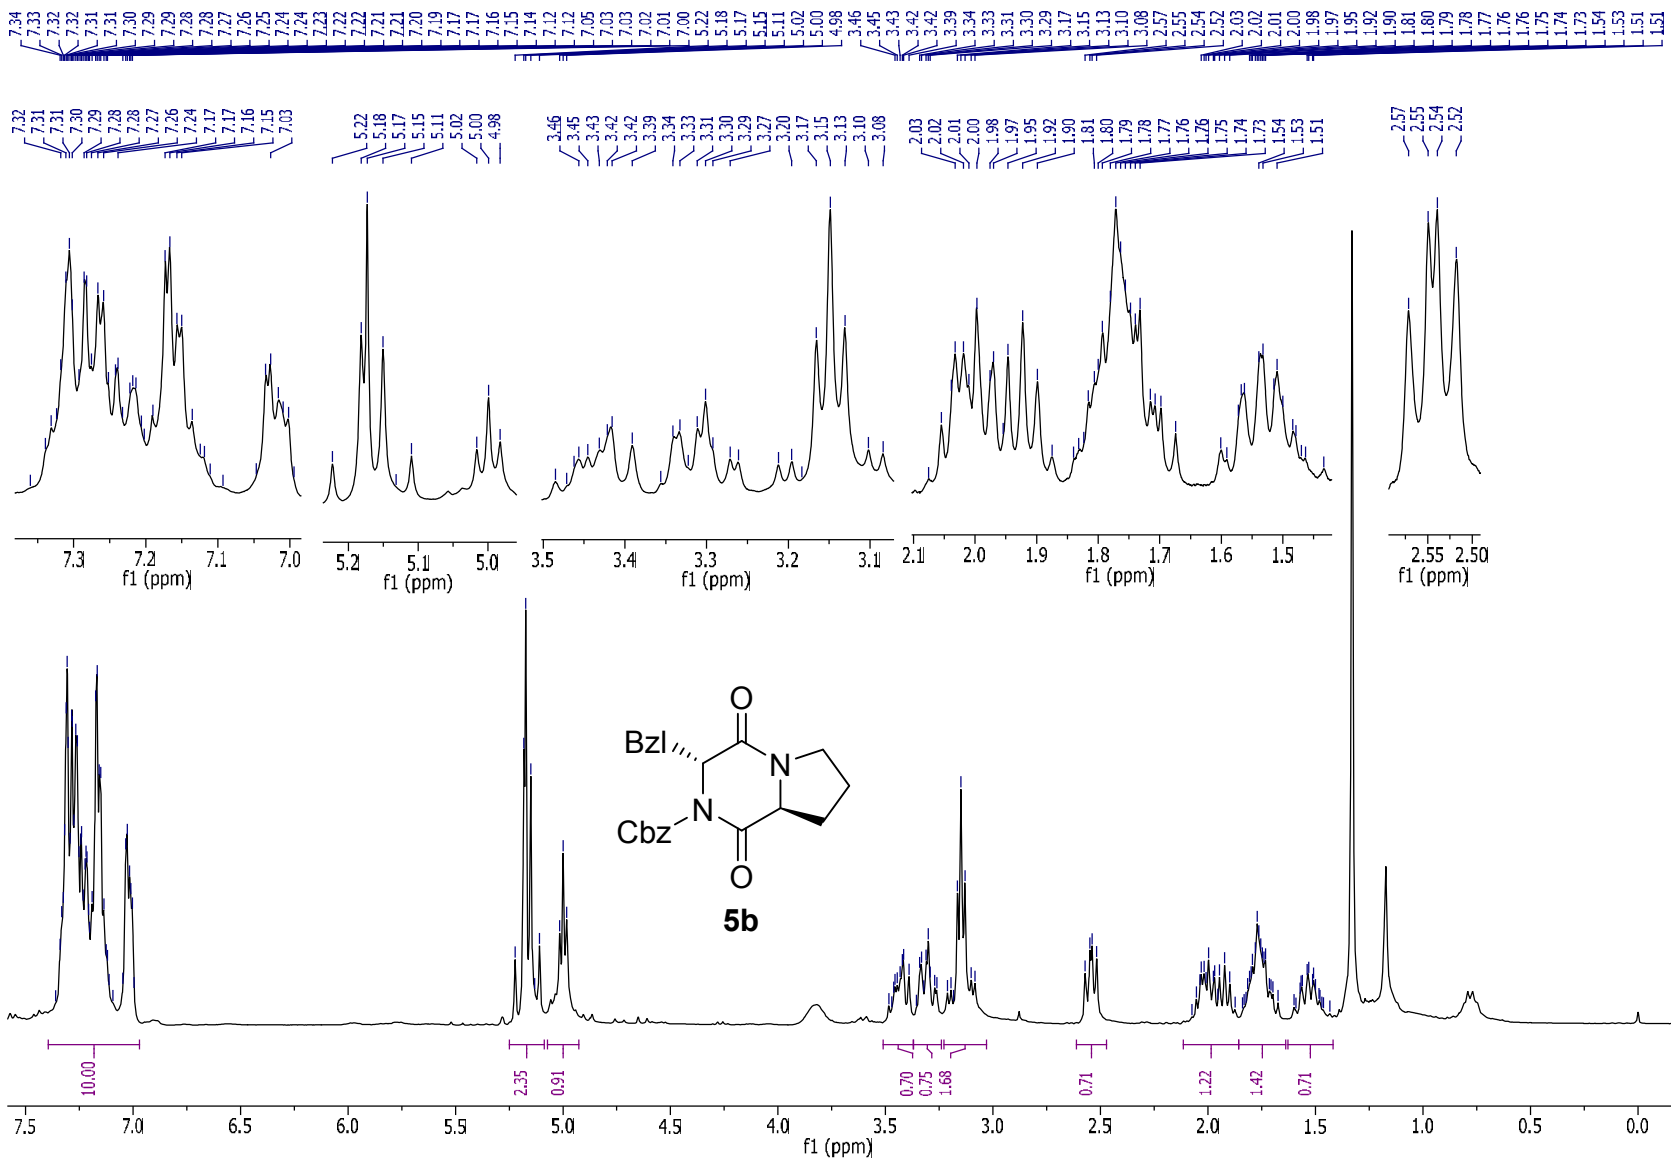

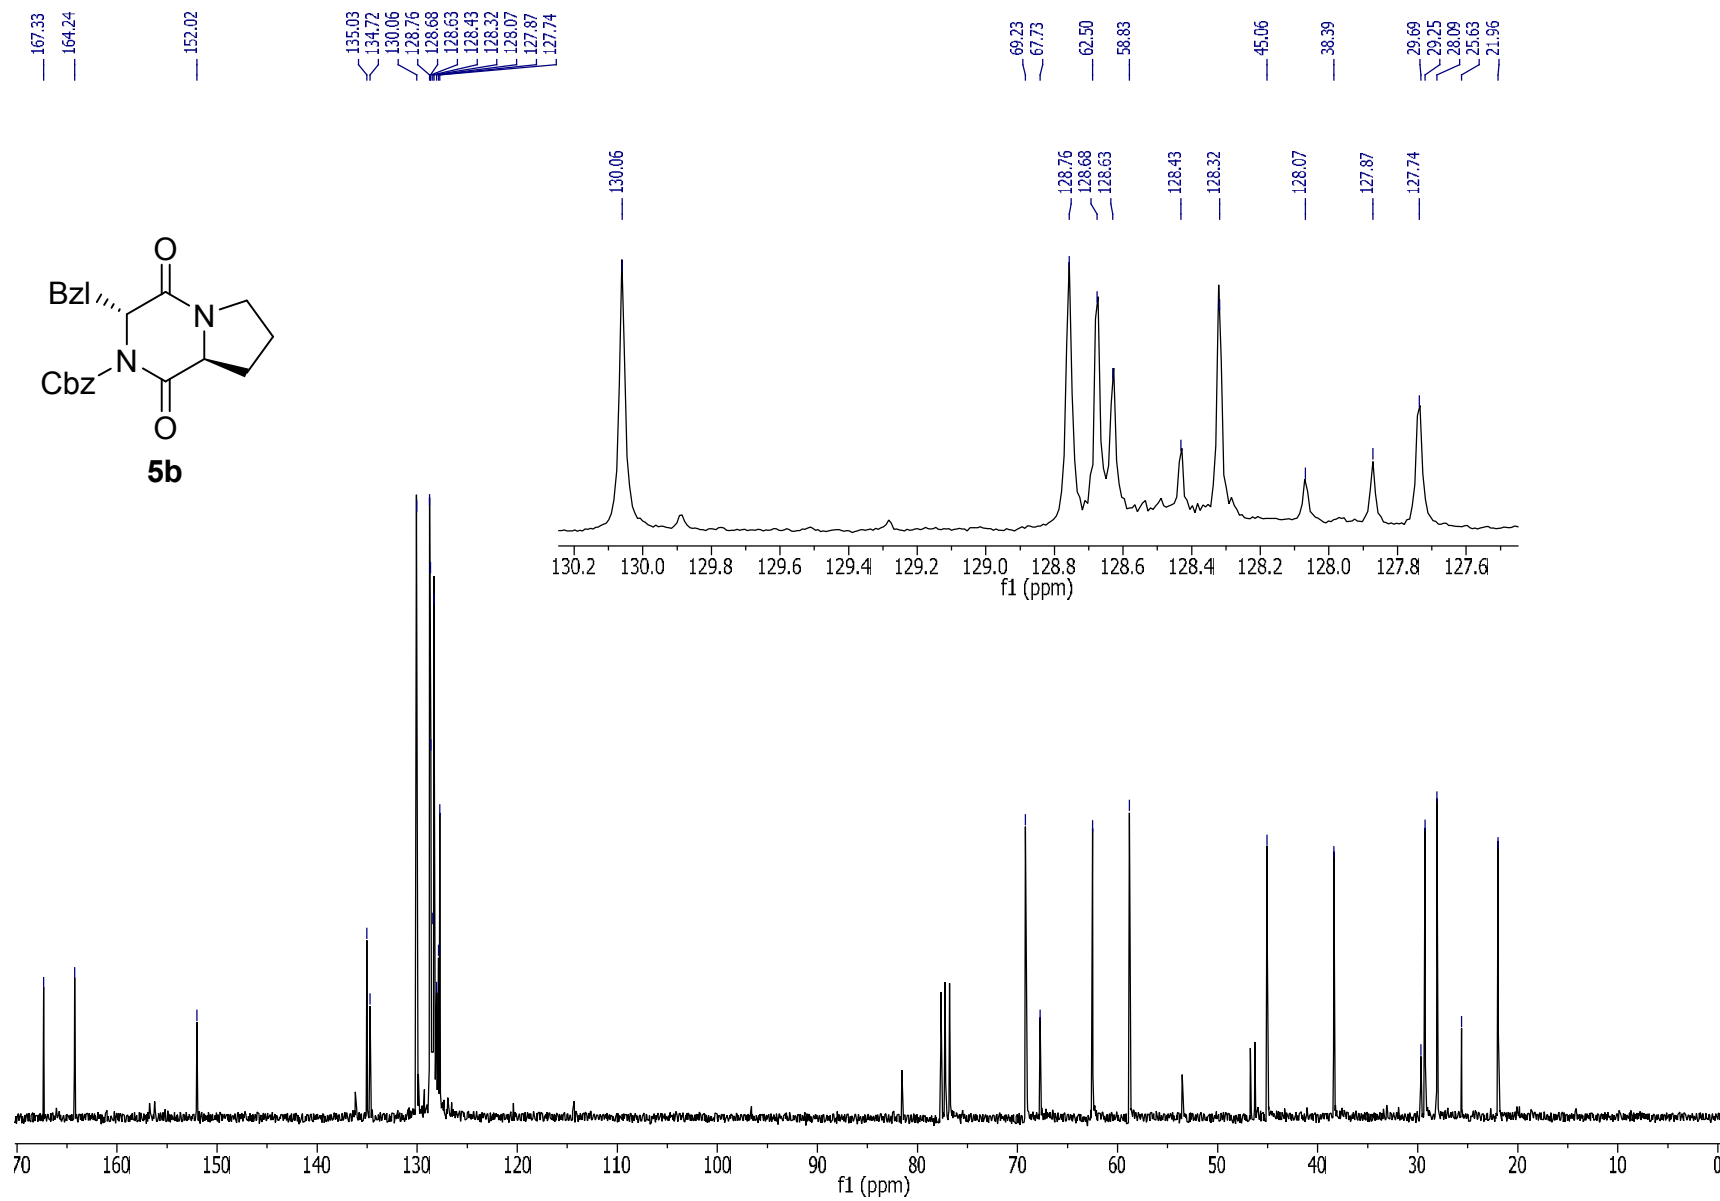

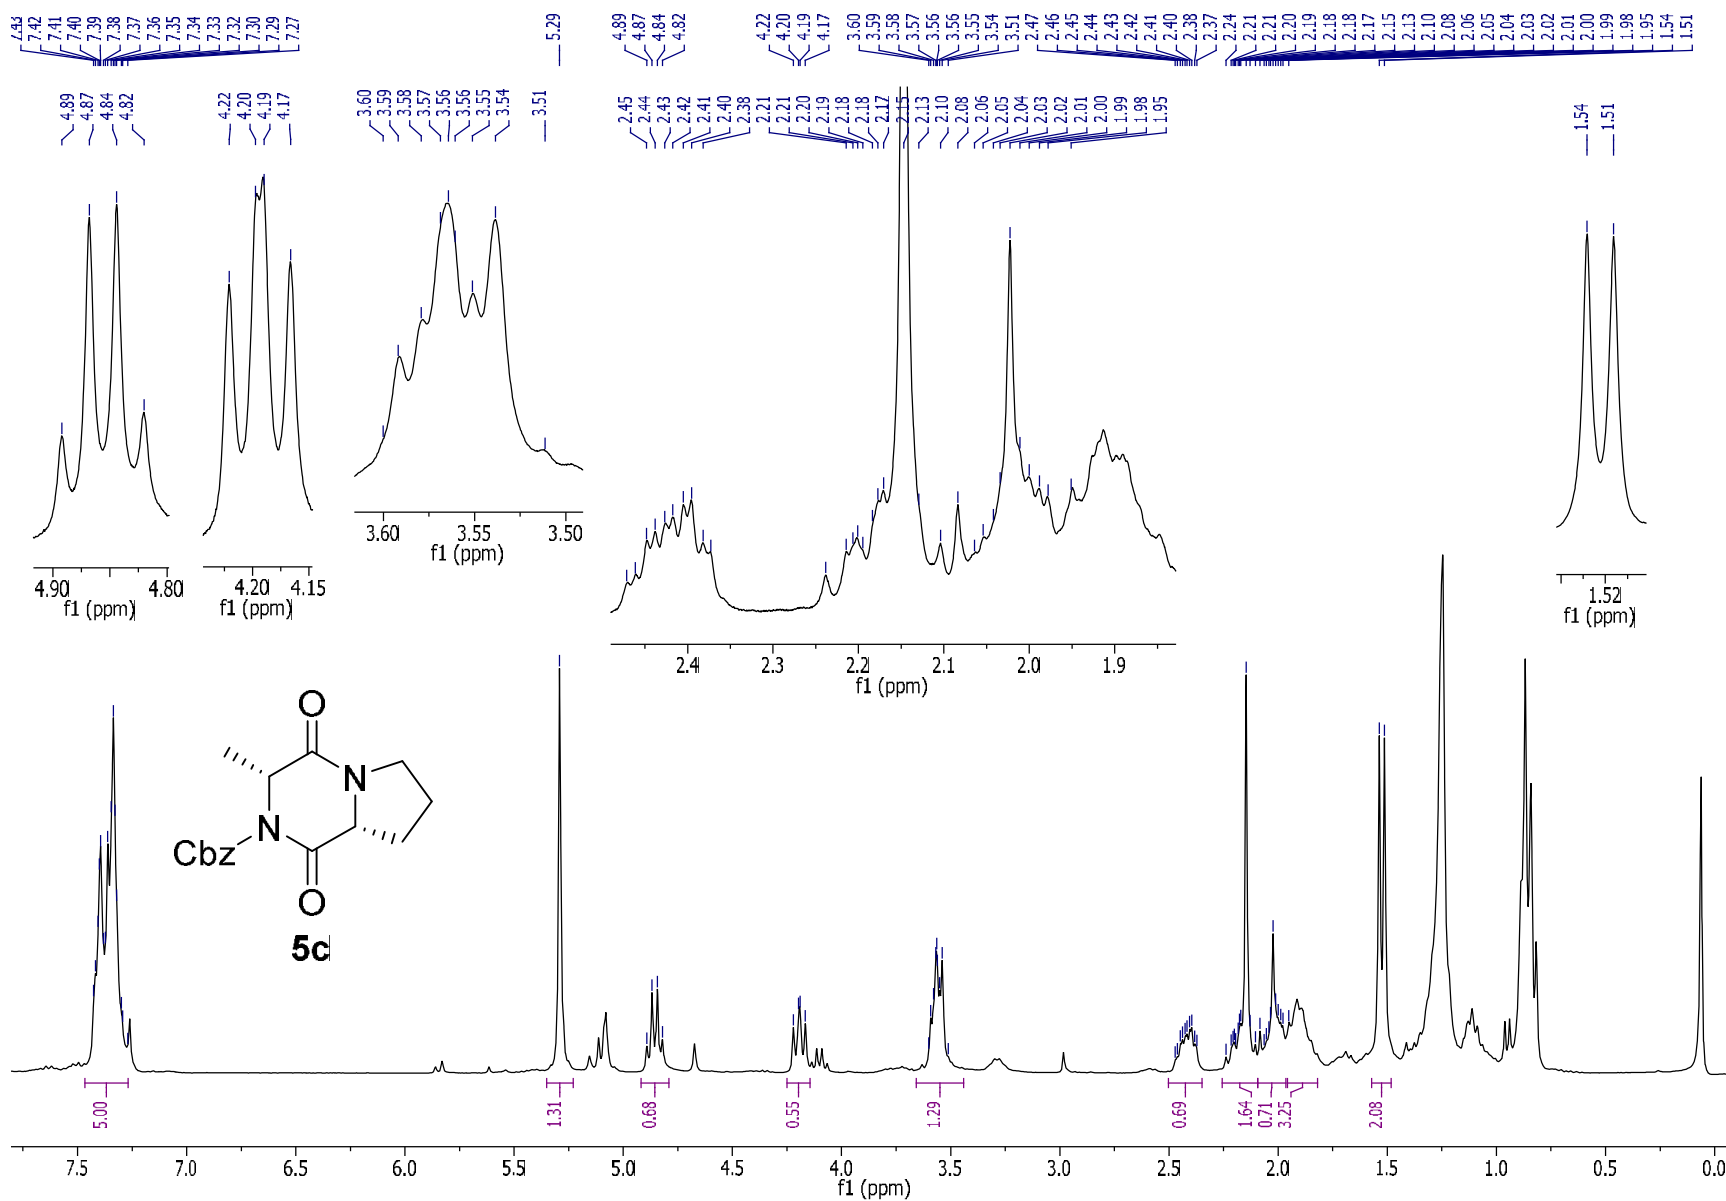

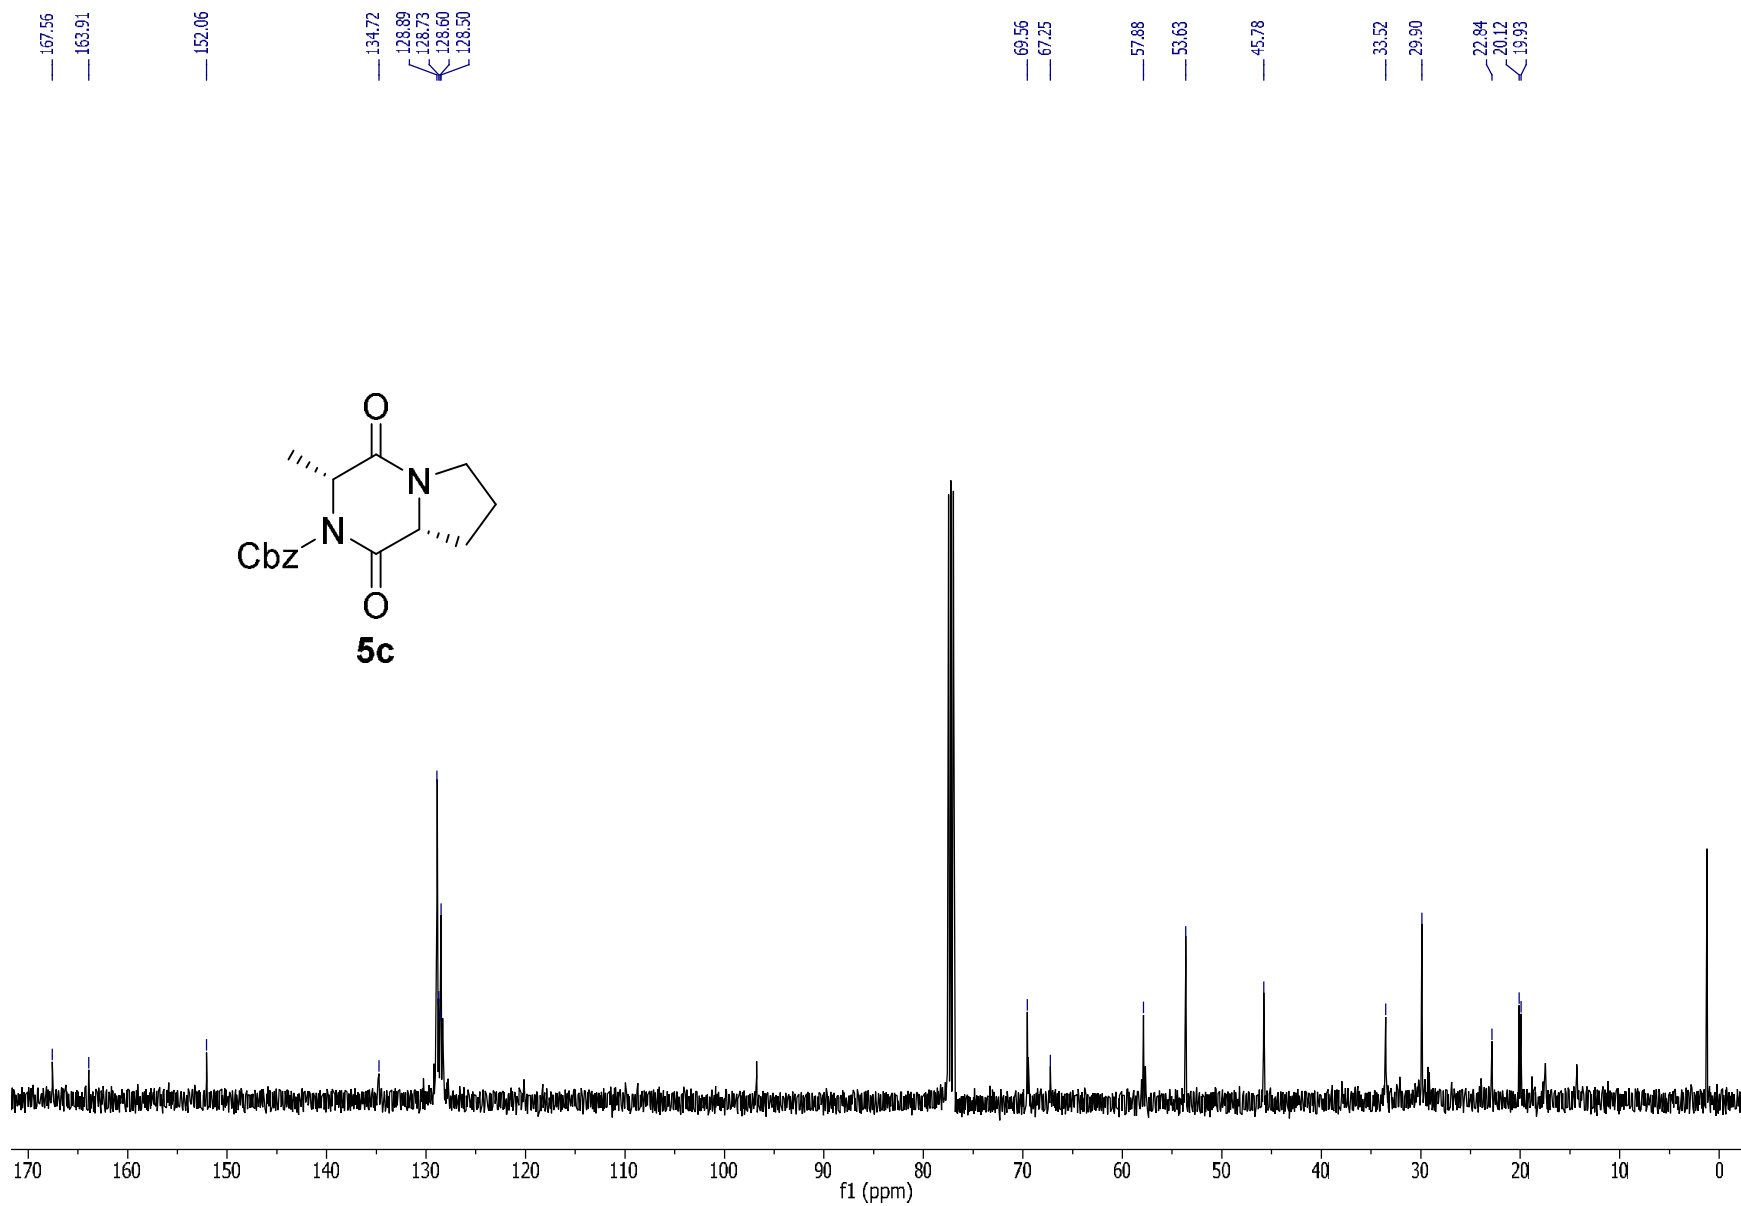



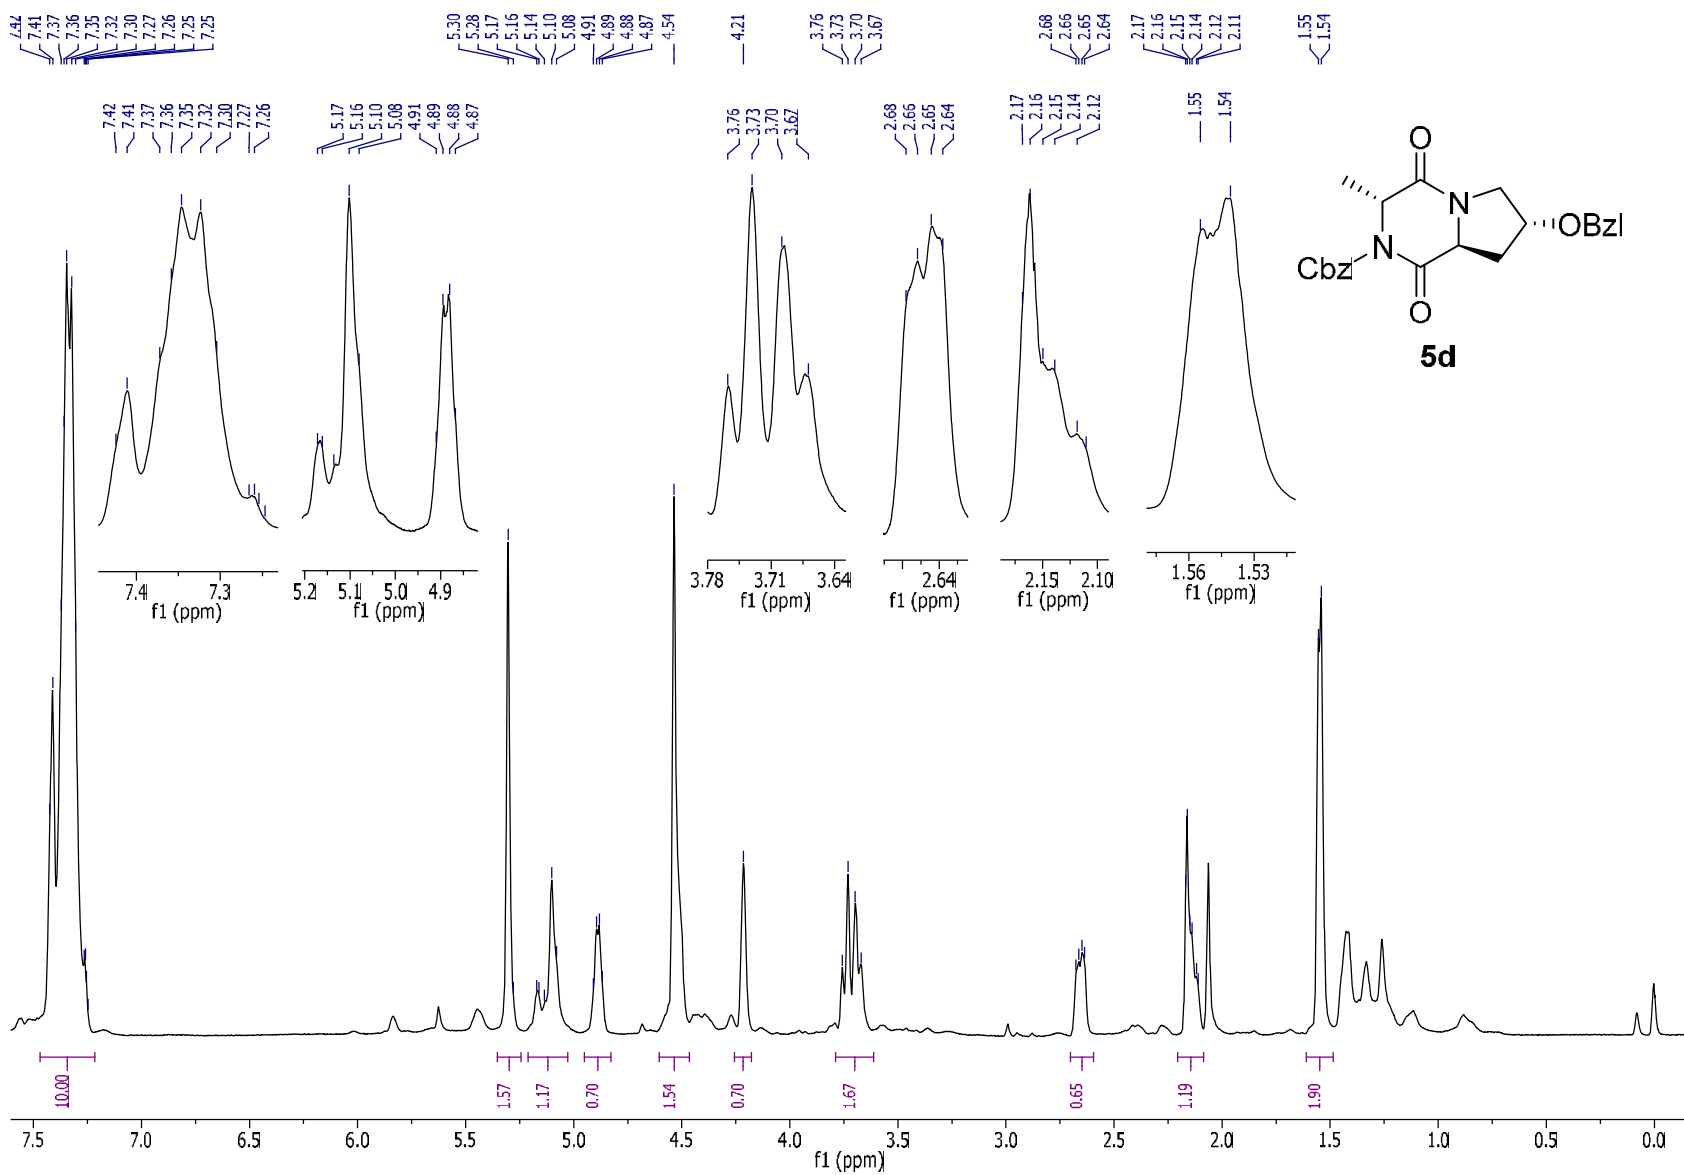

167.61  
166.07  
151.89  
137.30  
134.76  
128.83  
128.78  
128.75  
128.65  
128.41  
128.22  
127.89

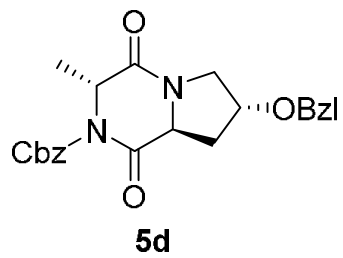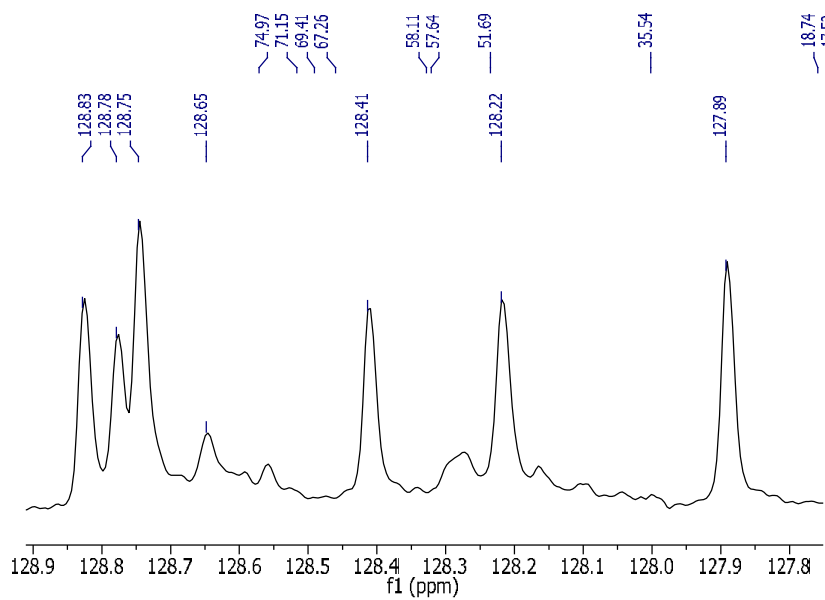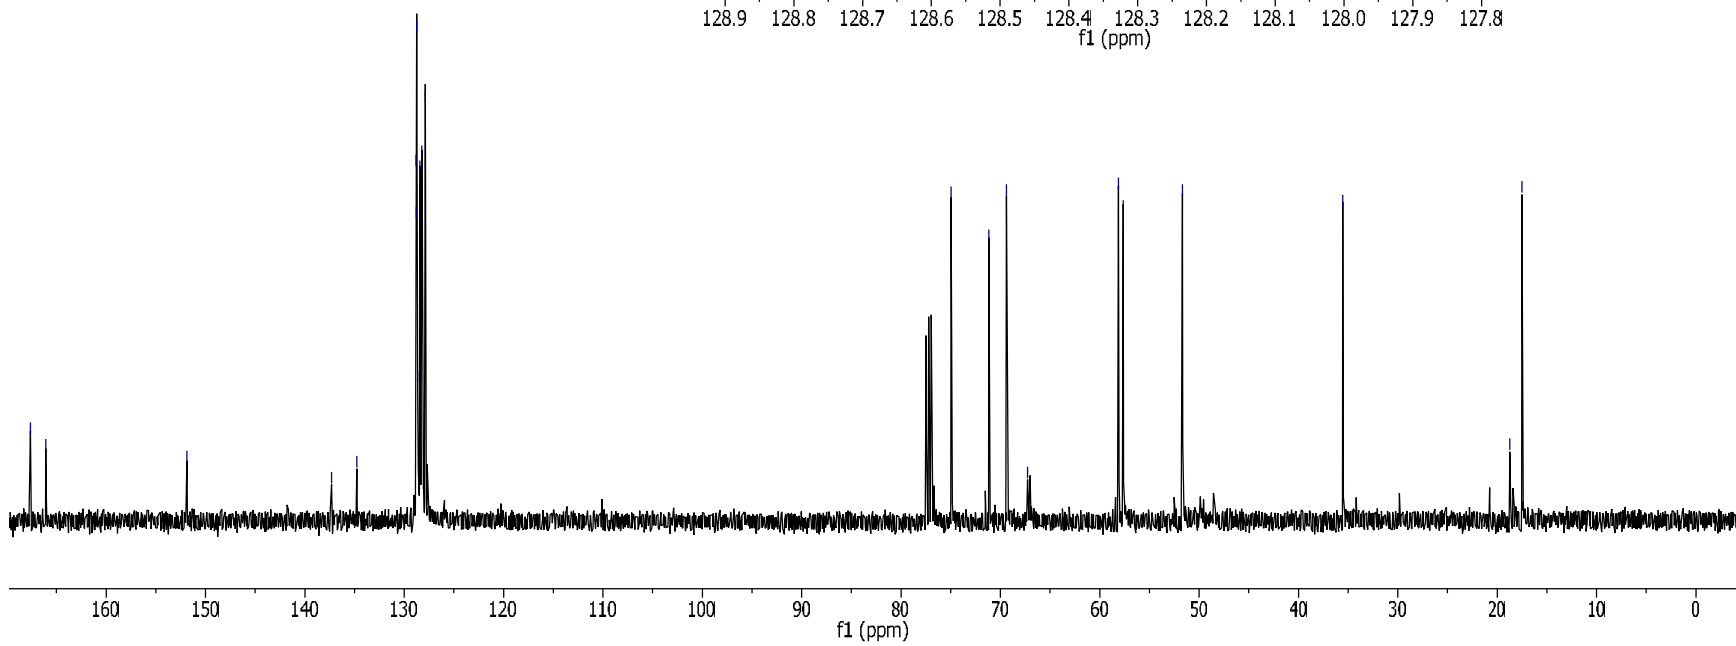

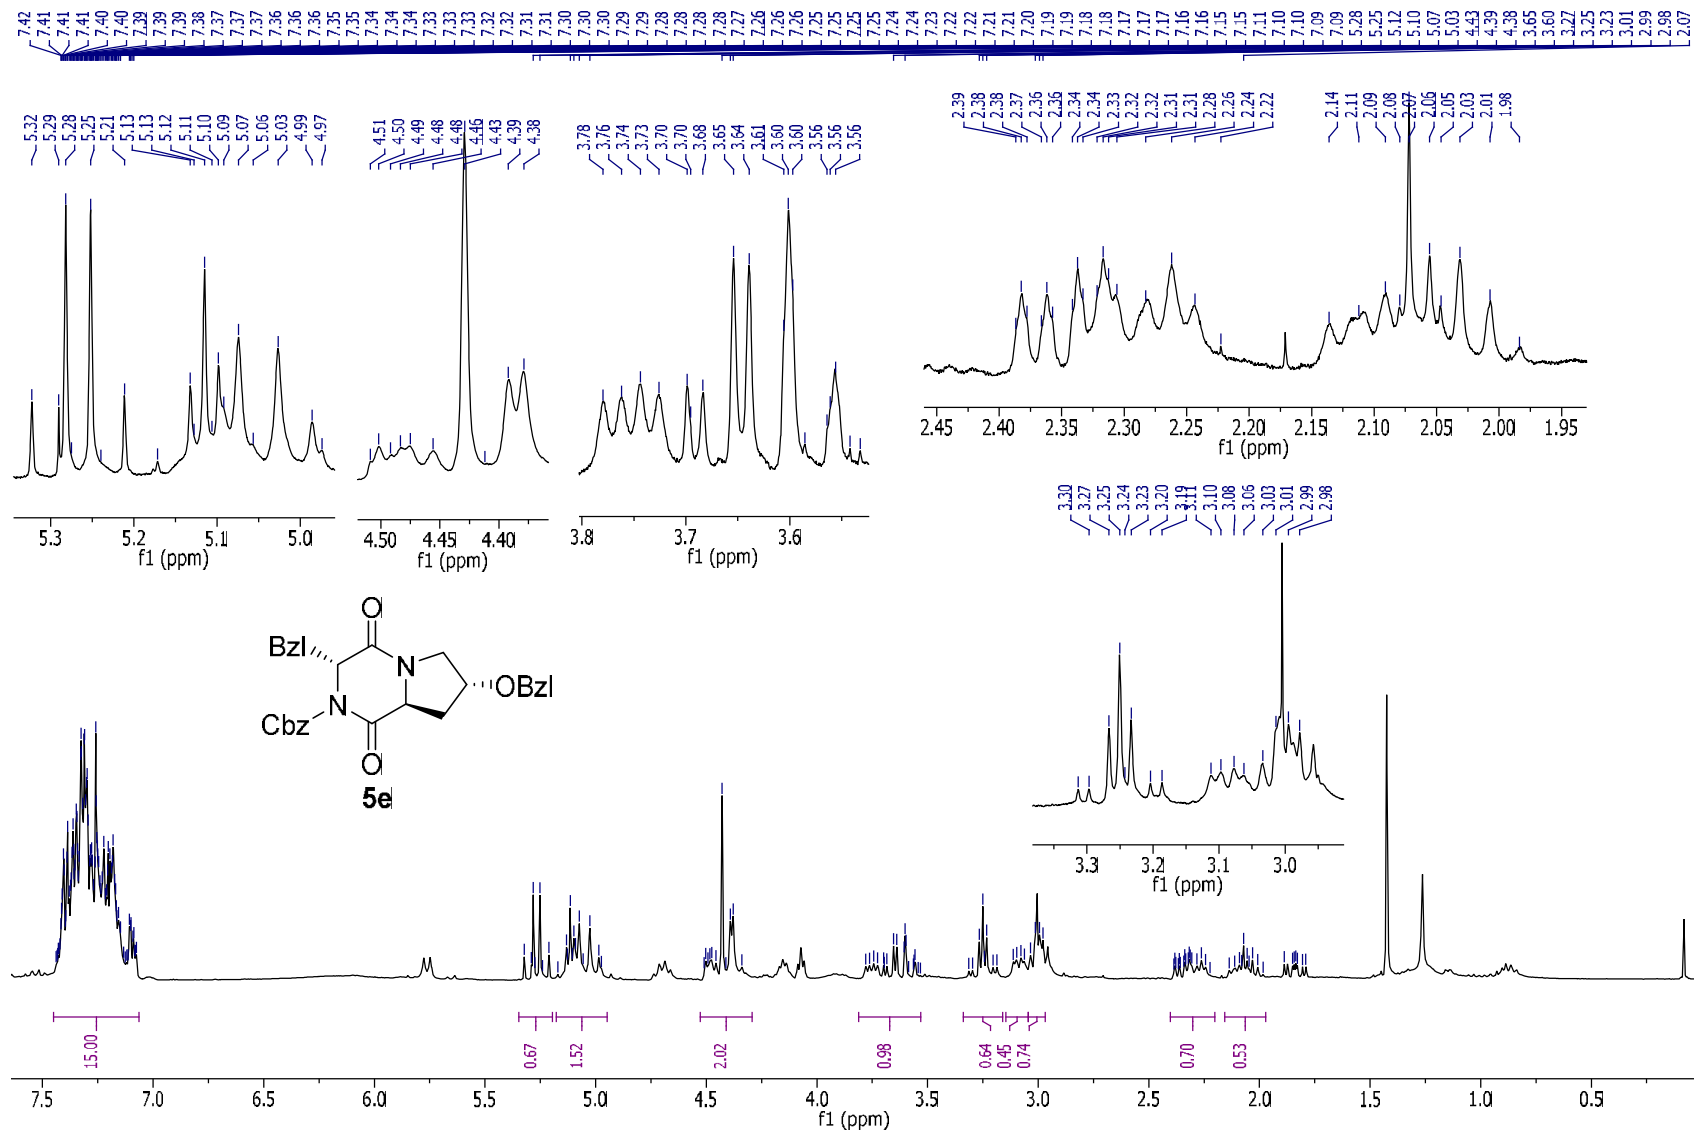

167.72  
164.62  
155.94  
152.15  
137.55  
135.85  
134.92  
130.07  
129.50  
129.13  
128.87  
128.78  
128.70  
128.68  
128.64  
128.28  
128.16  
128.12  
127.88  
127.77  
127.41

76.16  
74.49  
71.62  
70.78  
69.48  
67.17  
62.72  
58.52  
57.56  
51.72  
39.07  
38.57  
35.53  
28.27

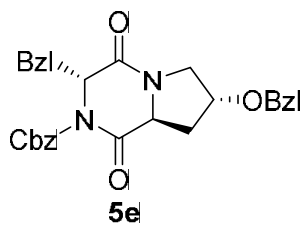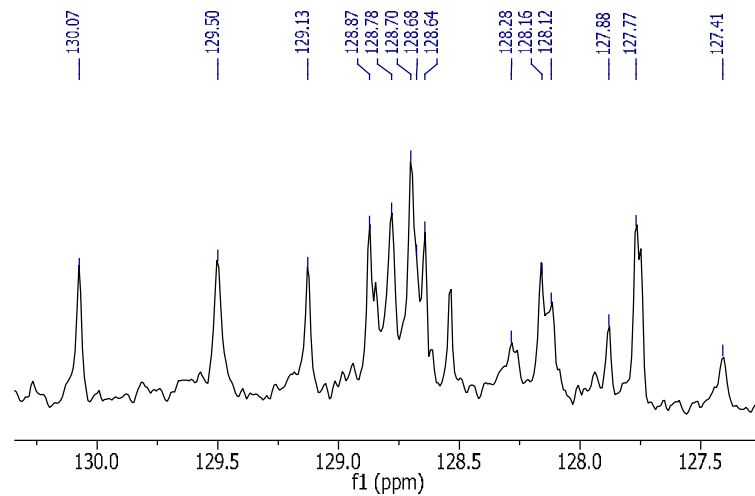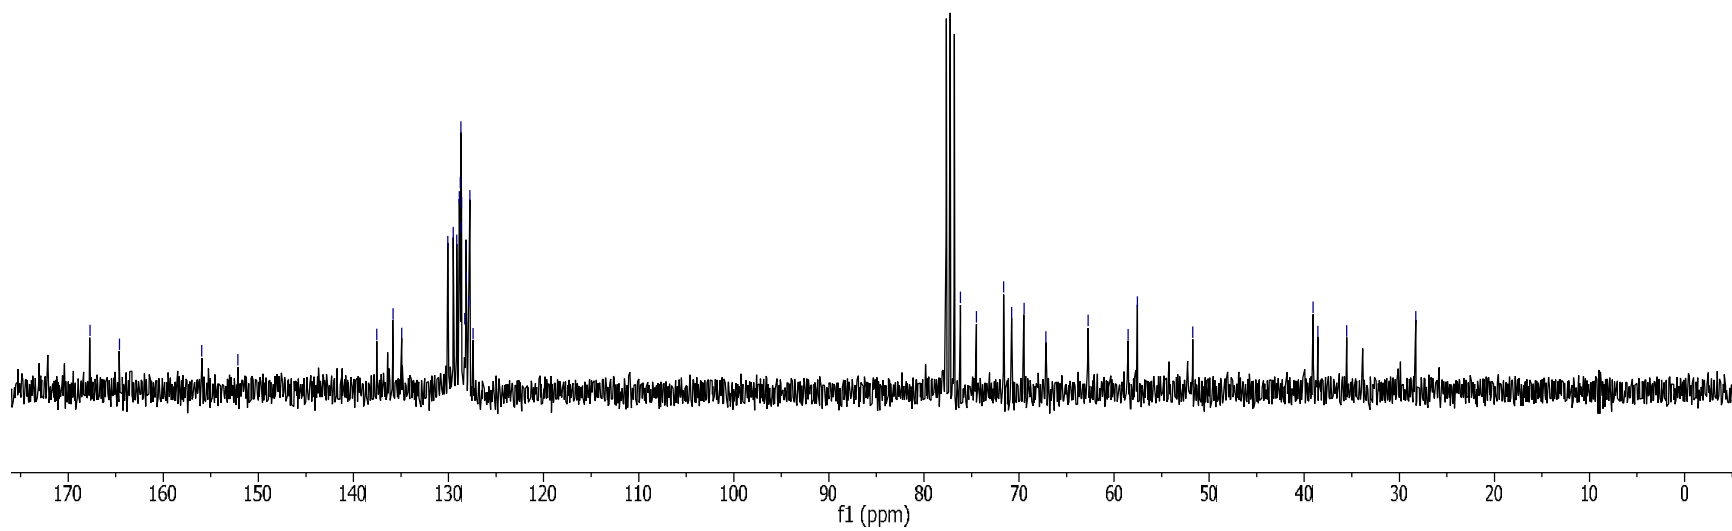

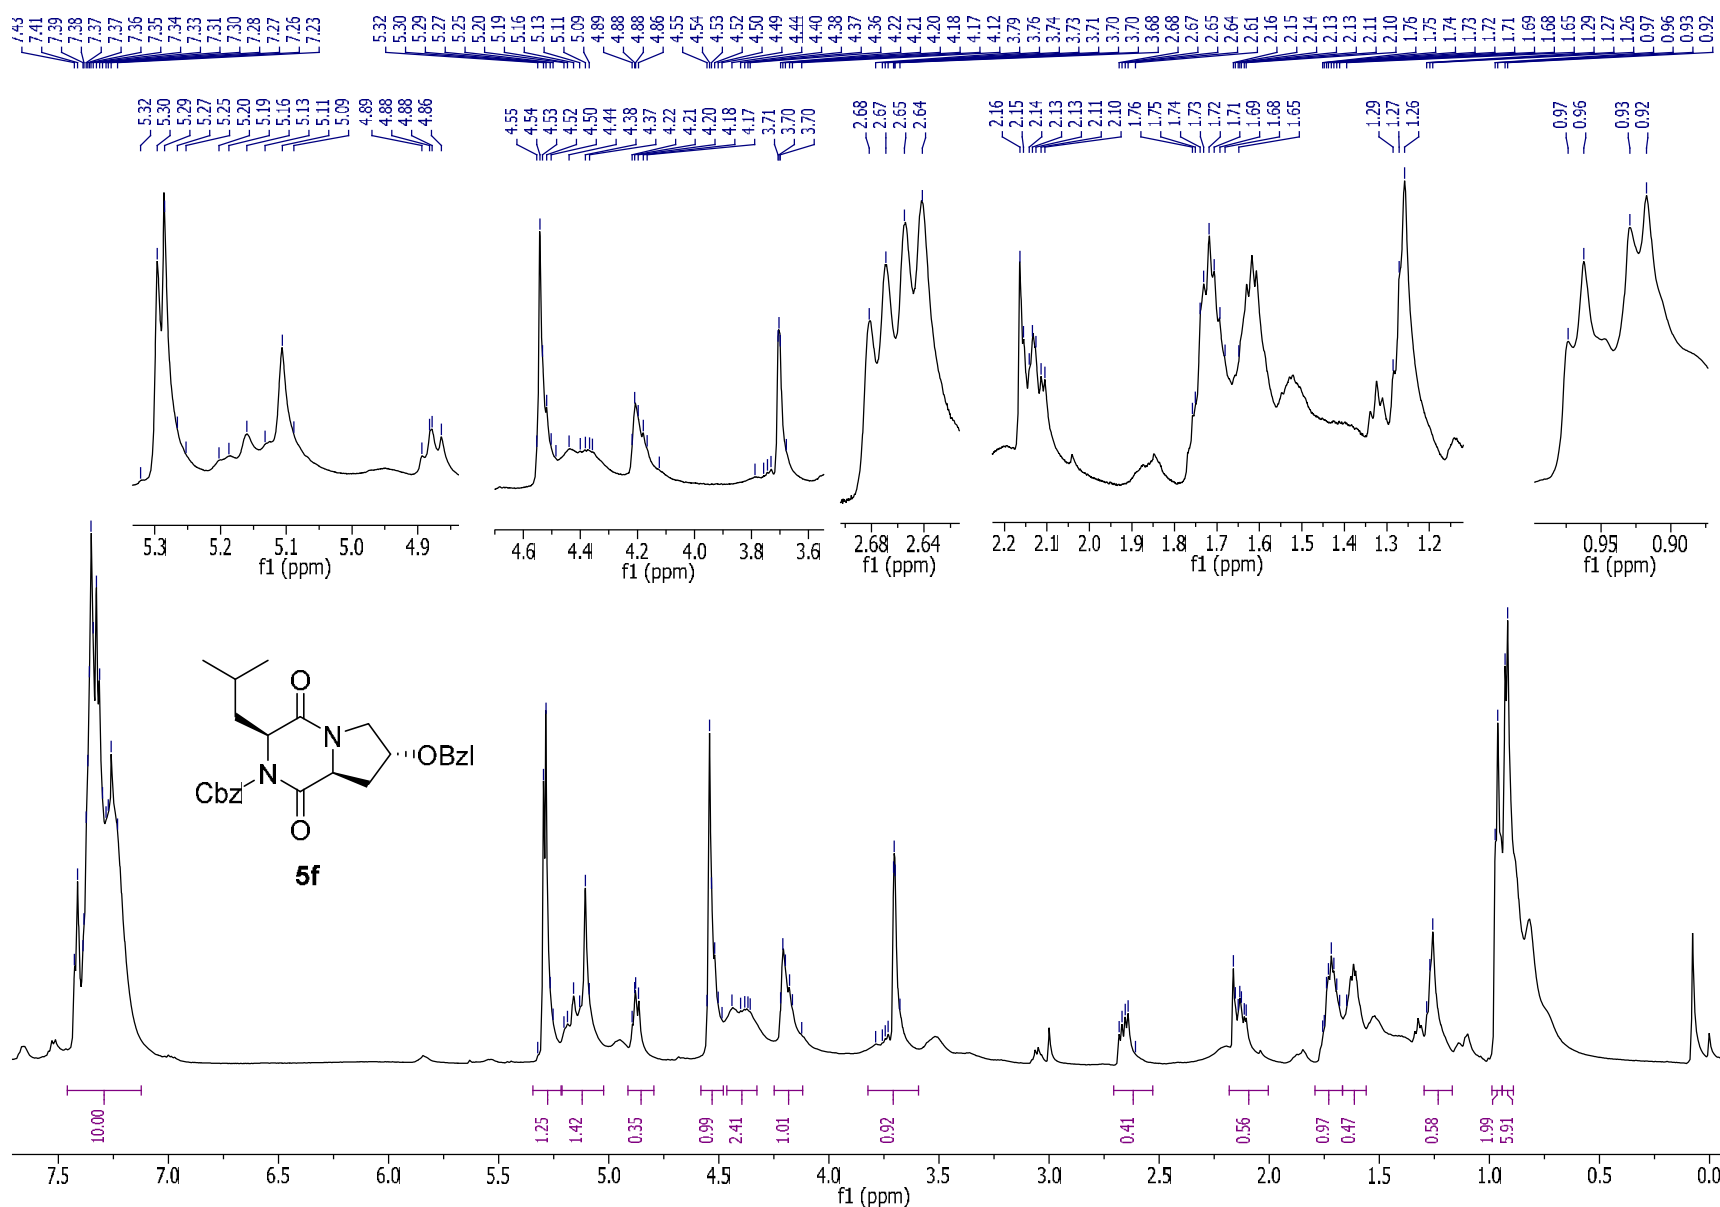

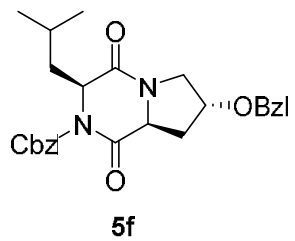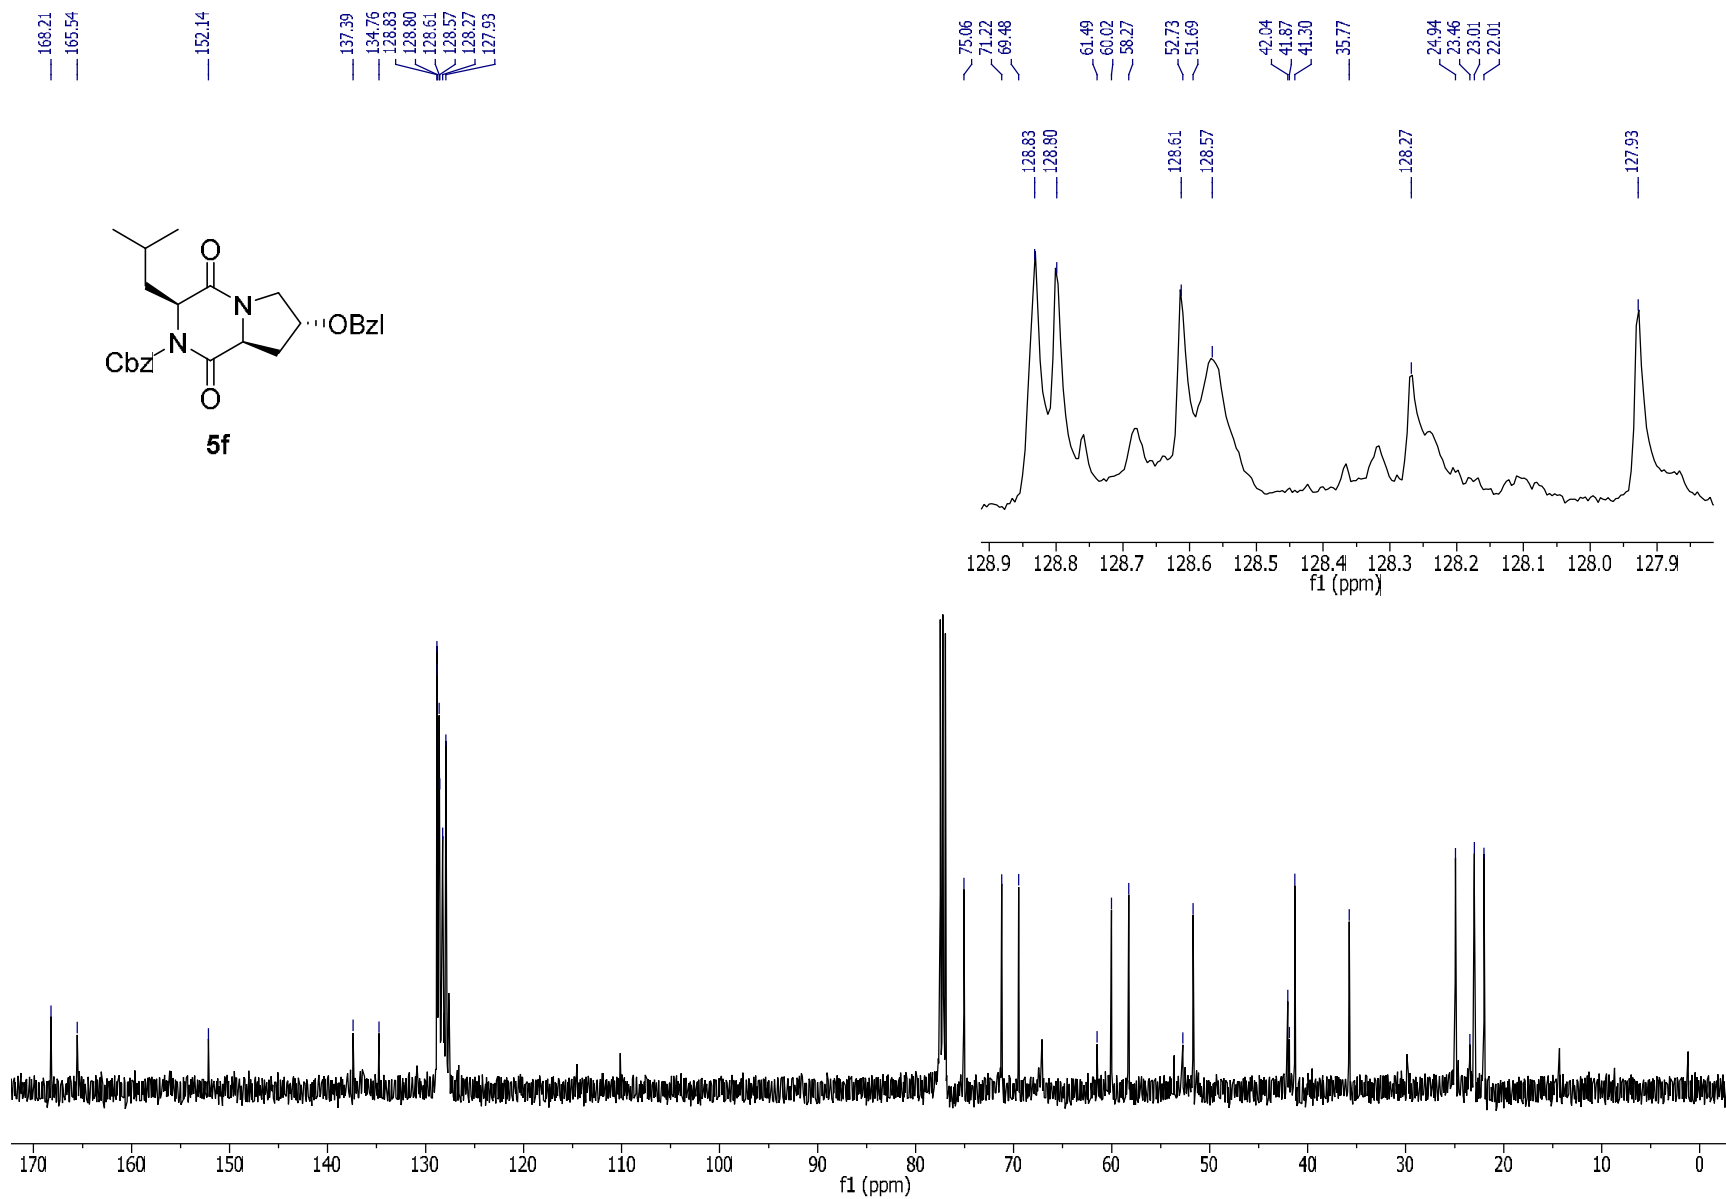

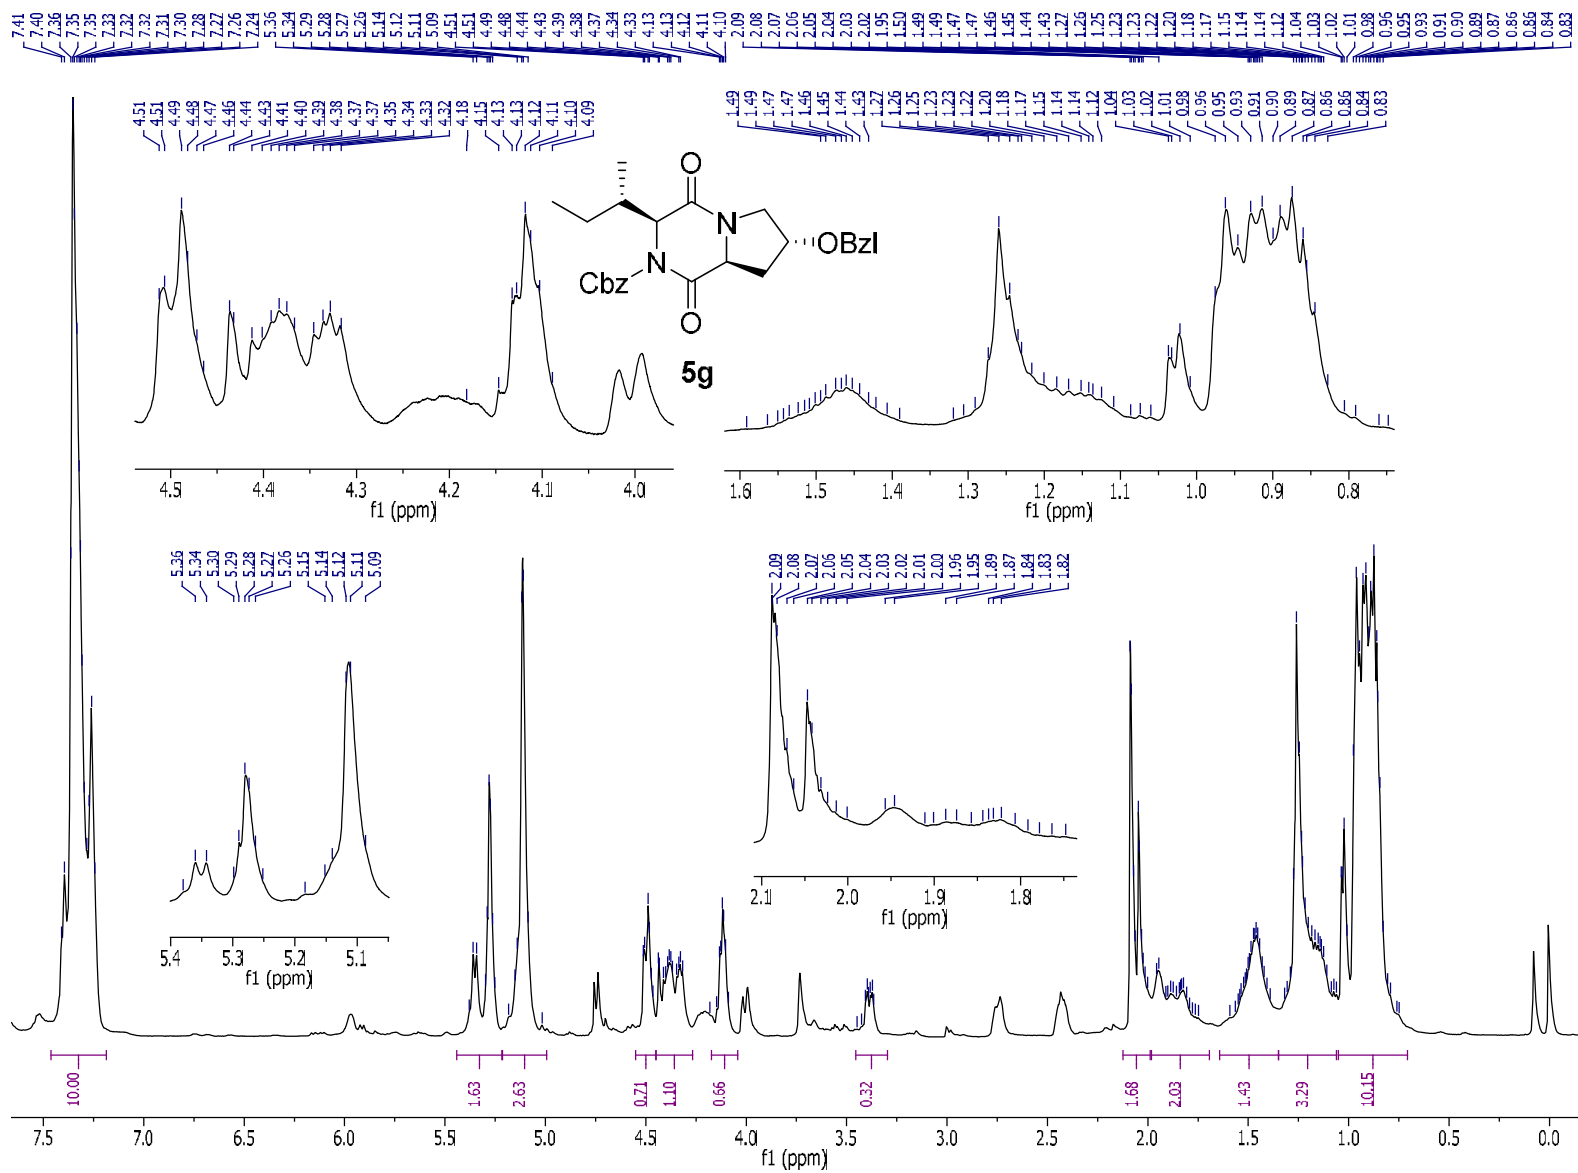

176.68  
176.20  
167.73  
166.27  
156.39  
152.64

137.45  
136.34  
134.86  
128.73  
128.65  
128.57  
128.34  
128.31  
128.23  
127.95  
127.86

74.31  
70.84  
69.39  
67.22  
65.43

60.63  
58.20  
57.16

51.50

37.96  
37.63  
34.38

29.83  
26.35  
25.74  
24.98  
20.88

15.59  
14.49  
11.87  
11.29

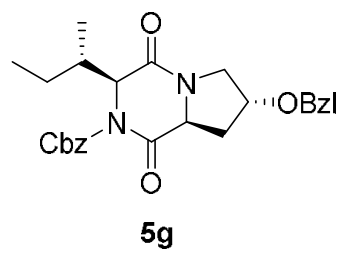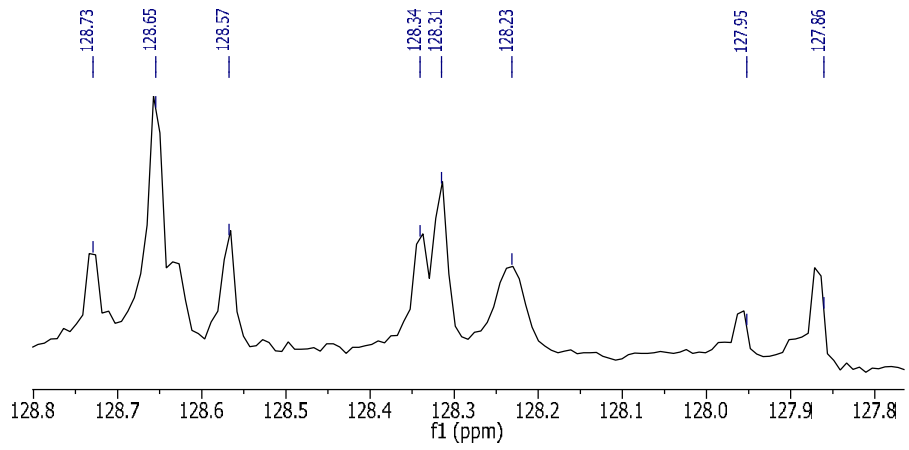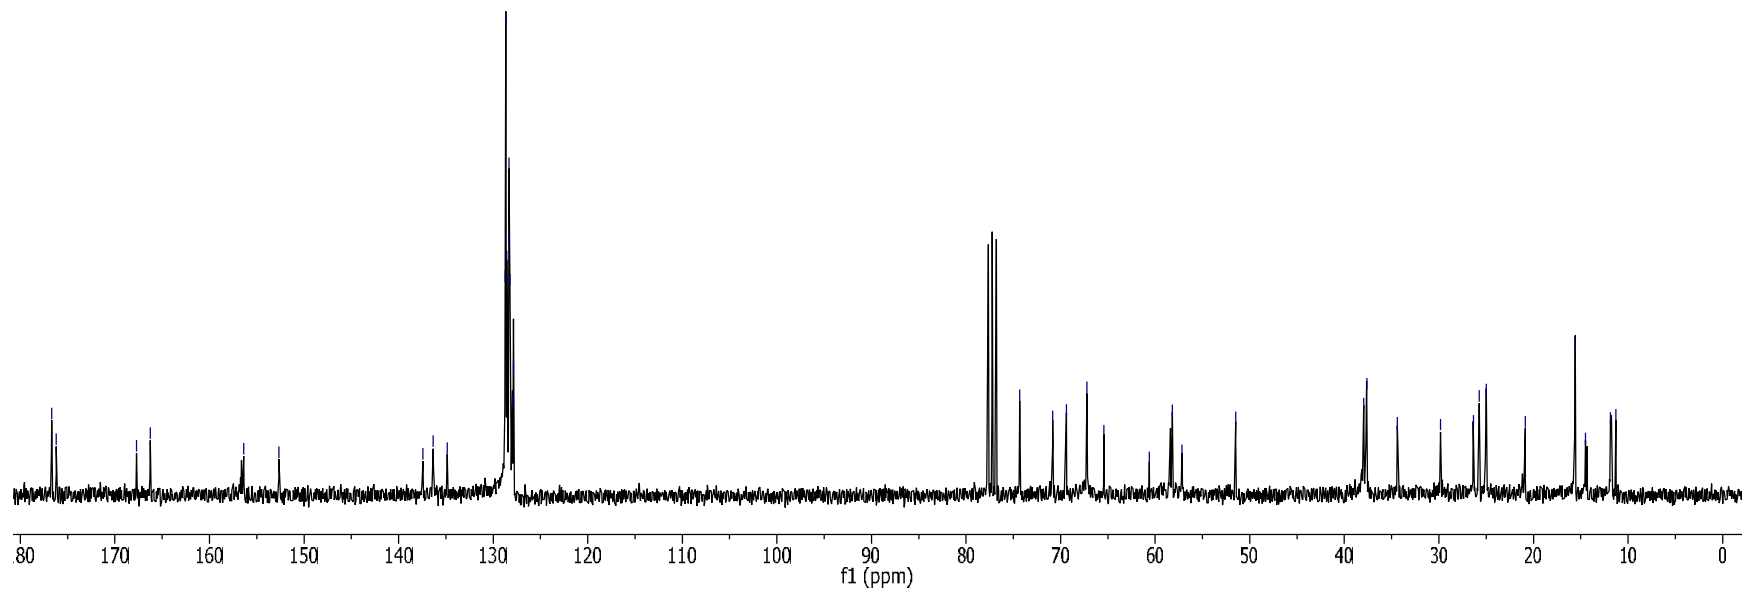



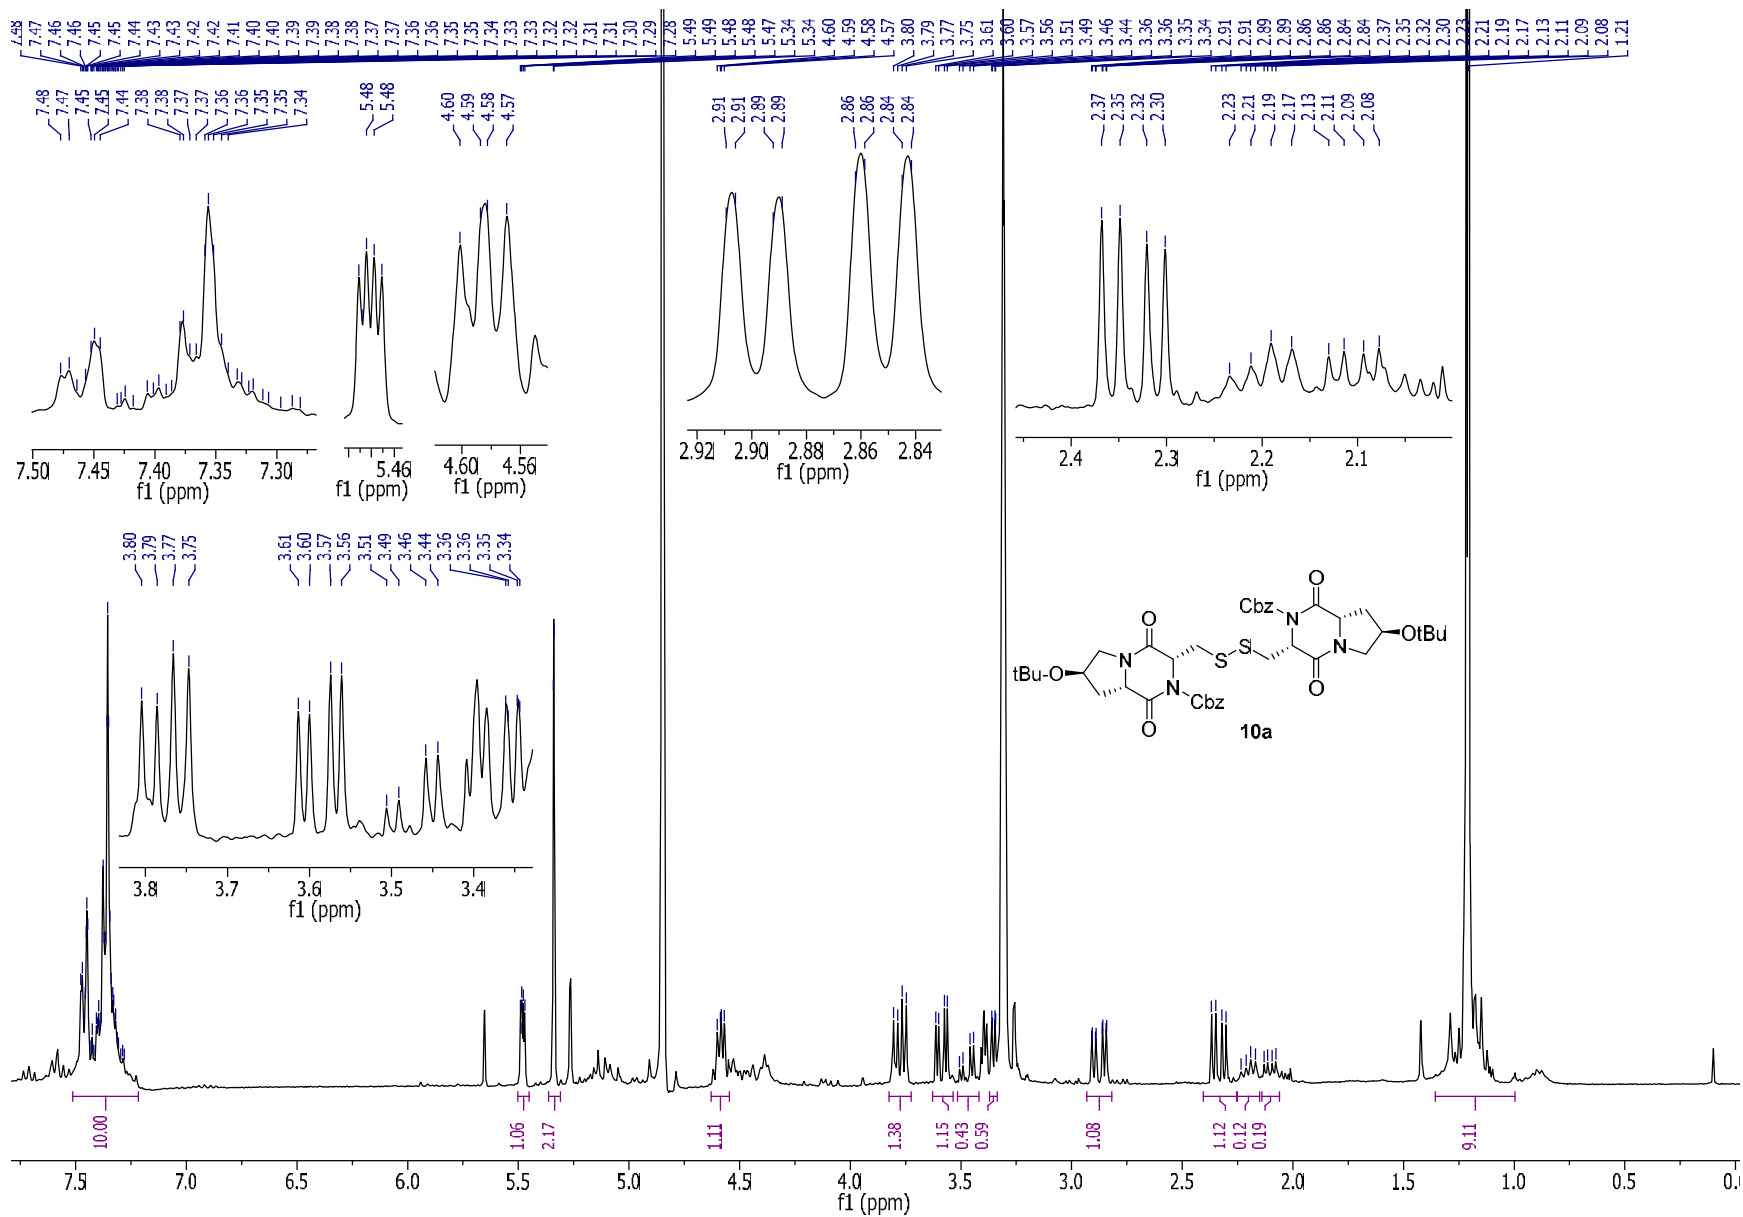

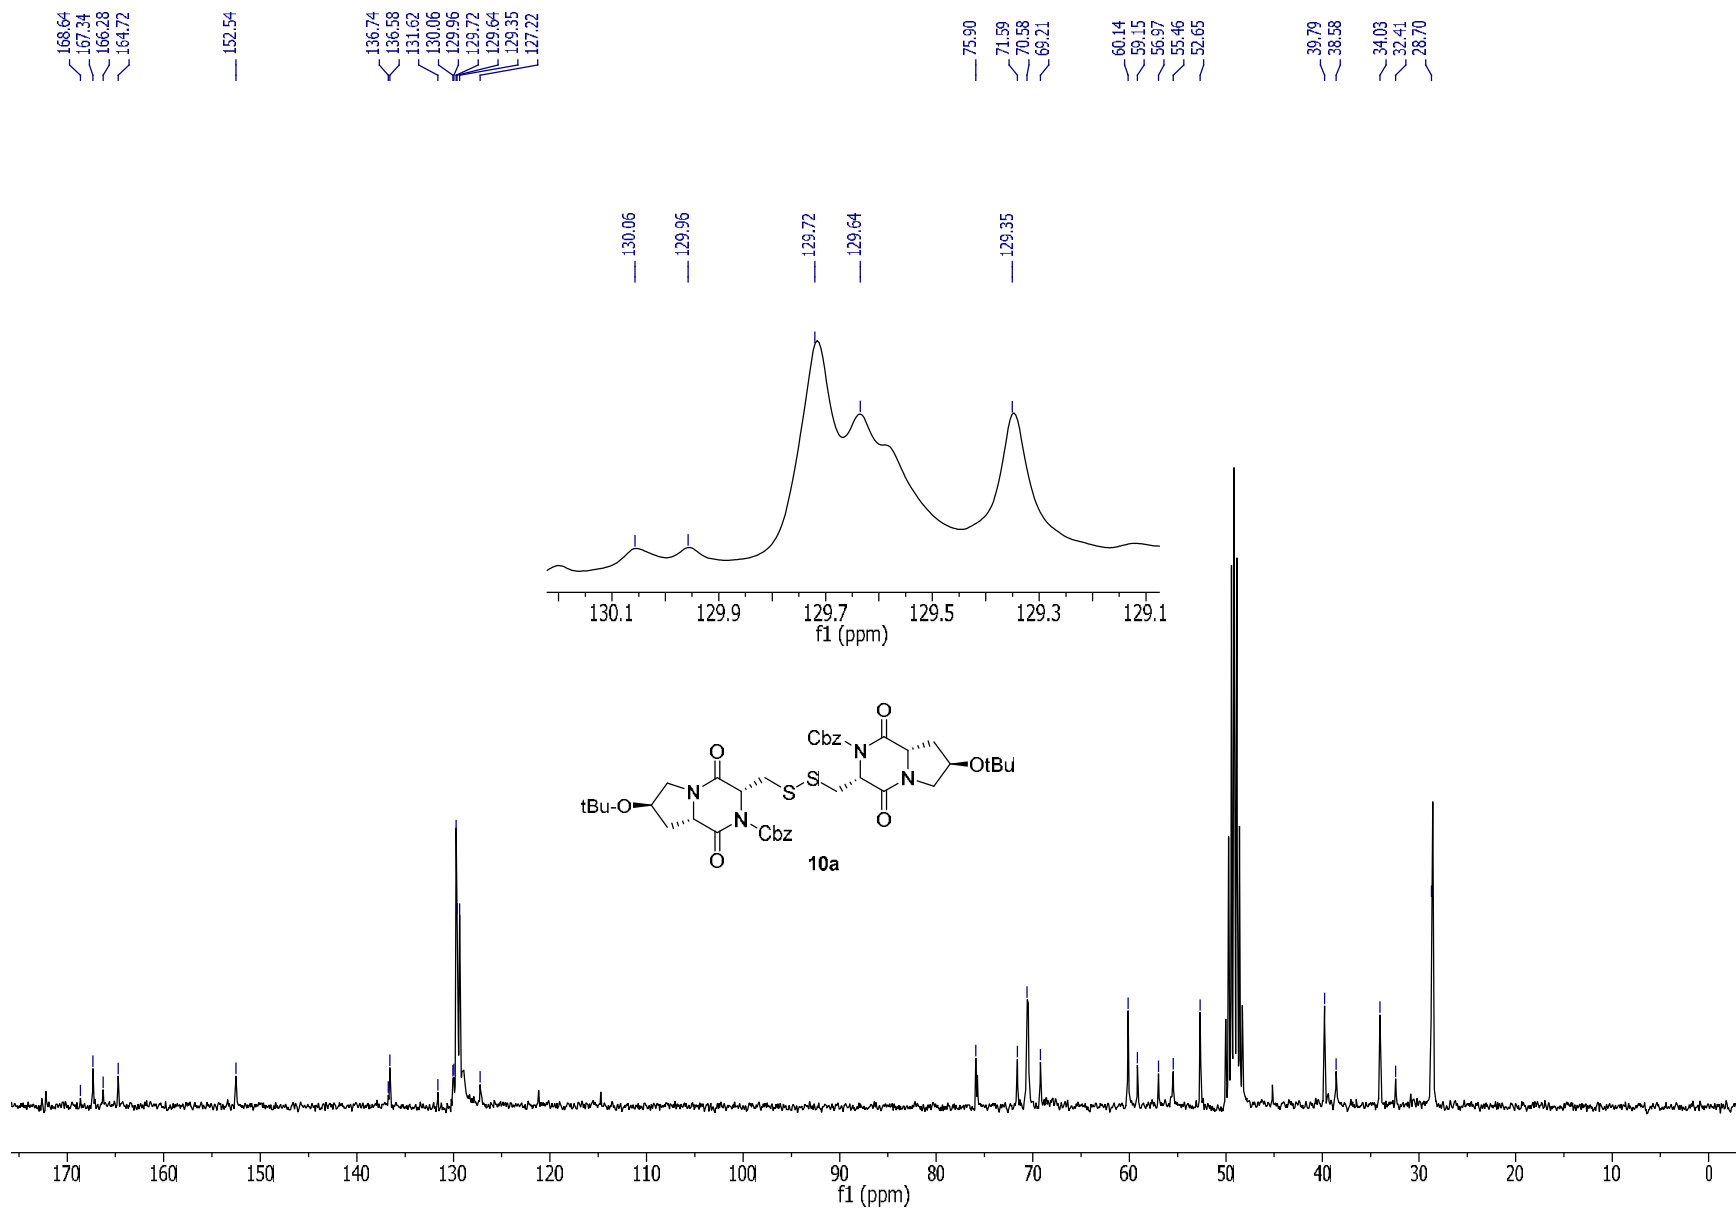

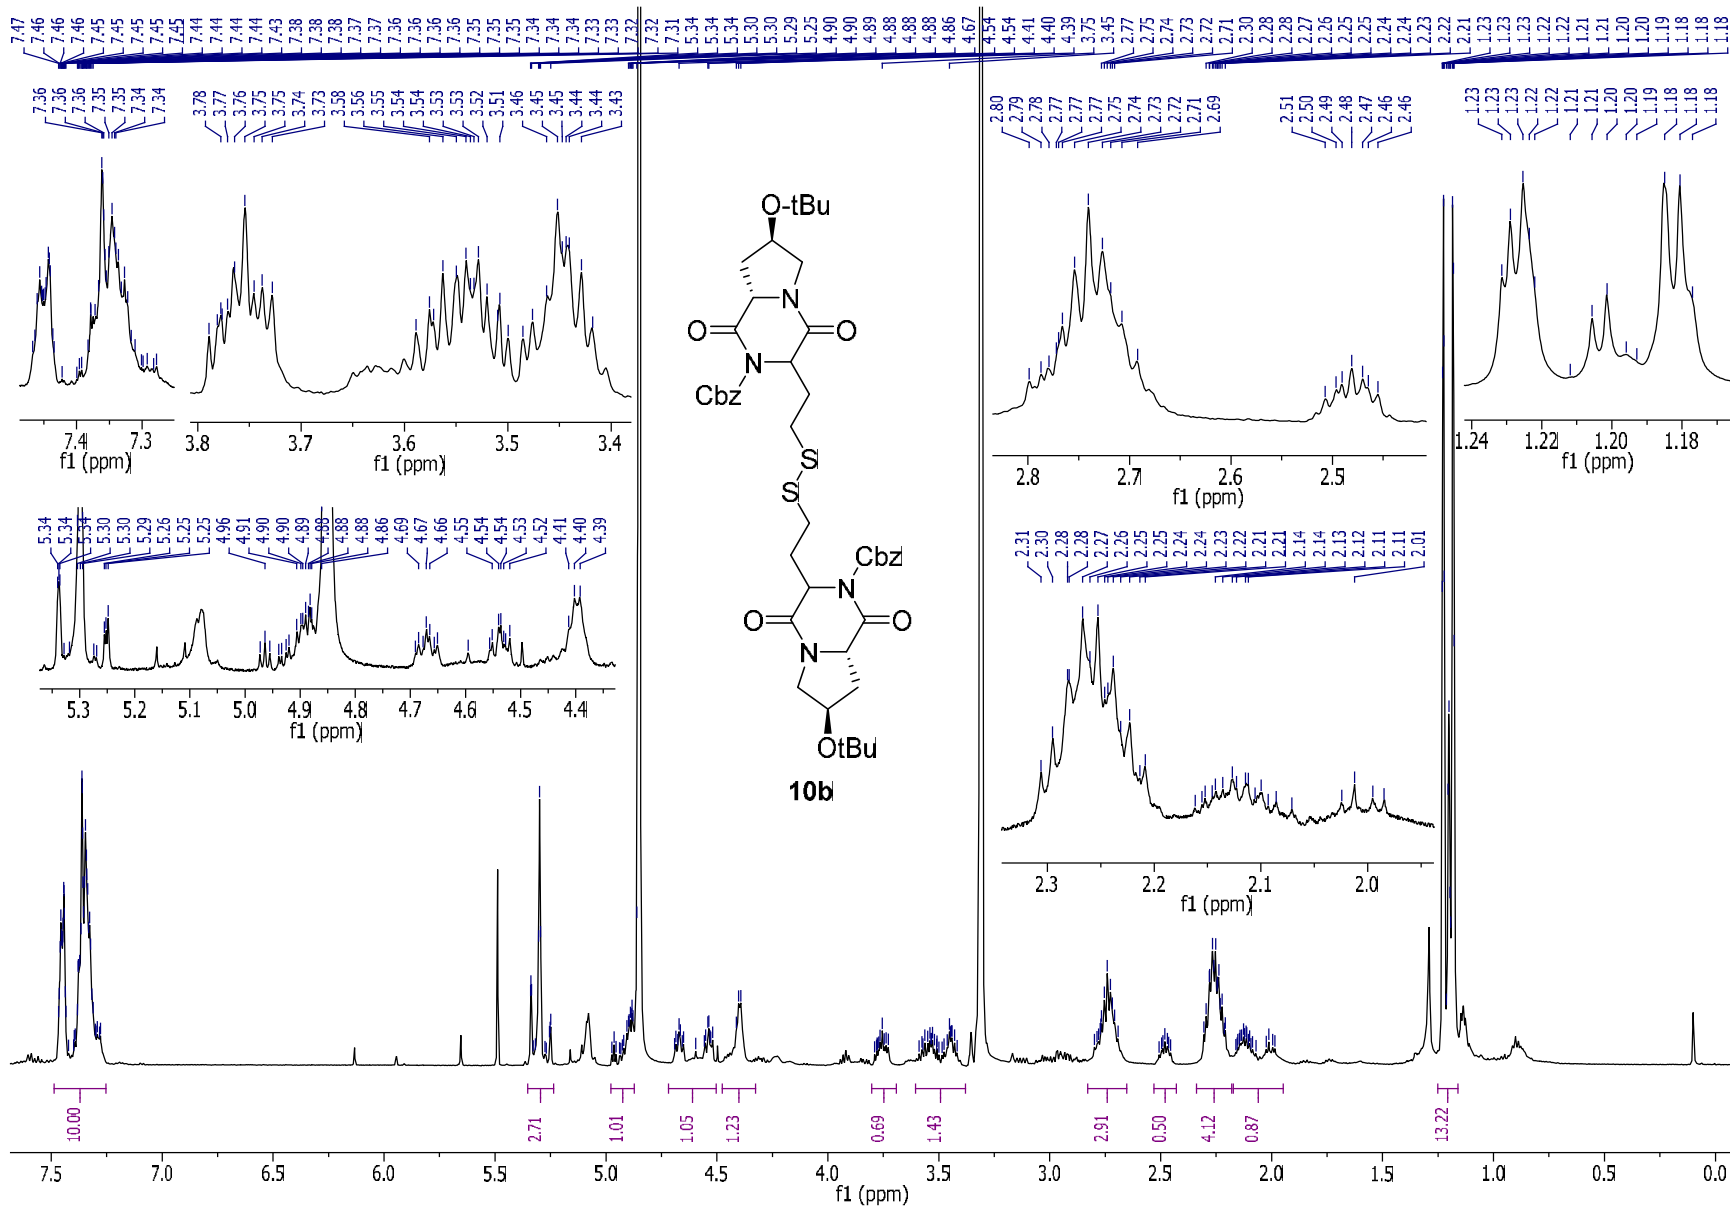

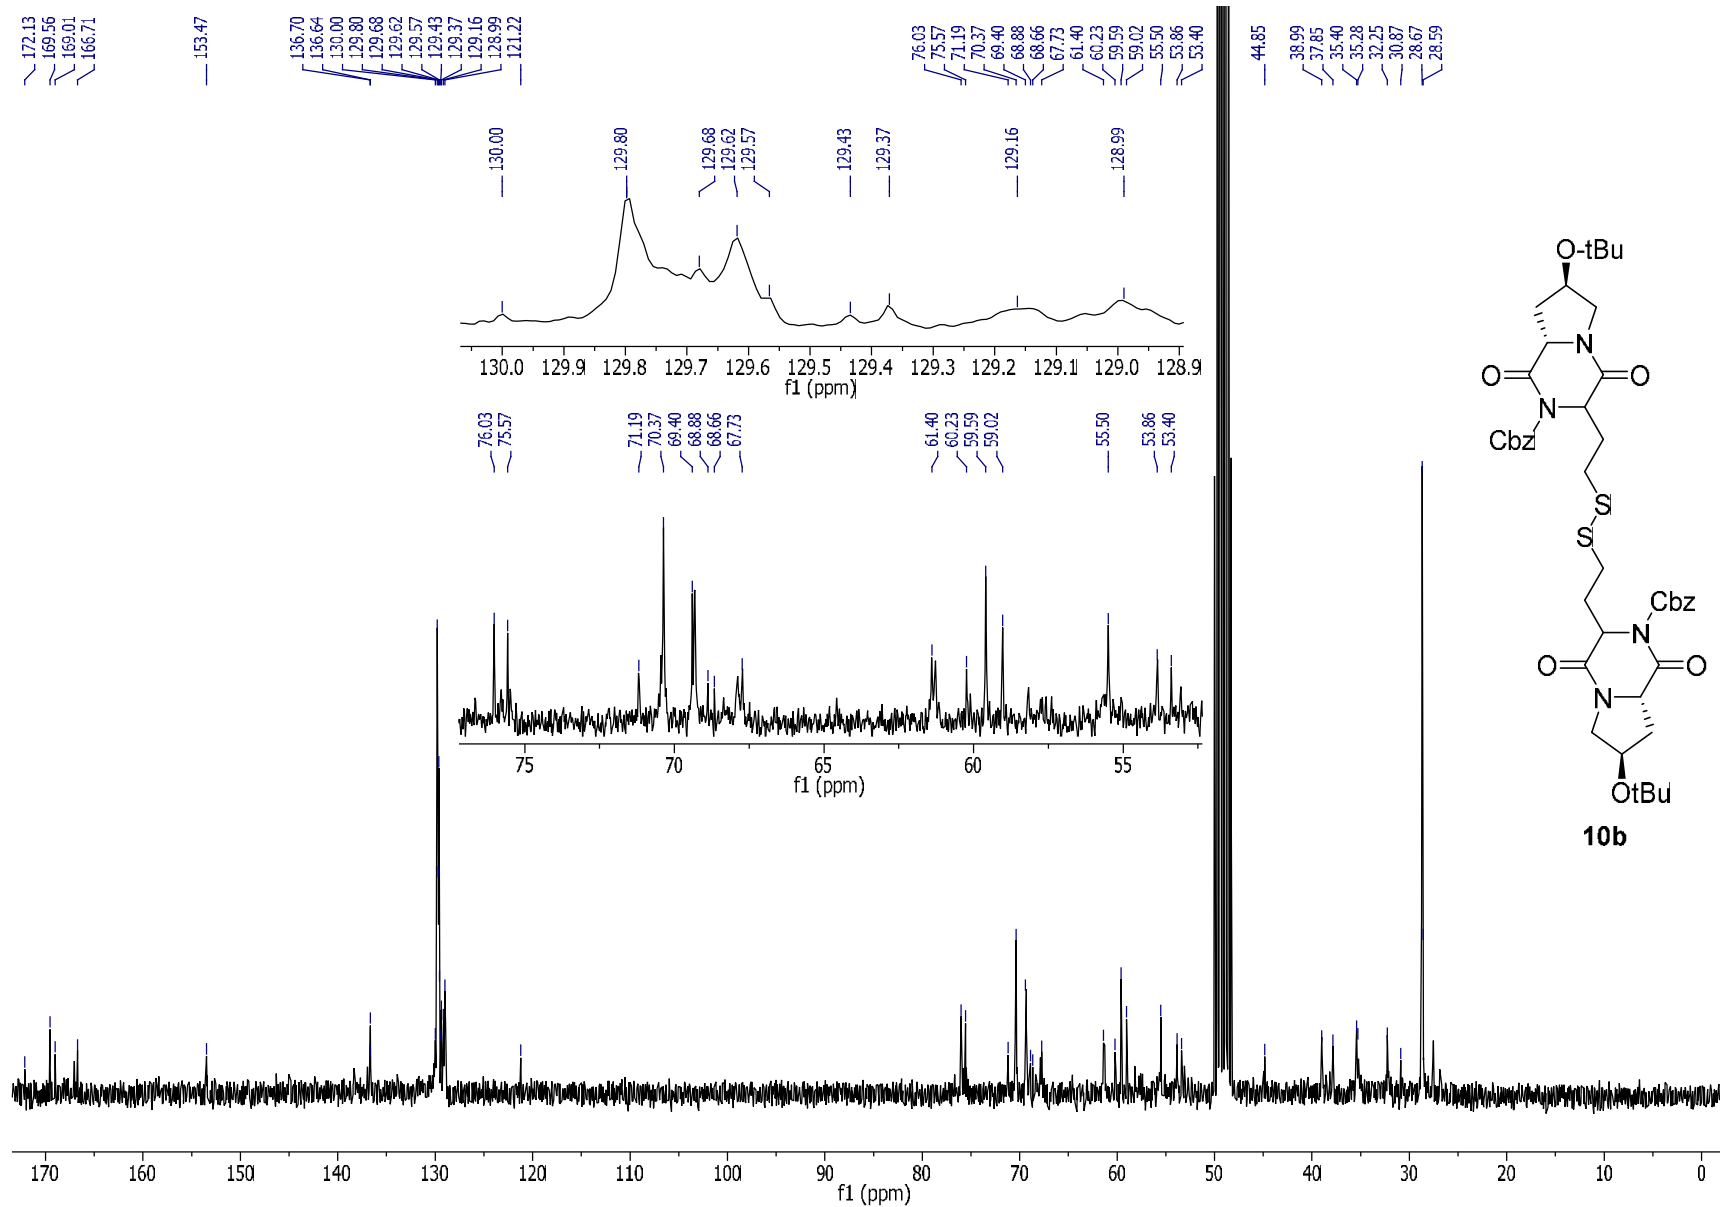

Supplement: c5ob00023h1.pdf [file c5ob00023h1.pdf]
